# Supplementary material for: ‘Hybrid’ mero-anionic polymethines with a 1,3,2-dioxaborine core
Source: Royal Society of Chemistry journal article supplement (doi:10.1039/d1nj05104k), 2021-12-03
Supplement: d1nj05104k1.pdf [file d1nj05104k1.pdf]

Supporting information

# 'Hybrid' mero-anionic polymethines with a 1,3,2-dioxaborine core

Vladyslav Polishchuk, Andrii Kulinich, Sergey Suykov, Eduard Rusanov,  
and Mykola Shandura\*

Institute of Organic Chemistry, National Academy of Sciences of Ukraine,  
5 Murmanska St., 02094 Kyiv, Ukraine

\* Corresponding author: [shandura@ukr.net](mailto:shandura@ukr.net)

## Table of content

|                                                                                                                                                                                                                                  |    |
|----------------------------------------------------------------------------------------------------------------------------------------------------------------------------------------------------------------------------------|----|
| Photostability Check .....                                                                                                                                                                                                       | 2  |
| X-Ray Crystal Data.....                                                                                                                                                                                                          | 4  |
| Additional Computation Details .....                                                                                                                                                                                             | 5  |
| The Cartesian atomic coordinates (in Å) from the DFT-B3LYP/6-31G(d,p)/IEFPCM <sub>CH<sub>2</sub>Cl<sub>2</sub></sub> optimization<br>of the ground-state geometries of molecules 5a, 6a, 14a, 5b, 6b, 14b, 5-s, 5a-s, 5b-s ..... | 9  |
| Dye 5a .....                                                                                                                                                                                                                     | 9  |
| Dye 6a .....                                                                                                                                                                                                                     | 9  |
| Dye 14a .....                                                                                                                                                                                                                    | 10 |
| Dye 5b .....                                                                                                                                                                                                                     | 11 |
| Dye 6b .....                                                                                                                                                                                                                     | 12 |
| Dye 14b .....                                                                                                                                                                                                                    | 12 |
| Dye 5-s .....                                                                                                                                                                                                                    | 13 |
| Dye 5a-s .....                                                                                                                                                                                                                   | 14 |
| Dye 5b-s .....                                                                                                                                                                                                                   | 15 |
| NMR Spectra of the Synthesized Compounds .....                                                                                                                                                                                   | 16 |
| Intermediate Dyes .....                                                                                                                                                                                                          | 16 |
| Mero-Anionic Dyes 5a-d .....                                                                                                                                                                                                     | 20 |
| Mero-Anionic Dyes 6a-d .....                                                                                                                                                                                                     | 27 |
| Mero-Anionic Dyes 14a-c.....                                                                                                                                                                                                     | 34 |
| References.....                                                                                                                                                                                                                  | 39 |

## Photostability Check

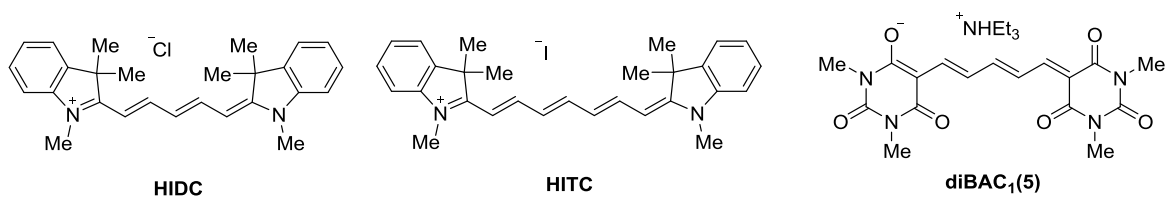

**Figure S1.** Structure formulae of indodicarbocyanine (**HIDC**), indotricarbocyanine (**HITC**) and bis(1,3-dimethyl barbituric acid) pentamethine oxonol (**diBAC<sub>1</sub>(5)**).

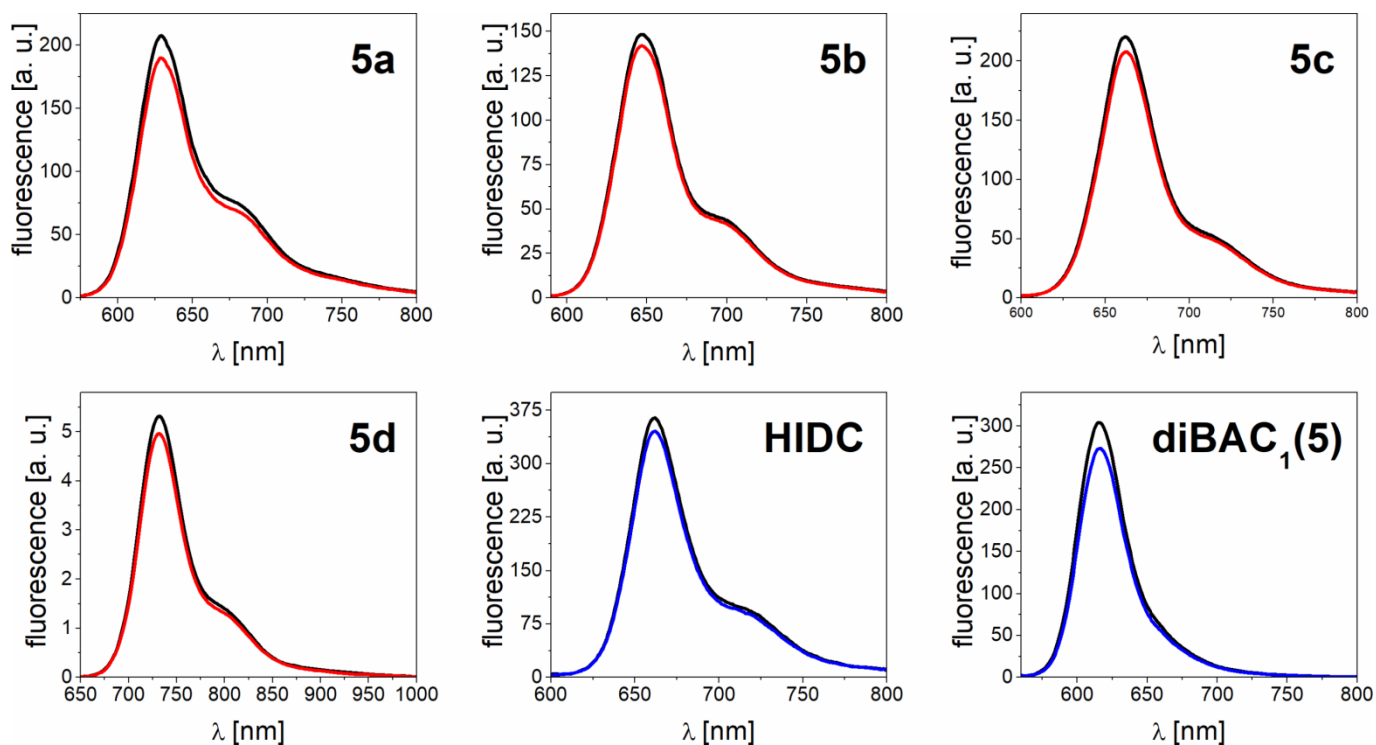

**Figure S2.** Fluorescence spectra of the dyes **5a-d**, **HIDC**, and **diBAC<sub>1</sub>(5)** in acetonitrile before (black lines) and after (colored lines) irradiation.

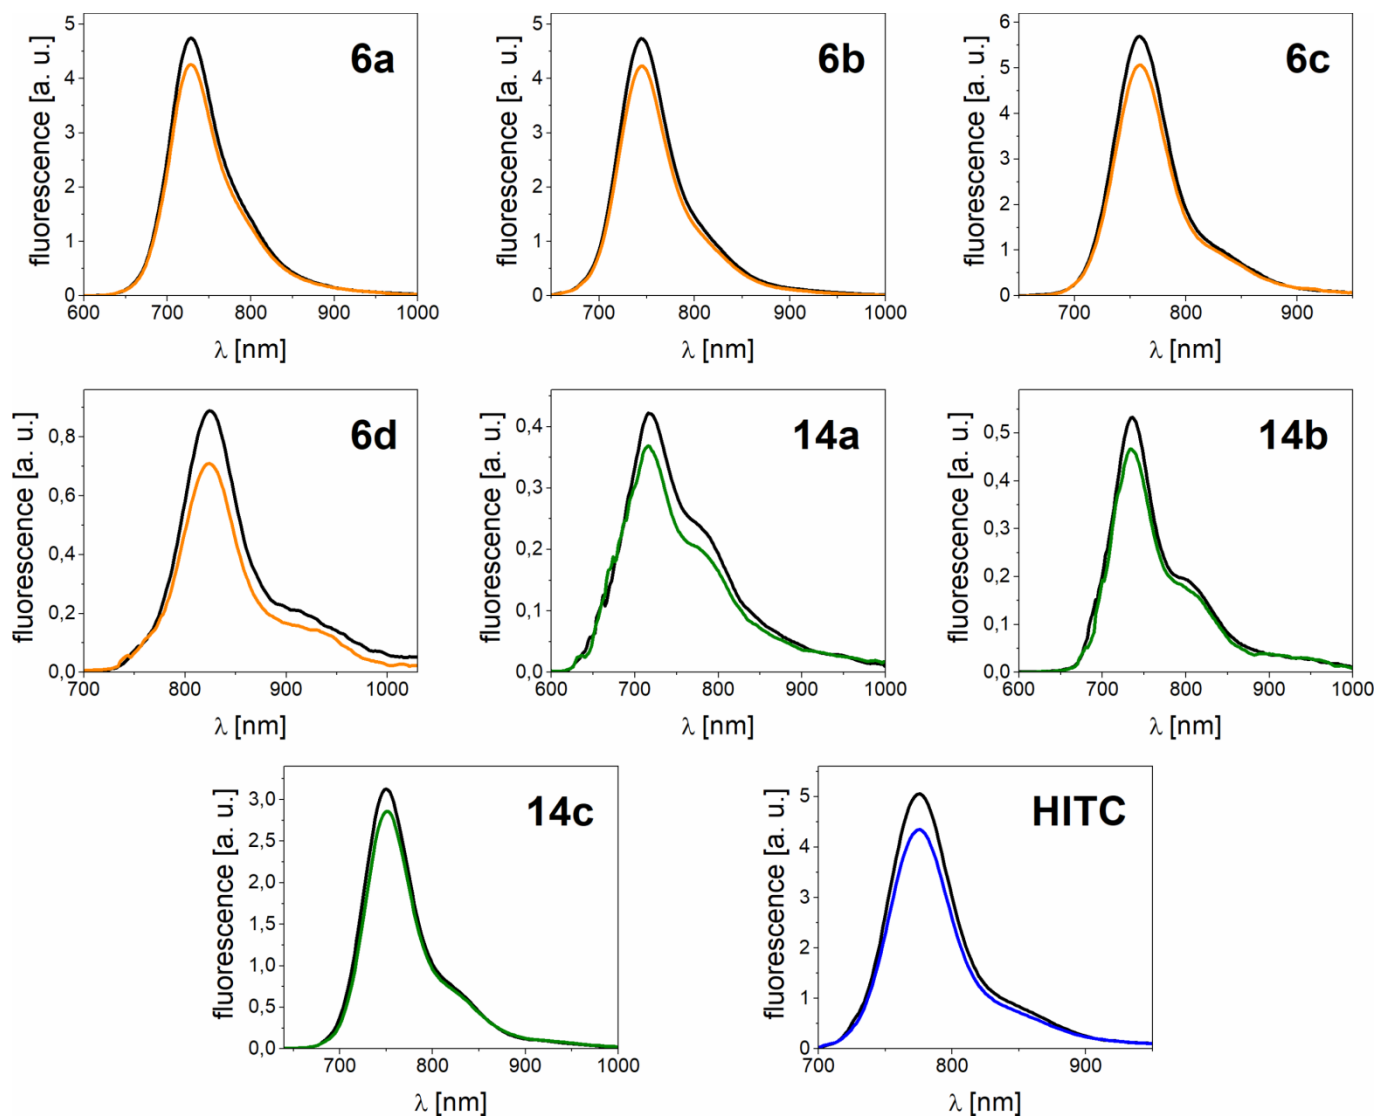

**Figure S3.** Fluorescence spectra of the longer-chained dyes **6a-d**, **14a-c** and **HITC** in acetonitrile before (black lines) and after (colored lines) irradiation.

## X-Ray Crystal Data

All crystallographic measurements were performed at 173 K on a Bruker Smart Apex II diffractometer operating in the  $\omega$  scans mode. The intensity data were collected within the  $\theta_{\max} \leq 25.4^\circ$  using Mo-K $\alpha$  radiation ( $\lambda = 0.71073 \text{ \AA}$ ). The intensities of 27044 reflections were collected (7767 unique reflections,  $R_{\text{merge}} = 0.0596$ ). The structure was solved by direct method and refined by the full-matrix least-squares technique in the anisotropic approximation for non-hydrogen atoms using the Bruker SHELXTL program package.<sup>1</sup> All CH hydrogen atoms were placed at calculated positions and refined using the 'riding' model. Convergence was obtained at  $R_1 = 0.0622$  and  $wR_2 = 0.1608$  for 5347 observed reflections with  $I \geq 2\sigma(I)$ ,  $R_1 = 0.0923$  and  $wR_2 = 0.1873$ , GOF = 0.994 for 7667 independent reflections, 526 parameters, the largest and minimal peaks in the final difference map 0.48 and  $-0.43 \text{ e/\AA}^3$ .

Crystal data for **5b'**: triclinic, space group P-1,  $a = 12.5711(7)$ ,  $b = 13.4042(8)$ ,  $c = 14.1491(8) \text{ \AA}$ ,  $\alpha = 92.556(4)$ ,  $\beta = 105.136(4)$ ,  $\gamma = 111.373(4)^\circ$ ,  $V = 2117.2(2) \text{ \AA}^3$ ,  $Z = 2$ ,  $d_c = 1.226 \text{ g}\cdot\text{cm}^{-3}$ ,  $\mu = 0.087 \text{ mm}^{-1}$ ,  $F(000) = 840$ , crystal size ca.  $0.2 \times 0.50 \times 0.50 \text{ mm}$ .

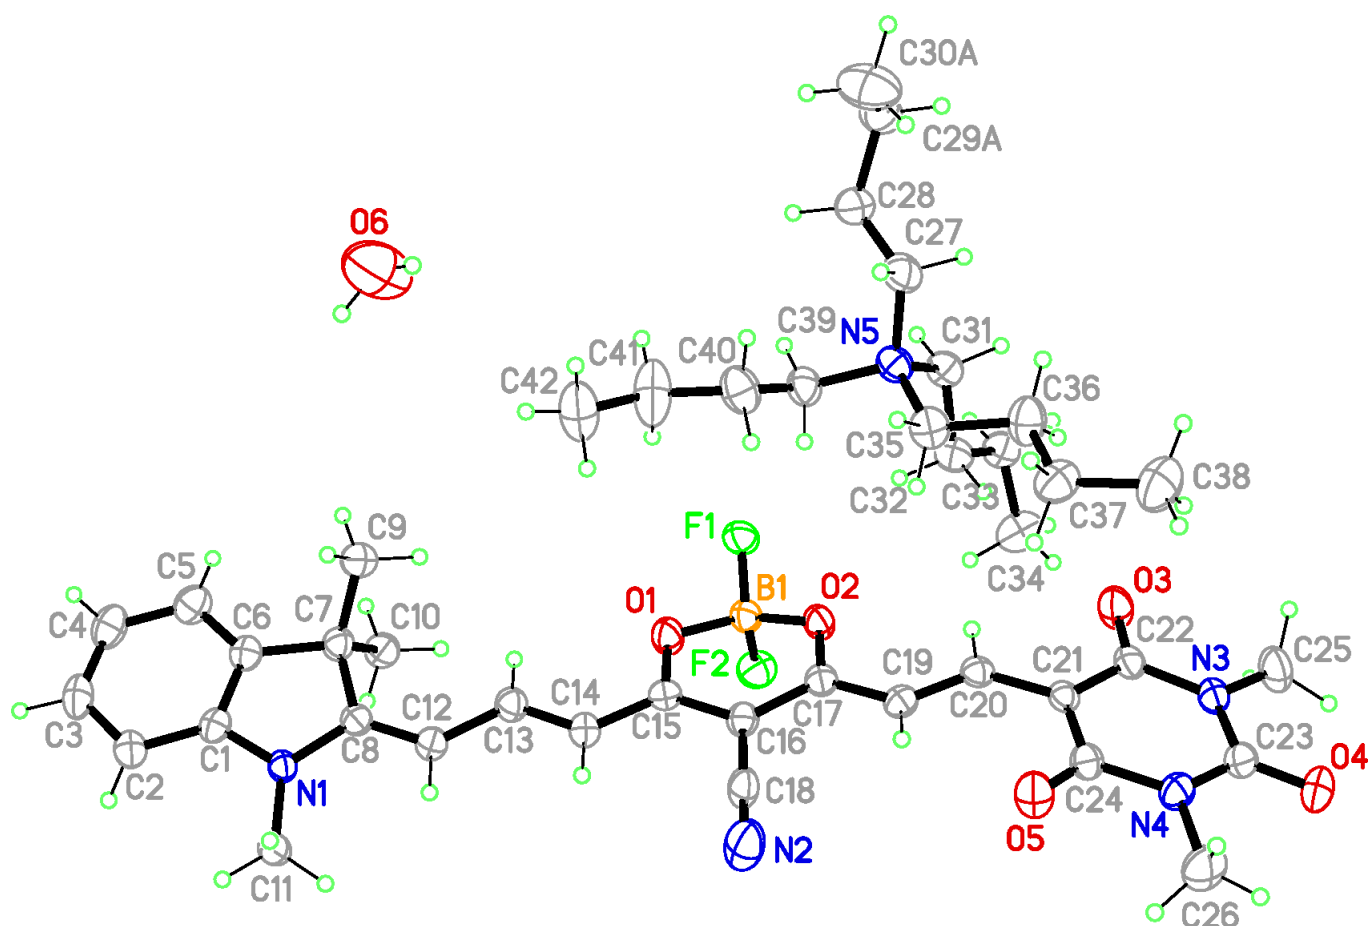

**Figure S4.** Molecular structure of dye **5b'** (ellipsoid contour probability level set at 50 %).

## Additional Computation Details

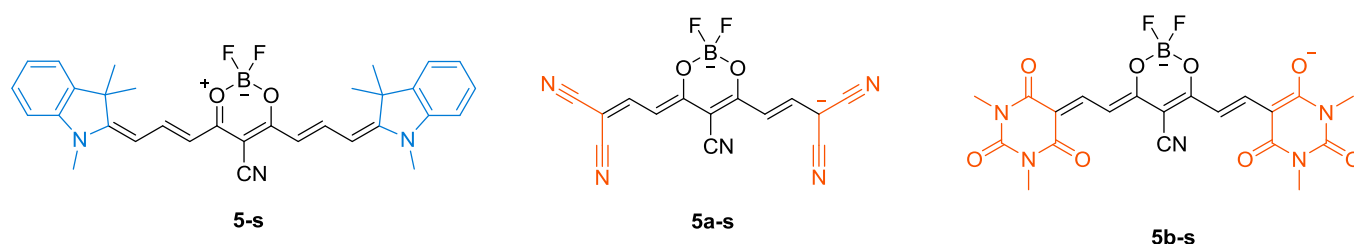

**Figure S5.** Structures of symmetrical dioxaborine dyes, parent to mero-anionic polymethines **5a** and **5b** (dianionic chromophores **5a-s** and **5b-s** are presented without counterions, since the latter were omitted in the (TD-)DFT calculations).

The computed total energies of the DFT-B3LYP/6-31G(d,p)/IEFPCM<sub>CH<sub>2</sub>Cl<sub>2</sub></sub> optimized structures of molecules **5a**, **6a**, **14a**, **5b**, **6b**, **14b**, **5-s**, **5a-s**, **5b-s** in the ground state  $S_0$  are listed below (in Hartree). In all cases, there were no negative (imaginary) frequencies, indicating that the found geometries were true minima. It should be repeated here that the indole 1-alkyl groups in molecules **6a**, **6b** were truncated into 1-methyl for uniformity.

|             |              |
|-------------|--------------|
| <b>5a</b>   | -1481.606418 |
| <b>6a</b>   | -1825.317729 |
| <b>14a</b>  | -1559.016431 |
| <b>5b</b>   | -1902.727740 |
| <b>6b</b>   | -1559.016513 |
| <b>14b</b>  | -1902.728189 |
| <b>5-s</b>  | -1778.169158 |
| <b>5a-s</b> | -1185.037599 |
| <b>5b-s</b> | -1872.459775 |

**Table S1.** The (TD-)DFT-B3LYP/6-31G(d,p)/IEFPCM<sub>CH<sub>2</sub>Cl<sub>2</sub></sub> calculated NBO<sup>2</sup> charges of the constituent parts of molecules **5a**, **6a**, **14a**, **5b**, **6b**, **14b**, **5-s**, **5a-s**, **5b-s** in the ground state  $S_0$  and their dipole moments (in Debye) in the ground state  $S_0$  and first excited Frank-Condon state  $S_1^{FC}$

| Dye         | Charge at the fragment* in the ground state $S_0$ |         |        |         |        |        | Dipole moment (D) |            |
|-------------|---------------------------------------------------|---------|--------|---------|--------|--------|-------------------|------------|
|             | D                                                 | $\pi 1$ | A      | $\pi 2$ | A'     | Total  | $S_0$             | $S_1^{FC}$ |
| <b>5a</b>   | 0.368                                             | -0.117  | -0.673 | 0.018   | -0.596 | -1.000 | 35.42             | 39.34      |
| <b>5b</b>   | 0.365                                             | -0.117  | -0.663 | 0.043   | -0.628 | -1.000 | 27.34             | 27.49      |
| <b>6a</b>   | 0.345                                             | -0.104  | -0.669 | 0.020   | -0.592 | -1.000 | 43.50             | 49.96      |
| <b>6b</b>   | 0.342                                             | -0.105  | -0.658 | 0.044   | -0.623 | -1.000 | 34.68             | 37.37      |
| <b>14a</b>  | 0.369                                             | -0.117  | -0.680 | 0.024   | -0.596 | -1.000 | 36.92             | 38.24      |
| <b>14b</b>  | 0.368                                             | -0.116  | -0.676 | 0.052   | -0.628 | -1.000 | 28.77             | 25.89      |
| <b>5-s</b>  | 0.417                                             | -0.104  | -0.626 | —       | —      | 0.000  | 3.74              | 4.30       |
| <b>5a-s</b> | —                                                 | —       | -0.722 | 0.001   | -0.640 | -2.000 | 3.55              | 2.39       |
| <b>5b-s</b> | —                                                 | —       | -0.698 | 0.027   | -0.678 | -2.000 | 2.46              | 4.18       |

\* D — the donor end-group (see the main text), A — the central dioxaborine ring (with the CN-group), A' — the acceptor end-group,  $\pi 1$  — the tri- or pentamethine chain between the D and A,  $\pi 2$  — the di- or tetramethine chain between the A and A'. Note that for symmetric dyes there are two D or two A groups together with the corresponding linker.

**Table S2.** The (TD-)DFT-B3LYP/6-31G(d,p)/IEFPCM<sub>CH<sub>2</sub>Cl<sub>2</sub></sub> calculated length (Å) of the chromophore CC-bonds in molecules **5a**, **6a**, **14a**, **5b**, **6b**, **14b**, **5-s**, **5a-s**, **5b-s** and the bond length alternations (Å) in the mero (BLA1) and anionic (BLA2) parts of the chromophore, estimated as a mean absolute deviation from the average bond length.

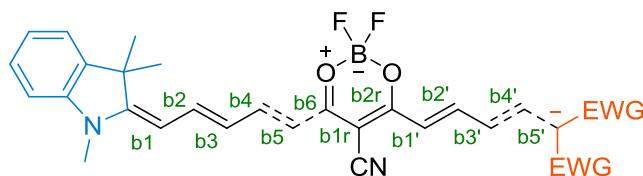

| bond/<br>BLA | <b>5a</b>    | <b>5b</b>    | <b>6a</b>    | <b>6b</b>    | <b>14a</b>   | <b>14b</b>   | <b>5-s</b>   | <b>5a-s</b>  | <b>5b-s</b>  |
|--------------|--------------|--------------|--------------|--------------|--------------|--------------|--------------|--------------|--------------|
| b1           | 1.3786       | 1.3784       | 1.3772       | 1.377        | 1.3788       | 1.3787       | 1.3833       |              |              |
| b2           | 1.417        | 1.4173       | 1.4191       | 1.4195       | 1.4168       | 1.4169       | 1.4109       |              |              |
| b3           | 1.3729       | 1.3726       | 1.3757       | 1.3754       | 1.3731       | 1.3731       | 1.378        |              |              |
| b4           | 1.4287       | 1.4291       | 1.4178       | 1.4182       | 1.4284       | 1.4284       | 1.4212       |              |              |
| b5           |              |              | 1.3718       | 1.3715       |              |              |              |              |              |
| b6           |              |              | 1.4301       | 1.4306       |              |              |              |              |              |
| b1r          | 1.4162       | 1.4164       | 1.4154       | 1.4155       | 1.4165       | 1.4166       | 1.4253       |              |              |
| b2r          | 1.437        | 1.437        | 1.4377       | 1.4378       | 1.4366       | 1.4364       |              | 1.4281       | 1.4283       |
| b1'          | 1.4064       | 1.4107       | 1.4059       | 1.4101       | 1.4072       | 1.408        |              | 1.4138       | 1.4191       |
| b2'          | 1.3892       | 1.3874       | 1.3896       | 1.3879       | 1.3904       | 1.3896       |              | 1.3839       | 1.3814       |
| b3'          | 1.402        | 1.4057       | 1.4016       | 1.4051       | 1.3975       | 1.4009       |              | 1.4082       | 1.4127       |
| b4'          |              |              |              |              | 1.3924       | 1.3915       |              |              |              |
| b5'          |              |              |              |              | 1.404        | 1.4061       |              |              |              |
| <b>BLA1</b>  | <b>0.024</b> | <b>0.024</b> | <b>0.024</b> | <b>0.024</b> | <b>0.022</b> | <b>0.023</b> | <b>0.018</b> | —            | —            |
| <b>BLA2</b>  | <b>0.007</b> | <b>0.010</b> | <b>0.006</b> | <b>0.009</b> | <b>0.006</b> | <b>0.007</b> | —            | <b>0.012</b> | <b>0.015</b> |

\* Note that for symmetric dyes b1r = b2r and the two parts of the chromophore are identical.

**Table S3.** The (TD-)DFT-B3LYP/6-31G(d,p)/IEFPCM<sub>CH<sub>2</sub>Cl<sub>2</sub></sub> calculated energies (eV) of selected MOs of mero-anionic polymethines **5a**, **5b** and the corresponding symmetric dyes **5-s**, **5a-s**, **5b-s**.

| Dye         | HOMO-1 | HOMO  | LUMO  | LUMO+1 |
|-------------|--------|-------|-------|--------|
| <b>5a</b>   | -5.35  | -4.76 | -2.04 | -0.86  |
| <b>5b</b>   | -5.32  | -4.74 | -2.04 | -0.90  |
| <b>5-s</b>  | -5.54  | -5.04 | -2.53 | -1.52  |
| <b>5a-s</b> | -5.11  | -4.40 | -1.41 | -0.22  |
| <b>5b-s</b> | -5.07  | -4.39 | -1.45 | -0.33  |

**Table S4.** The data from the TD-DFT computations of the three lowest singlet–singlet transitions\* in molecules **5a**, **6a**, **14a**, **5b**, **6b**, **14b**

| Dye            | Transition to   | Major components                                                | $E$ , eV | $E$ , nm | $f$   |
|----------------|-----------------|-----------------------------------------------------------------|----------|----------|-------|
| Dye <b>5a</b>  | Excited State 1 | HOMO→LUMO (100%)                                                | 2.541    | 488      | 1.985 |
|                | Excited State 2 | HOMO-1→LUMO (95.9%)<br>HOMO→LUMO+1 (3.2%)                       | 3.019    | 411      | 0.015 |
|                | Excited State 3 | HOMO-2→LUMO (3%)<br>HOMO-1→LUMO (3.3%)<br>HOMO→LUMO+1 (93%)     | 3.565    | 348      | 0.051 |
| Dye <b>5b</b>  | Excited State 1 | HOMO→LUMO (98.8%)                                               | 2.488    | 498      | 2.113 |
|                | Excited State 2 | HOMO-1→LUMO (97.2%)<br>HOMO→LUMO+1 (2.2%)                       | 2.975    | 417      | 0.018 |
|                | Excited State 3 | HOMO-1→LUMO (2.3%)<br>HOMO→LUMO+1 (94.4%)                       | 3.476    | 357      | 0.043 |
| Dye <b>6a</b>  | Excited State 1 | HOMO→LUMO (100%)                                                | 2.237    | 554      | 2.424 |
|                | Excited State 2 | HOMO-1→LUMO (97.2%)<br>HOMO→LUMO+1 (2.4%)                       | 2.760    | 449      | 0.006 |
|                | Excited State 3 | HOMO-2→LUMO (2.3%)<br>HOMO-1→LUMO (2.5%)<br>HOMO→LUMO+1 (94.3%) | 3.330    | 372      | 0.039 |
| Dye <b>6b</b>  | Excited State 1 | HOMO→LUMO (99.1%)                                               | 2.208    | 562      | 2.559 |
|                | Excited State 2 | HOMO-1→LUMO (97.9%)                                             | 2.719    | 456      | 0.005 |
|                | Excited State 3 | HOMO→LUMO+1 (94.8%)                                             | 3.252    | 381      | 0.035 |
| Dye <b>14a</b> | Excited State 1 | HOMO→LUMO (99.3%)                                               | 2.410    | 514      | 2.336 |
|                | Excited State 2 | HOMO-1→LUMO (90.4%)<br>HOMO→LUMO+1 (7.8%)                       | 2.765    | 448      | 0.043 |
|                | Excited State 3 | HOMO-1→LUMO (7.8%)<br>HOMO→LUMO+1 (90.2%)                       | 3.152    | 393      | 0.062 |
| Dye <b>14b</b> | Excited State 1 | HOMO→LUMO (99.6%)                                               | 2.345    | 529      | 2.491 |
|                | Excited State 2 | HOMO-1→LUMO (92.2%)<br>HOMO→LUMO+1 (6.3%)                       | 2.739    | 453      | 0.053 |
|                | Excited State 3 | HOMO-1→LUMO (6.5%)<br>HOMO→LUMO+1 (92.9%)                       | 3.087    | 402      | 0.058 |

\* Note that the TD-B3LYP/6-31G(d,p) vertical excitation energies of the long-wavelength  $S_1^{FC} \leftarrow S_0$  transitions were calculated within the nonequilibrium solvation state-specific PCM approach, while for the higher transitions the linear-response TD-DFT vertical transition energies are given. For comparison, the linear-response  $S_1^{FC} \leftarrow S_0$  transition energy for dye **5a** is equal to 2.300 eV (539 nm), a 0.241 eV difference from the value given in the table.



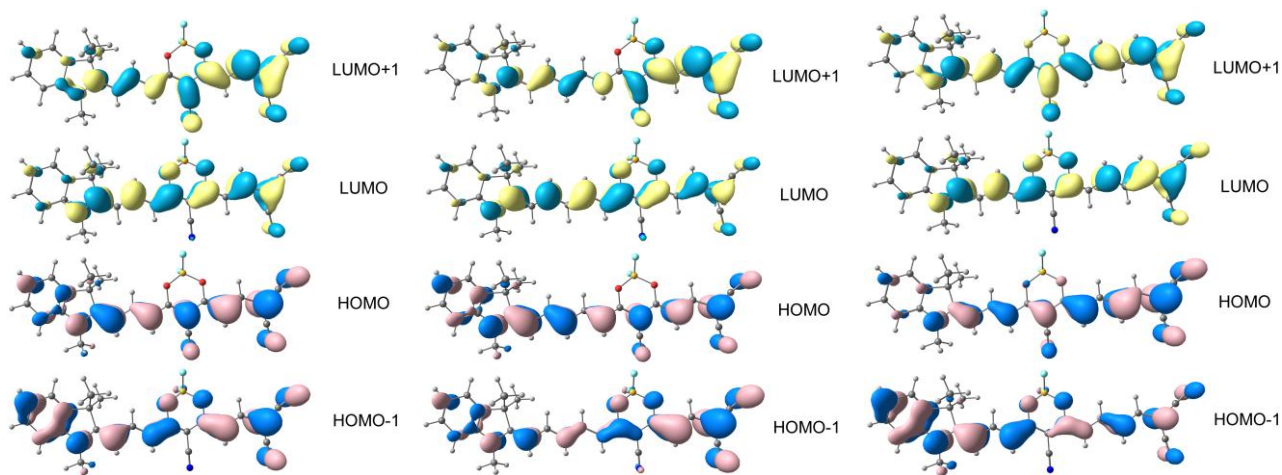

**Figure S6.** Selected MOs of dyes **5a**, **6a**, **14a**.

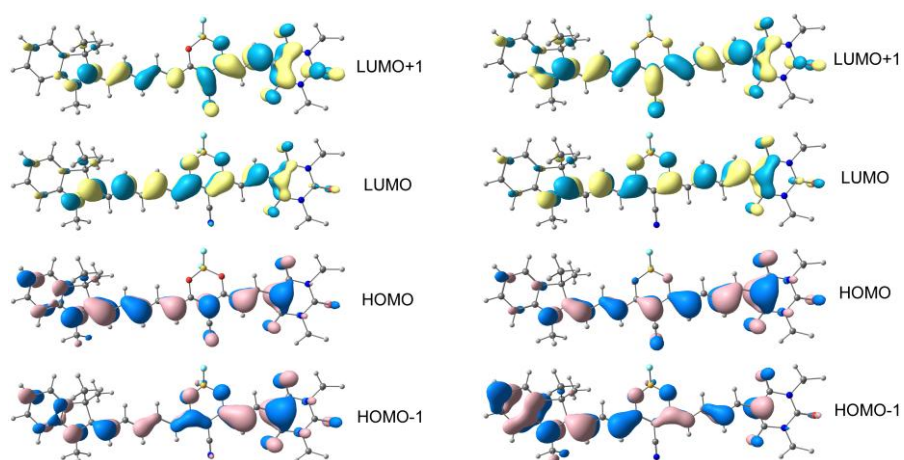

**Figure S7.** Selected MOs of dyes **6b**, **14b** (the MOs of dye **5b** are shown in the main paper).

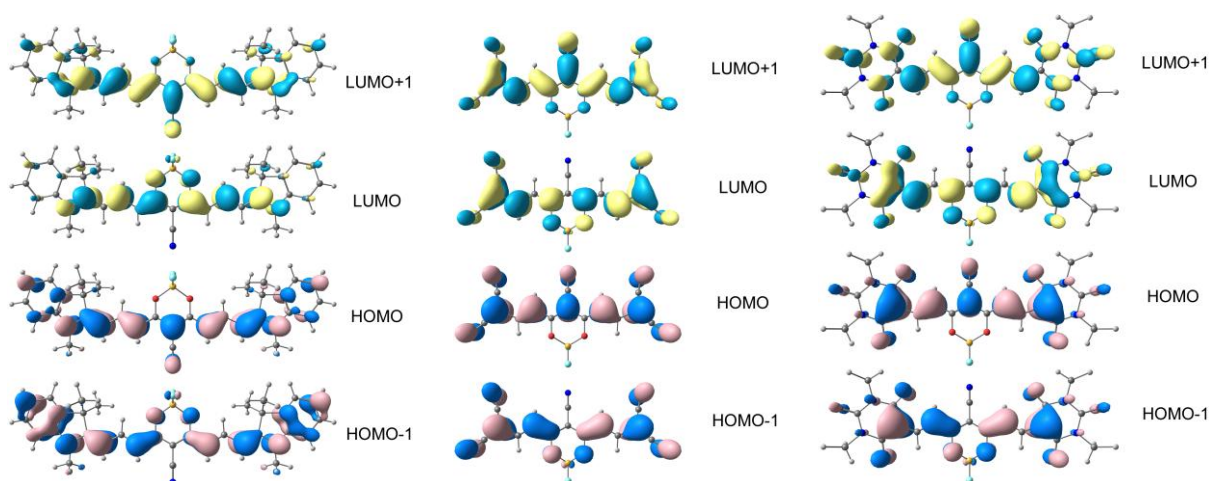

**Figure S8.** Selected MOs of dyes **5-s**, **5a-s**, **5b-s**.



**The Cartesian atomic coordinates (in Å) from the DFT-B3LYP/6-31G(d,p)/IEFPCM<sub>CH<sub>2</sub>Cl<sub>2</sub></sub> optimization of the ground-state geometries of molecules 5a, 6a, 14a, 5b, 6b, 14b, 5-s, 5a-s, 5b-s**

**Dye 5a**

|   |                  |                 |                 |
|---|------------------|-----------------|-----------------|
| N | -5.457518424539  | 2.096760876417  | -0.109588311349 |
| C | -6.661562668917  | 1.373047243718  | -0.177392139403 |
| C | -7.971711925986  | 1.845569855671  | -0.223863540829 |
| C | -9.000315338199  | 0.897652786834  | -0.287873948545 |
| C | -8.724850798289  | -0.471453687140 | -0.304645618190 |
| C | -7.398322923269  | -0.924867383188 | -0.257588562544 |
| C | -6.370124702075  | 0.003943551872  | -0.194332008566 |
| C | -4.862490057043  | -0.195007402781 | -0.134629122178 |
| C | -4.366564184369  | 1.263084973391  | -0.082912746053 |
| C | -3.076532129598  | 1.745483011789  | -0.022224233806 |
| C | -1.892168193490  | 0.968419438088  | 0.012605352916  |
| C | -0.625513617923  | 1.494539693622  | 0.071912803666  |
| C | 0.545726097981   | 0.676819204334  | 0.096664853055  |
| C | 1.853078647997   | 1.214764094834  | 0.181449981147  |
| C | 3.000807875995   | 0.356974731298  | 0.072516073139  |
| C | 4.317011460553   | 0.850258174842  | 0.025933929573  |
| C | 5.415970072834   | 0.004749651042  | -0.060155524498 |
| C | 6.764662536928   | 0.382418860389  | -0.123991333884 |
| C | 7.790049980246   | -0.595710402886 | -0.203868339817 |
| C | 7.166685160627   | 1.744886475568  | -0.113355055333 |
| C | -5.365754856145  | 3.547188666776  | -0.071916804246 |
| C | -4.475684676571  | -0.979538261731 | 1.141875024761  |
| C | -4.367357034766  | -0.924875484892 | -1.406084192131 |
| C | 2.031613055651   | 2.616027990237  | 0.301975386616  |
| N | 2.178021006683   | 3.769899860115  | 0.407231666734  |
| O | 0.383469268232   | -0.628547967895 | 0.013099141066  |
| O | 2.802684406104   | -0.946178774492 | -0.018560025587 |
| B | 1.496486780142   | -1.578564192919 | 0.294911216953  |
| F | 1.338574536884   | -2.680260477239 | -0.523115242090 |
| F | 1.462180097379   | -1.930962563913 | 1.639054624173  |
| N | 8.634536593462   | -1.401007239145 | -0.271069219610 |
| N | 7.484342537214   | 2.869204436394  | -0.104192920662 |
| H | -8.204637653134  | 2.904361893296  | -0.212058735723 |
| H | -10.029920535862 | 1.240434604894  | -0.324992950677 |
| H | -9.539057095551  | -1.187307939649 | -0.354504748333 |
| H | -7.183848548439  | -1.989807709015 | -0.270741110665 |
| H | -2.944028125572  | 2.823361340346  | 0.001190317720  |
| H | -1.965556187748  | -0.113226568980 | -0.007928763530 |
| H | -0.483044134185  | 2.569813575804  | 0.098764436817  |
| H | 4.456860614132   | 1.924895493836  | 0.056986744984  |
| H | 5.218804535475   | -1.063657208584 | -0.079986598011 |
| H | -4.808876241806  | 3.920994501204  | -0.936966655854 |
| H | -4.861247421859  | 3.876487731170  | 0.841799387644  |
| H | -6.365251138365  | 3.976299196504  | -0.090162101294 |
| H | -4.819262054415  | -0.459365848407 | 2.040144393050  |
| H | -3.395377858366  | -1.119992592996 | 1.219228017144  |
| H | -4.943963461616  | -1.968133233325 | 1.120195442511  |
| H | -4.832870937478  | -1.913159697147 | -1.466309362705 |
| H | -3.283973442450  | -1.062599229802 | -1.397786883371 |
| H | -4.635378484998  | -0.366537168979 | -2.307150013468 |

**Dye 6a**

|   |                  |                 |                 |
|---|------------------|-----------------|-----------------|
| N | -6.827230391059  | 1.480991369603  | -0.139815311107 |
| C | -7.998736002656  | 0.707676127694  | -0.201167397442 |
| C | -9.328439946606  | 1.124014869265  | -0.239206717657 |
| C | -10.316648031422 | 0.133775131171  | -0.298561407003 |
| C | -9.984368534926  | -1.222568273900 | -0.319009322327 |
| C | -8.639418253584  | -1.619510769549 | -0.280379795908 |
| C | -7.650755288005  | -0.648614496180 | -0.221657472846 |
| C | -6.135596467464  | -0.784841934208 | -0.170612745948 |
| C | -5.699722269312  | 0.692319414511  | -0.119945400217 |
| C | -4.431881643485  | 1.227358661530  | -0.065010759625 |
| C | -3.207754455744  | 0.509882982413  | -0.038655952155 |
| C | -1.964259968077  | 1.096180823315  | 0.011487628170  |
| C | -0.763707833158  | 0.342323188076  | 0.036997431597  |
| C | 0.500351377774   | 0.873059676361  | 0.085266583607  |
| C | 1.679607630515   | 0.064190278767  | 0.100332463620  |
| C | 2.981950115550   | 0.613998599274  | 0.170755393084  |
| C | 4.136603178050   | -0.234450632884 | 0.053059457088  |

|   |                  |                 |                 |
|---|------------------|-----------------|-----------------|
| C | 5.447369492834   | 0.270399297088  | -0.006729230575 |
| C | 6.553049793908   | -0.565959534061 | -0.102076905417 |
| C | 7.897206626884   | -0.176429317803 | -0.179650214397 |
| C | 8.930655185989   | -1.145538471230 | -0.267593917349 |
| C | 8.287325302531   | 1.189684702220  | -0.175614412357 |
| C | -6.795590248329  | 2.933173017411  | -0.101818670624 |
| C | -5.709550995864  | -1.554140689047 | 1.102549418589  |
| C | -5.617875905905  | -1.492871039003 | -1.445261242374 |
| C | 3.150266253404   | 2.017142841363  | 0.286533630417  |
| N | 3.289793550797   | 3.172115447546  | 0.387934713514  |
| O | 1.526692127555   | -1.242134676766 | 0.021587565894  |
| O | 3.948471876397   | -1.539168153256 | -0.033735432325 |
| B | 2.650460680687   | -2.182788692609 | 0.291987056502  |
| F | 2.494374358234   | -3.285352446610 | -0.525047276693 |
| F | 2.632365141859   | -2.535682241214 | 1.636160072247  |
| N | 9.781707671756   | -1.943208164672 | -0.341403907180 |
| N | 8.595401237094   | 2.316628879773  | -0.171849550127 |
| H | -9.605672256035  | 2.172093496522  | -0.224468388837 |
| H | -11.359946960429 | 0.433177670174  | -0.329064225056 |
| H | -10.768026011698 | -1.971970572730 | -0.365144938563 |
| H | -8.380413031155  | -2.674530773533 | -0.296437140297 |
| H | -4.346604803894  | 2.310173070797  | -0.039455820341 |
| H | -3.236010679304  | -0.576059485121 | -0.059444203910 |
| H | -1.891060128081  | 2.182922050568  | 0.031946342361  |
| H | -0.853335261168  | -0.742420873968 | 0.016251928367  |
| H | 0.636171681644   | 1.949243780454  | 0.110215800205  |
| H | 5.578164063842   | 1.346226259984  | 0.021214143713  |
| H | 6.364934849123   | -1.636056591636 | -0.118212001290 |
| H | -6.255065586990  | 3.330418165404  | -0.967044429216 |
| H | -6.304619649624  | 3.283933029183  | 0.811586245450  |
| H | -7.811972259058  | 3.320854128021  | -0.119718478958 |
| H | -6.071762450930  | -1.050972893426 | 2.003158681670  |
| H | -4.623635719044  | -1.646487717693 | 1.175602411898  |
| H | -6.133491559121  | -2.562652198926 | 1.081601455636  |
| H | -6.040604177002  | -2.500363745092 | -1.503539368761 |
| H | -4.529367194890  | -1.583561880445 | -1.444085870911 |
| H | -5.915001787326  | -0.946262717879 | -2.344372552833 |

## Dye 14a

|   |                  |                 |                 |
|---|------------------|-----------------|-----------------|
| N | -6.485091793237  | 2.012861702167  | -0.145684438730 |
| C | -7.661571882645  | 1.244753987730  | -0.209156631379 |
| C | -8.987559573530  | 1.668556827316  | -0.272830536340 |
| C | -9.980605925933  | 0.682954009100  | -0.328119142007 |
| C | -9.655575946077  | -0.675324929494 | -0.319800715899 |
| C | -8.313931382091  | -1.079429209488 | -0.255344634046 |
| C | -7.320580805688  | -0.112922504792 | -0.200166273992 |
| C | -5.807261828606  | -0.255768585457 | -0.125585615816 |
| C | -5.365046076137  | 1.220052200125  | -0.094225844951 |
| C | -4.093971701060  | 1.750125817176  | -0.028031585542 |
| C | -2.882541698067  | 1.017600197924  | 0.027990570760  |
| C | -1.636399710164  | 1.590414789321  | 0.094789595467  |
| C | -0.436745365195  | 0.816374193573  | 0.138699523415  |
| C | 0.849782915463   | 1.402009606690  | 0.230136593151  |
| C | 2.028541504519   | 0.585383911046  | 0.144091392956  |
| C | 3.327911764990   | 1.124197260788  | 0.106489109647  |
| C | 4.468905408001   | 0.332967853436  | 0.034172283913  |
| C | 5.783540188395   | 0.804273439211  | -0.017458296970 |
| C | 6.869665273409   | -0.064291023532 | -0.085880918176 |
| C | 8.229073629714   | 0.281970792179  | -0.143096459822 |
| C | 9.232500852211   | -0.718558170976 | -0.212926856291 |
| C | 8.660683347170   | 1.634834710784  | -0.135645727237 |
| C | -6.446430897191  | 3.466144509620  | -0.135199610178 |
| C | -5.402584798909  | -1.004520253980 | 1.166732231723  |
| C | -5.275748738312  | -0.987799067845 | -1.381027882229 |
| C | 0.976375014765   | 2.810192563417  | 0.335926340558  |
| N | 1.081308122103   | 3.969667086836  | 0.428807288410  |
| O | -0.550575277203  | -0.494857214036 | 0.066232718265  |
| O | 1.879979595704   | -0.725697343577 | 0.065945754439  |
| B | 0.593298841618   | -1.404421924681 | 0.358207852404  |
| F | 0.485603218427   | -2.507712498341 | -0.466753678751 |
| F | 0.553064431731   | -1.765156991098 | 1.700238769757  |
| N | 10.057247989849  | -1.545035723510 | -0.271182980018 |
| N | 9.002970485046   | 2.752121646965  | -0.128935296161 |
| H | -9.258650040135  | 2.718278438803  | -0.280231528910 |
| H | -11.021651194871 | 0.987361713432  | -0.378264364950 |
| H | -10.442907500489 | -1.421027273917 | -0.363324686303 |
| H | -8.061037468959  | -2.135966369937 | -0.248802585053 |
| H | -4.001257582157  | 2.832362073840  | -0.017725872588 |
| H | -2.915912260985  | -0.066180417032 | 0.018283547620  |
| H | -1.533701731106  | 2.670435550180  | 0.112427276909  |

|   |                 |                 |                 |
|---|-----------------|-----------------|-----------------|
| H | 3.424516574949  | 2.204425575547  | 0.131642250519  |
| H | 4.320465950802  | -0.745750197921 | 0.016745677411  |
| H | 5.961690249321  | 1.877723226248  | -0.004815399156 |
| H | 6.657072176618  | -1.131798029411 | -0.097740557158 |
| H | -5.884530491303 | 3.842344812890  | -0.995872518753 |
| H | -5.974340231459 | 3.832068370635  | 0.781968972714  |
| H | -7.460097434867 | 3.858011444020  | -0.184145396795 |
| H | -5.772717772804 | -0.482744133548 | 2.053455190569  |
| H | -4.318515006579 | -1.103437208676 | 1.254853324943  |
| H | -5.833768846186 | -2.010044854628 | 1.157986011319  |
| H | -5.704224773935 | -1.993399838266 | -1.427830979892 |
| H | -4.188159917275 | -1.085391867602 | -1.362739394793 |
| H | -5.557180915894 | -0.454722729747 | -2.293239541707 |

## Dye 5b

|   |                  |                 |                 |
|---|------------------|-----------------|-----------------|
| N | -6.578331078226  | 1.541519642322  | -0.063822597947 |
| C | -7.776735457320  | 0.808062316563  | -0.123055202926 |
| C | -9.090912176595  | 1.269919964325  | -0.163424380501 |
| C | -10.112262897104 | 0.313678696585  | -0.219391196663 |
| C | -9.825993404453  | -1.053220150450 | -0.234308541914 |
| C | -8.495602270927  | -1.495869447256 | -0.193419326510 |
| C | -7.474509259738  | -0.558776863091 | -0.138078949317 |
| C | -5.965014276211  | -0.745602435758 | -0.085836030716 |
| C | -5.480382162595  | 0.716480562887  | -0.040409676938 |
| C | -4.194226945019  | 1.209257566341  | 0.013215727175  |
| C | -3.002770933085  | 0.442393226877  | 0.044812388628  |
| C | -1.741217642074  | 0.980438185852  | 0.100461866507  |
| C | -0.561436322733  | 0.174314446640  | 0.125174873728  |
| C | 0.740600662984   | 0.725346562562  | 0.210385144409  |
| C | 1.898304760415   | -0.119592722101 | 0.106896453888  |
| C | 3.209391285644   | 0.399343135757  | 0.064896749445  |
| C | 4.315805539687   | -0.433695743697 | -0.016613544974 |
| C | 5.682569517962   | -0.109990274916 | -0.071593171083 |
| C | 6.609354094449   | -1.229582020908 | -0.152420505799 |
| N | 7.981883823984   | -0.903620276337 | -0.208040045687 |
| C | 8.485569440710   | 0.387799875447  | -0.180286279100 |
| N | 7.568902839060   | 1.424046373000  | -0.106866075410 |
| C | 6.163664452093   | 1.256147232110  | -0.049133030112 |
| C | -6.497894231340  | 2.992644300909  | -0.030400266042 |
| C | -5.565279762019  | -1.523657745833 | 1.190638713548  |
| C | -5.470628367541  | -1.474812346787 | -1.357928866676 |
| C | 0.900533119767   | 2.129714685792  | 0.327193467062  |
| N | 1.021615367343   | 3.286694635909  | 0.429464662552  |
| O | -0.711087574665  | -1.132180100676 | 0.042134243896  |
| O | 1.712238588851   | -1.423643790824 | 0.018762447579  |
| B | 0.412470643739   | -2.071797934548 | 0.320560448796  |
| F | 0.268265225257   | -3.169146419214 | -0.506247981338 |
| F | 0.374914381917   | -2.434959151649 | 1.661949583686  |
| O | 6.270651074080   | -2.417745714253 | -0.175788591048 |
| O | 9.695616724718   | 0.603753410227  | -0.221187273989 |
| O | 5.445310411240   | 2.260198508045  | 0.016519892613  |
| C | 8.970231929100   | -1.980854389802 | -0.292494928016 |
| C | 8.128203397124   | 2.777375181228  | -0.086003428001 |
| H | -9.332190119935  | 2.326860458381  | -0.152899824496 |
| H | -11.144766821902 | 0.648167897041  | -0.251611629873 |
| H | -10.634707423965 | -1.775685554562 | -0.277869049361 |
| H | -8.272665187695  | -2.559092719912 | -0.205082697355 |
| H | -4.070480284702  | 2.288240859328  | 0.034308301040  |
| H | -3.066475105398  | -0.639920902453 | 0.025452478291  |
| H | -1.609273264156  | 2.057016034861  | 0.126628572844  |
| H | 3.337235709365   | 1.471628393115  | 0.097033045060  |
| H | 4.118594276122   | -1.502348354819 | -0.041865827521 |
| H | -5.946318073580  | 3.368360232367  | -0.898022856359 |
| H | -5.993463744718  | 3.328665562106  | 0.880951328426  |
| H | -7.500789207360  | 3.413860702022  | -0.047215813583 |
| H | -5.908474650548  | -1.003928258100 | 2.089319030305  |
| H | -4.483469434831  | -1.654994104384 | 1.262764101474  |
| H | -6.025510348494  | -2.516137412904 | 1.173990024696  |
| H | -5.928229578101  | -2.467086195658 | -1.413090435407 |
| H | -4.386110669004  | -1.603530045263 | -1.354977729827 |
| H | -5.747984398610  | -0.921111759334 | -2.259038662642 |
| H | 9.612914152523   | -1.979060732933 | 0.591186588295  |
| H | 9.596611471506   | -1.847749251004 | -1.176803406124 |
| H | 8.421516133123   | -2.916676699856 | -0.354025683641 |
| H | 7.293890375273   | 3.470908226717  | -0.026103120557 |
| H | 8.708422173087   | 2.961121259812  | -0.993061624459 |
| H | 8.786015115602   | 2.902096157403  | 0.776948107225  |

## Dye 6b

|   |                  |                 |                 |
|---|------------------|-----------------|-----------------|
| N | -8.044842740101  | 1.472172133322  | -0.059135258591 |
| C | -9.212171079412  | 0.692437775587  | -0.114926385790 |
| C | -10.544393272055 | 1.101354367024  | -0.145899791116 |
| C | -11.527420182426 | 0.105699772987  | -0.200710530147 |
| C | -11.187792371898 | -1.248768289298 | -0.223667845791 |
| C | -9.840441319212  | -1.638235071492 | -0.192246128907 |
| C | -8.856841997811  | -0.661967252163 | -0.138057170498 |
| C | -7.340677158402  | -0.789891862112 | -0.094825523427 |
| C | -6.912605784621  | 0.689602761393  | -0.046020023604 |
| C | -5.647718010179  | 1.231585777021  | 0.002129406255  |
| C | -4.418721645607  | 0.521613522255  | 0.022456328143  |
| C | -3.179416072125  | 1.116507140586  | 0.067702576338  |
| C | -1.972419627251  | 0.372265558738  | 0.089655382857  |
| C | -0.713562700704  | 0.914658506284  | 0.136495643580  |
| C | 0.474329421523   | 0.117644271362  | 0.152119599740  |
| C | 1.770883710244   | 0.680772893941  | 0.225454337600  |
| C | 2.936001877273   | -0.154314071861 | 0.114614200847  |
| C | 4.241253731197   | 0.376669613109  | 0.062247089637  |
| C | 5.355000598584   | -0.446825005373 | -0.025016170591 |
| C | 6.717834795481   | -0.110975103940 | -0.089538776004 |
| C | 7.654583620813   | -1.222646851429 | -0.171552376884 |
| N | 9.023495365496   | -0.884314927190 | -0.235815702749 |
| C | 9.515400808729   | 0.411887418972  | -0.216449642156 |
| N | 8.589809897363   | 1.440189628787  | -0.141881548235 |
| C | 7.186766008448   | 1.259877354912  | -0.075254456392 |
| C | -8.021012248129  | 2.924383192801  | -0.019887856455 |
| C | -6.903862559360  | -1.556935835027 | 1.176042973125  |
| C | -6.825429865469  | -1.494914324655 | -1.372089284727 |
| C | 1.919941966152   | 2.086781514269  | 0.339350233248  |
| N | 2.033513283526   | 3.244617937763  | 0.439405453499  |
| O | 0.334424913358   | -1.189659931433 | 0.072267443442  |
| O | 2.760442461779   | -1.459844483630 | 0.029631678317  |
| B | 1.468399073078   | -2.119810657318 | 0.340289042373  |
| F | 1.327756587550   | -3.216987752056 | -0.487203220766 |
| F | 1.444538989514   | -2.485019652786 | 1.681276570890  |
| O | 7.326226280251   | -2.413686506704 | -0.188503149215 |
| O | 10.723067271376  | 0.638594826601  | -0.265288981593 |
| O | 6.459470353784   | 2.257261600772  | -0.009508042599 |
| C | 10.021649760049  | -1.952511127169 | -0.320915383852 |
| C | 9.137059607771   | 2.798629500765  | -0.129959637791 |
| H | -10.827323603348 | 2.147894342636  | -0.129270849042 |
| H | -12.572504978813 | 0.399367064094  | -0.225665925948 |
| H | -11.967514833728 | -2.002479937764 | -0.266201328680 |
| H | -9.575683834251  | -2.691795948589 | -0.210317802899 |
| H | -5.568548648639  | 2.314883759042  | 0.027499149778  |
| H | -4.439897504034  | -0.564505513734 | 0.001480889566  |
| H | -3.114201246936  | 2.203783064407  | 0.088429899366  |
| H | -2.052802762647  | -0.713207987902 | 0.068581253464  |
| H | -0.588372143221  | 1.992056707031  | 0.162374753194  |
| H | 4.359425498612   | 1.450145299669  | 0.091540415407  |
| H | 5.167173610891   | -1.517250949253 | -0.046424098589 |
| H | -7.489666589516  | 3.325783858604  | -0.888914625799 |
| H | -7.524686428583  | 3.276904872678  | 0.889953268444  |
| H | -9.039674589460  | 3.306383411014  | -0.029036013492 |
| H | -7.264655766482  | -1.056090931734 | 2.078521433128  |
| H | -5.817057216992  | -1.642693839616 | 1.243735543780  |
| H | -7.321820667982  | -2.567991756122 | 1.156984268203  |
| H | -7.242384654027  | -2.504943652471 | -1.428176331548 |
| H | -5.736402772421  | -1.579068689342 | -1.376539178548 |
| H | -7.130448848901  | -0.950106624374 | -2.269656302513 |
| H | 10.671866197472  | -1.937267959548 | 0.557039452472  |
| H | 10.638997569758  | -1.820140020716 | -1.211691617641 |
| H | 9.481754131706   | -2.894133585003 | -0.370629683474 |
| H | 9.801405765673   | 2.931521000124  | 0.726682137146  |
| H | 8.297173449888   | 3.484895863105  | -0.064515904812 |
| H | 9.707402719161   | 2.985035636961  | -1.042752500579 |

## Dye 14b

|   |                  |                 |                 |
|---|------------------|-----------------|-----------------|
| N | -7.625574547364  | 1.470716266166  | -0.108747677305 |
| C | -8.794827874753  | 0.692135229078  | -0.177034225608 |
| C | -10.124714226102 | 1.104006545186  | -0.237838735730 |
| C | -11.108590360122 | 0.109605776315  | -0.299205665487 |
| C | -10.770974534412 | -1.245620679520 | -0.299579644574 |
| C | -9.425613452771  | -1.637666332952 | -0.237947909230 |
| C | -8.441238304605  | -0.662366997948 | -0.176807746742 |
| C | -6.926637660227  | -0.791601554427 | -0.103168703917 |
| C | -6.498116697455  | 0.688007223194  | -0.063106499948 |
| C | -5.232040914797  | 1.229545423010  | 0.004873282960  |

|   |                  |                  |                 |
|---|------------------|------------------|-----------------|
| C | -4.013440798210  | 0.508611038748   | 0.057170247778  |
| C | -2.773292255954  | 1.094009206888   | 0.125631961160  |
| C | -1.565395156694  | 0.332740175454   | 0.168115163214  |
| C | -0.285241271093  | 0.932307641768   | 0.260143363097  |
| C | 0.902303699216   | 0.128594071558   | 0.175780892049  |
| C | 2.195948447066   | 0.683279162060   | 0.138658428568  |
| C | 3.348882609568   | -0.089482474190  | 0.070715896277  |
| C | 4.656796727772   | 0.410204176523   | 0.022548084303  |
| C | 5.744641638846   | -0.455408083077  | -0.036788145752 |
| C | 7.123052644327   | -0.182375510038  | -0.088577290576 |
| C | 8.007976919119   | -1.336819711042  | -0.142709172986 |
| N | 9.391804847509   | -1.064977516404  | -0.191183107595 |
| C | 9.943370633396   | 0.207186378537   | -0.190537996607 |
| N | 9.065762234070   | 1.278119555215   | -0.140555465504 |
| C | 7.654793810016   | 1.165225621761   | -0.088365291587 |
| C | -7.600474029995  | 2.924180602583   | -0.088291638051 |
| C | -6.514948820309  | -1.544153775540  | 1.184737254782  |
| C | -6.388243836916  | -1.511104169207  | -1.362871424516 |
| C | -0.174851162019  | 2.341973861157   | 0.365717323134  |
| N | -0.085019226052  | 3.502702545239   | 0.458440266068  |
| O | -1.664918977151  | -0.979363664989  | 0.094161697027  |
| O | 0.768637066315   | -1.183718265780  | 0.099713003969  |
| B | -0.511496662395  | -1.877546380504  | 0.385364177876  |
| F | -0.605395537191  | -2.978460969483  | -0.444352996718 |
| F | -0.551772456061  | -2.2438754443121 | 1.725749642916  |
| O | 7.622710110915   | -2.511507466524  | -0.148106292495 |
| O | 11.160626951985  | 0.377092262215   | -0.233253895360 |
| O | 6.974903176260   | 2.197207761916   | -0.046995909903 |
| C | 10.339084035508  | -2.180494307060  | -0.246810992080 |
| C | 9.675797025869   | 2.609566175098   | -0.143748772913 |
| H | -10.405497632377 | 2.151212765538   | -0.238661943967 |
| H | -12.152427991568 | 0.404653773945   | -0.347273837565 |
| H | -11.551364765013 | -1.998301739418  | -0.347761574414 |
| H | -9.162970348427  | -2.691845595998  | -0.238224825039 |
| H | -5.149583214082  | 2.312548891433   | 0.020295053109  |
| H | -4.035923221723  | -0.575426615590  | 0.043467564238  |
| H | -2.682020663647  | 2.174991530434   | 0.146510556913  |
| H | 2.277869842515   | 1.764852523676   | 0.162294201833  |
| H | 3.219351962543   | -1.170987218980  | 0.055191122221  |
| H | 4.825047655114   | 1.480363659550   | 0.031897892903  |
| H | 5.517754035780   | -1.520609023407  | -0.044633432418 |
| H | -7.045678516605  | 3.311881769011   | -0.948493057106 |
| H | -7.128077129388  | 3.287938980335   | 0.829568074670  |
| H | -8.617987315847  | 3.306794221896   | -0.130165998397 |
| H | -6.890510623602  | -1.031452687734  | 2.074465130761  |
| H | -5.429987237312  | -1.632810247966  | 1.272673014255  |
| H | -6.936105805401  | -2.553849234846  | 1.169739075062  |
| H | -6.807285277202  | -2.520362184140  | -1.415802913317 |
| H | -5.299791483278  | -1.598601351867  | -1.344935760719 |
| H | -6.674505074402  | -0.975190091652  | -2.271919022095 |
| H | 11.008304286297  | -2.152664393984  | 0.615957941540  |
| H | 10.942016210270  | -2.120430392669  | -1.155610021346 |
| H | 9.756700342500   | -3.097818803033  | -0.241705295773 |
| H | 8.867928472848   | 3.334855681770   | -0.100309855580 |
| H | 10.265171467842  | 2.753752809376   | -1.051983045169 |
| H | 10.335352436301  | 2.725865025476   | 0.719038272327  |

## Dye 5-s

|   |                 |                 |                 |
|---|-----------------|-----------------|-----------------|
| O | 0.669080659123  | 0.124382848847  | 1.221406788047  |
| O | 0.669080659123  | 0.124382848847  | -1.221406788047 |
| C | -0.646617666998 | 0.158462759580  | 1.235864910635  |
| C | -0.646617666998 | 0.158462759580  | -1.235864910635 |
| C | -1.353387202937 | 0.225554888685  | 0.000000000000  |
| B | 1.466594028314  | 0.428134184474  | 0.000000000000  |
| F | 2.582460943806  | -0.382479494047 | 0.000000000000  |
| F | 1.804915369008  | 1.773507053539  | 0.000000000000  |
| C | -2.770650026323 | 0.285515978645  | 0.000000000000  |
| N | -3.936806349155 | 0.340092408574  | 0.000000000000  |
| C | -1.306731237716 | 0.097532679401  | 2.492985193871  |
| C | -1.306731237716 | 0.097532679401  | -2.492985193871 |
| C | -0.620137764460 | 0.049372740526  | 3.686796055146  |
| C | -0.620137764460 | 0.049372740526  | -3.686796055146 |
| C | -1.237440070218 | -0.020022610595 | 4.953542728721  |
| C | -1.237440070218 | -0.020022610595 | -4.953542728721 |
| C | -0.589684587467 | -0.070043286064 | 6.174819085160  |
| C | -0.589684587467 | -0.070043286064 | -6.174819085160 |
| C | 0.920304721696  | -0.073541351413 | 6.478743994629  |
| C | 0.920304721696  | -0.073541351413 | -6.478743994629 |
| C | 0.918352967832  | -0.152980765861 | 7.998004891368  |
| C | 0.918352967832  | -0.152980765861 | -7.998004891368 |

|   |                 |                 |                  |
|---|-----------------|-----------------|------------------|
| C | -0.401282664568 | -0.183073371002 | 8.461579560550   |
| C | -0.401282664568 | -0.183073371002 | -8.461579560550  |
| N | -1.274555303021 | -0.129517264661 | 7.357158489658   |
| N | -1.274555303021 | -0.129517264661 | -7.357158489658  |
| C | 1.971935477694  | -0.195018058294 | 8.899678314022   |
| C | 1.971935477694  | -0.195018058294 | -8.899678314022  |
| C | 1.690453028273  | -0.267637390318 | 10.271478996062  |
| C | 1.690453028273  | -0.267637390318 | -10.271478996062 |
| C | 0.367421995144  | -0.297151270287 | 10.718735849758  |
| C | 0.367421995144  | -0.297151270287 | -10.718735849758 |
| C | -0.704463376196 | -0.255554794673 | 9.819227132476   |
| C | -0.704463376196 | -0.255554794673 | -9.819227132476  |
| C | -2.726749688125 | -0.138168398793 | 7.454156573564   |
| C | -2.726749688125 | -0.138168398793 | -7.454156573564  |
| C | 1.600777053542  | 1.235796064675  | 6.011403700143   |
| C | 1.624955453097  | -1.313248002620 | -5.877589590834  |
| C | 1.624955453097  | -1.313248002620 | 5.877589590834   |
| C | 1.600777053542  | 1.235796064675  | -6.011403700143  |
| H | -2.391470656229 | 0.086990606571  | 2.488795798134   |
| H | -2.391470656229 | 0.086990606571  | -2.488795798134  |
| H | 0.461980839167  | 0.068276942149  | 3.621312429082   |
| H | 0.461980839167  | 0.068276942149  | -3.621312429082  |
| H | -2.323305186326 | -0.035916235957 | 4.960885449350   |
| H | -2.323305186326 | -0.035916235957 | -4.960885449350  |
| H | 3.001242065928  | -0.172719621243 | 8.553298889727   |
| H | 3.001242065928  | -0.172719621243 | -8.553298889727  |
| H | 2.504555802590  | -0.301398350048 | 10.988305672620  |
| H | 2.504555802590  | -0.301398350048 | -10.988305672620 |
| H | 0.159721491806  | -0.353894966277 | 11.782815569333  |
| H | 0.159721491806  | -0.353894966277 | -11.782815569333 |
| H | -1.725220677338 | -0.280843572670 | 10.183421044271  |
| H | -1.725220677338 | -0.280843572670 | -10.183421044271 |
| H | -3.145604699267 | 0.761070112118  | 6.992990877973   |
| H | -3.145604699267 | 0.761070112118  | -6.992990877973  |
| H | -3.140603810219 | -1.019586062553 | -6.955004735837  |
| H | -3.140603810219 | -1.019586062553 | 6.955004735837   |
| H | -3.145604699267 | 0.761070112118  | -6.992990877973  |
| H | -3.145604699267 | 0.761070112118  | 6.992990877973   |
| H | -3.020690774482 | -0.160038953175 | 8.501102115911   |
| H | -3.020690774482 | -0.160038953175 | -8.501102115911  |
| H | 1.597042273980  | 1.328031664468  | 4.923247325924   |
| H | 1.624237036772  | -1.290573715311 | -4.785784555358  |
| H | 1.097250279952  | 2.110368976297  | 6.432045054924   |
| H | 1.137667181905  | -2.236491266746 | -6.202389907763  |
| H | 2.641585526245  | 1.246782424669  | 6.347855230070   |
| H | 2.665548688246  | -1.340345068707 | -6.213820083424  |
| H | 2.665548688246  | -1.340345068707 | 6.213820083424   |
| H | 2.641585526245  | 1.246782424669  | -6.347855230070  |
| H | 2.641585526245  | 1.246782424669  | 6.347855230070   |
| H | 1.137667181905  | -2.236491266746 | 6.202389907763   |
| H | 1.097250279952  | 2.110368976297  | -6.432045054924  |
| H | 1.624237036772  | -1.290573715311 | 4.785784555358   |
| H | 1.597042273980  | 1.328031664468  | -4.923247325924  |

## Dye 5a-s

|   |                 |                 |                 |
|---|-----------------|-----------------|-----------------|
| C | -0.615153258740 | 0.112407173465  | 0.000000032061  |
| C | 0.085184652681  | 0.012572454231  | 1.240601782570  |
| C | 0.085184938437  | 0.012573732670  | -1.240601660859 |
| O | 1.404803329183  | -0.077863985514 | 1.219403121895  |
| O | 1.404803604356  | -0.077862817091 | -1.219402804389 |
| B | 2.193834585044  | 0.230514532071  | 0.000000389827  |
| F | 2.535207680349  | 1.580627597891  | 0.000001067430  |
| F | 3.320274721267  | -0.572732299043 | 0.000000131466  |
| C | -2.025834741723 | 0.239733254312  | -0.000000051461 |
| N | -3.189089342277 | 0.350943581772  | -0.000000050791 |
| C | -0.570623850504 | -0.021814965053 | 2.492633666716  |
| C | -0.570623268409 | -0.021812309959 | -2.492633735509 |
| C | 0.128587412921  | -0.089689798957 | 3.684919285698  |
| C | 0.128588266483  | -0.089685863995 | -3.684919269823 |
| C | -0.410275473103 | -0.139134386461 | 4.985003527990  |
| C | -0.410274325847 | -0.139129024308 | -4.985003686743 |
| C | 0.437792654597  | -0.199234601882 | 6.119164402610  |
| N | 1.137249851560  | -0.248757285364 | 7.055563230110  |
| C | -1.809109654342 | -0.130462686384 | 5.221322826501  |
| N | -2.963986680530 | -0.123151108894 | 5.404086815613  |
| C | 0.437794048449  | -0.199228015742 | -6.119164455528 |
| N | 1.137251433800  | -0.248749695374 | -7.055563177192 |
| C | -1.809108453110 | -0.130457052763 | -5.221323292177 |
| N | -2.963985436964 | -0.123145267307 | -5.404087556461 |
| H | -1.654579986145 | 0.006122870072  | 2.495021007541  |
| H | -1.654579404050 | 0.006125569987  | -2.495021309172 |
| H | 1.213316720973  | -0.106583642929 | 3.621498323758  |
| H | 1.213317557073  | -0.106579804277 | -3.621498075044 |

## Dye 5b-s

|   |                 |                 |                 |
|---|-----------------|-----------------|-----------------|
| C | -0.315720315858 | 0.298526796165  | 0.000000099877  |
| C | 0.357244692130  | 0.083540249197  | 1.241372201143  |
| C | 0.357244528085  | 0.083540019534  | -1.241372052974 |
| O | 1.644744607835  | -0.212360839310 | 1.218855195896  |
| O | 1.644744438498  | -0.212361042514 | -1.218855211772 |
| B | 2.473160319669  | -0.036138103996 | -0.000000091659 |
| F | 3.027279735038  | 1.241743323732  | -0.000000229936 |
| F | 3.456553346611  | -1.009775285694 | -0.000000074812 |
| C | -1.688512535301 | 0.652652510181  | 0.000000190944  |
| N | -2.817415430691 | 0.953594870839  | -0.000000911121 |
| C | -0.309364167363 | 0.144342921486  | 2.492720308907  |
| C | -0.309364524557 | 0.144342589163  | -2.492720065485 |
| C | 0.368148062314  | -0.048220272966 | 3.681065298378  |
| C | 0.368147535254  | -0.048220829766 | -3.681065113165 |
| H | -1.371024410766 | 0.344400391344  | 2.496170110645  |
| H | -1.371024728272 | 0.344400265929  | -2.496169761388 |
| H | 1.434964368585  | -0.240939781086 | 3.605512635789  |
| H | 1.434963823533  | -0.240940476954 | -3.605512477036 |
| C | -0.110168162611 | -0.037347412073 | 5.010304243696  |
| C | -1.497764875493 | 0.196133519484  | 5.336384037129  |
| C | 0.873356031496  | -0.275451756575 | 6.050743583517  |
| N | -1.831054391437 | 0.163507819053  | 6.716299599364  |
| N | 0.394987059770  | -0.264884143535 | 7.382229637690  |
| C | -0.926717826068 | -0.056571409107 | 7.740673509497  |
| C | -0.110168628287 | -0.037347765616 | -5.010304100818 |
| C | 0.873355687531  | -0.275452163513 | -6.050743266011 |
| C | -1.497765224750 | 0.196133648074  | -5.336384142964 |
| N | 0.394986899959  | -0.264884754734 | -7.382229426019 |
| N | -1.831054375562 | 0.163508779510  | -6.716299863952 |
| C | -0.926717773150 | -0.056571135522 | -7.740673509497 |
| O | 2.076560222866  | -0.481547559540 | 5.848892626127  |
| O | -1.280209609553 | -0.066969518208 | 8.920234786355  |
| O | -2.396882562538 | 0.415780736863  | 4.514741529493  |
| O | 2.076559482018  | -0.481549982643 | -5.848891991114 |
| O | -1.280209307922 | -0.066968839803 | -8.920234892190 |
| O | -2.396882779501 | 0.415782683706  | -4.514741989877 |
| C | 1.333762569406  | -0.495387018889 | 8.481140915066  |
| H | 2.322345560427  | -0.602318800122 | 8.042620407326  |
| H | 1.315346656088  | 0.346790797693  | 9.176240896724  |
| H | 1.064946818831  | -1.401967272510 | 9.029006270285  |
| C | -3.220951358444 | 0.382402597714  | 7.119616802284  |
| H | -3.810334764679 | 0.473770318242  | 6.211307232339  |
| H | -3.574311540838 | -0.457793674971 | 7.720549533730  |
| H | -3.308282019607 | 1.294433354245  | 7.715791542331  |
| C | 1.333762394777  | -0.495388681035 | -8.481140491724 |
| H | 2.322345248213  | -0.602321049125 | -8.042619825231 |
| H | 1.064946046233  | -1.401968902376 | -9.029005582355 |
| H | 1.315347206432  | 0.346788936047  | -9.176240685053 |
| C | -3.220951025062 | 0.382405046217  | -7.119617331462 |
| H | -3.810334547717 | 0.473773099069  | -6.211307814434 |
| H | -3.308280638455 | 1.294436047757  | -7.715791806919 |
| H | -3.574311895387 | -0.457790719516 | -7.720550380413 |



# NMR Spectra of the Synthesized Compounds

## Intermediate Dyes

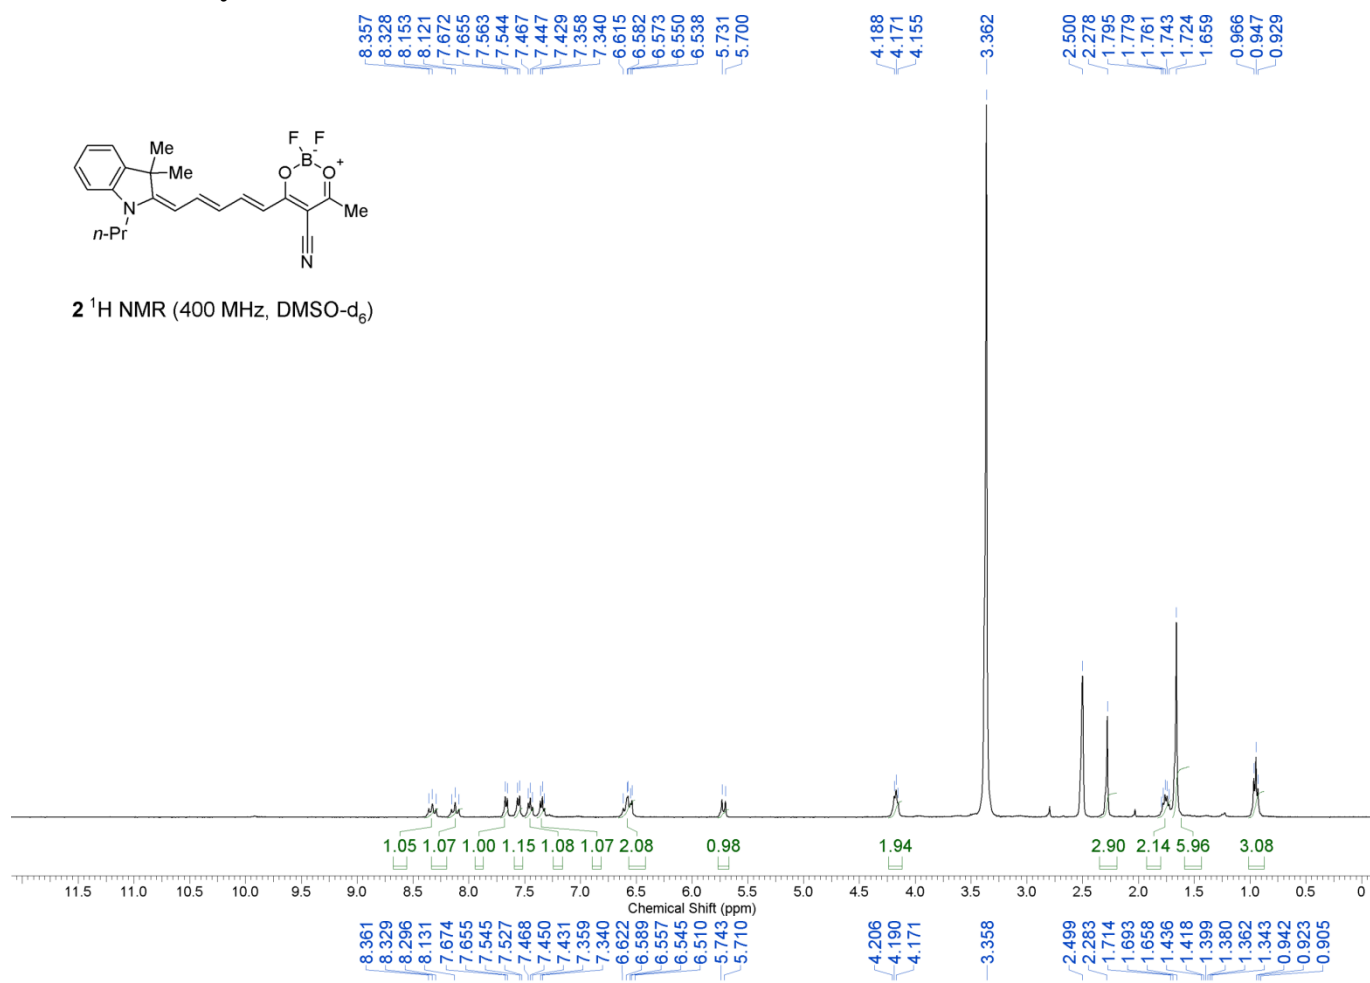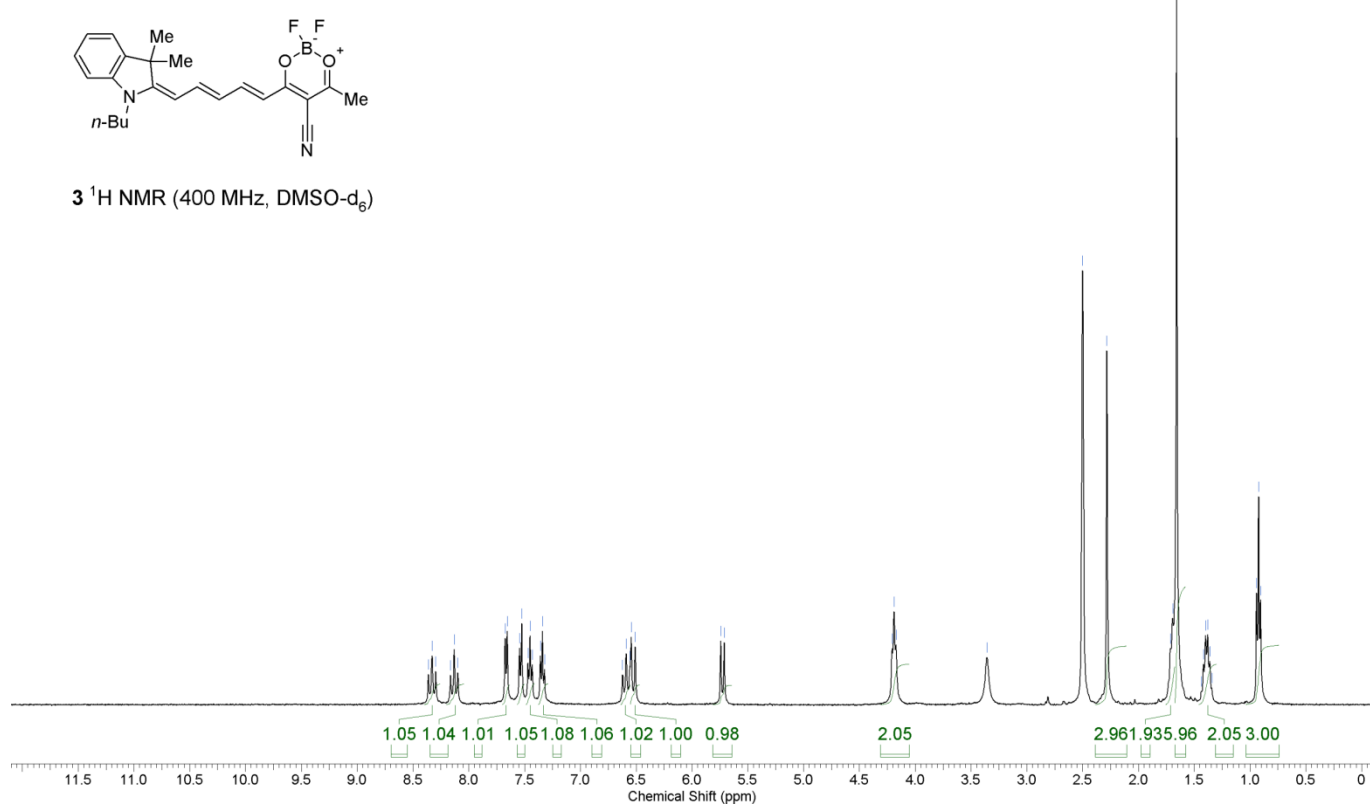

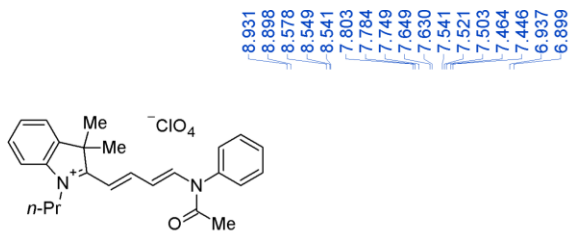

**9**  $^1\text{H}$  NMR (400 MHz,  $\text{DMSO-d}_6$ )

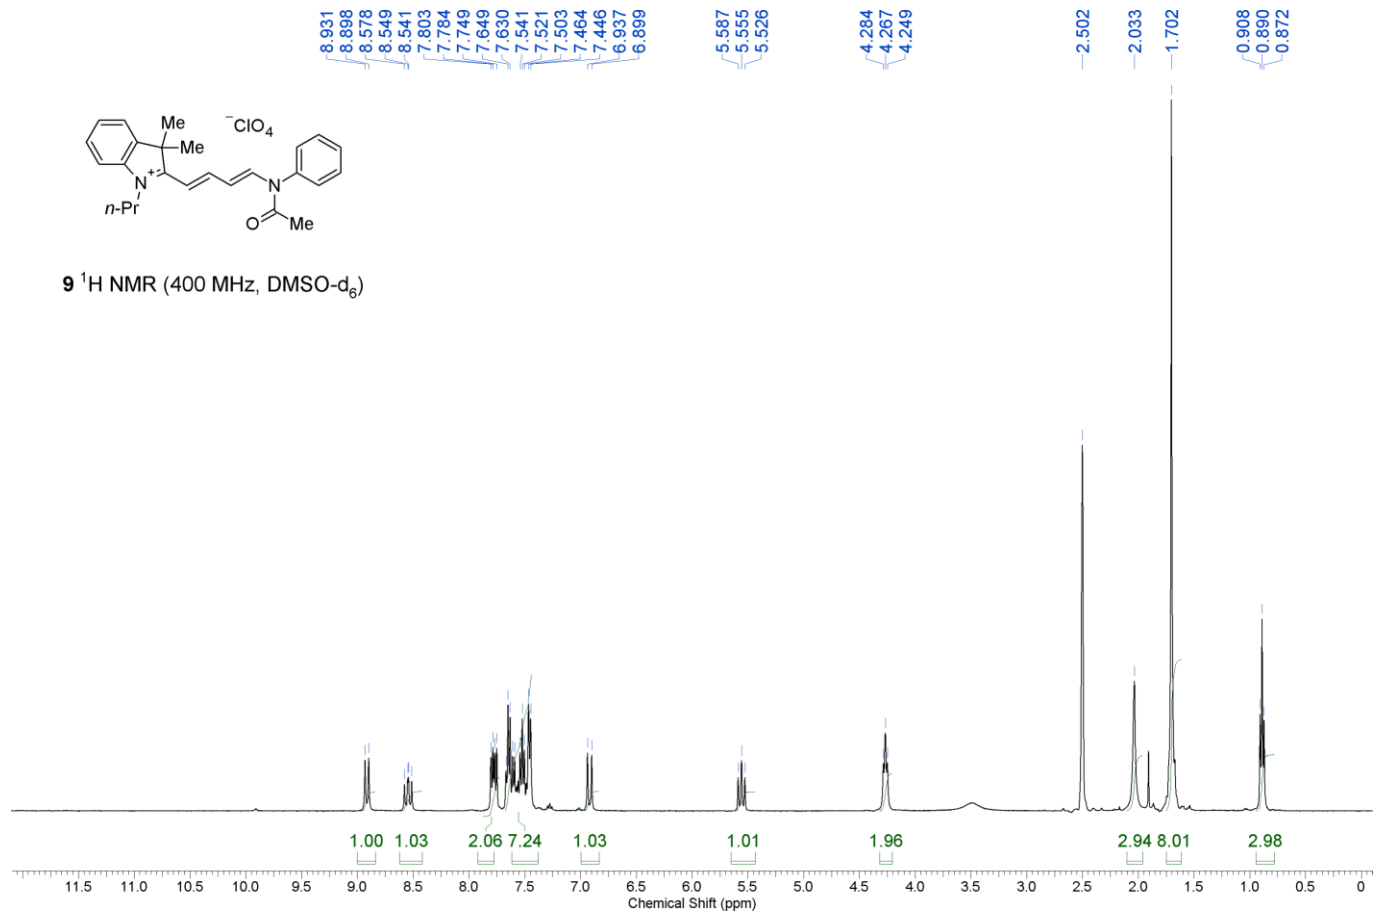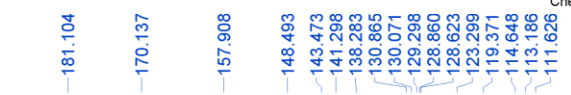

**9**  $^{13}\text{C}$  NMR (76 MHz,  $\text{DMSO-d}_6$ )

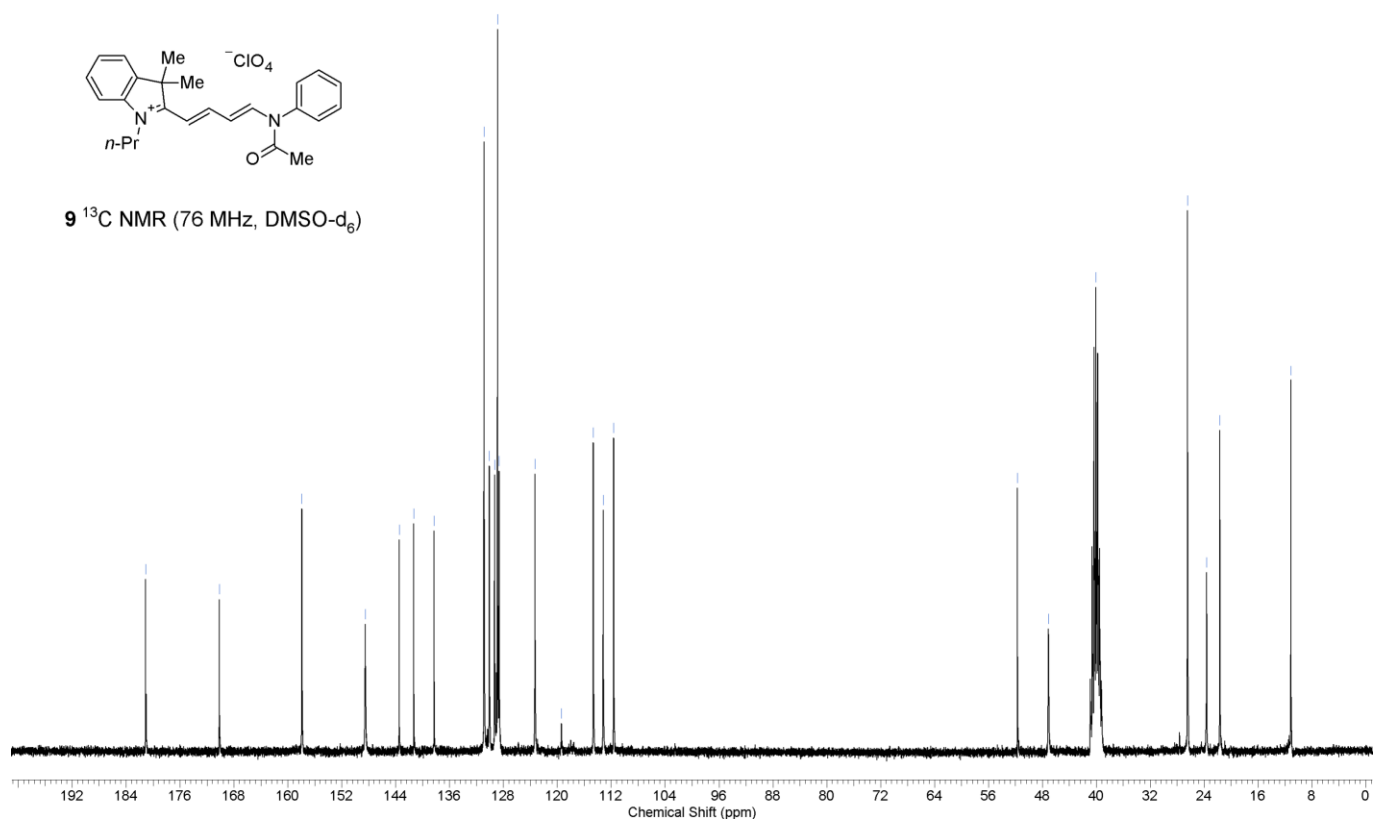

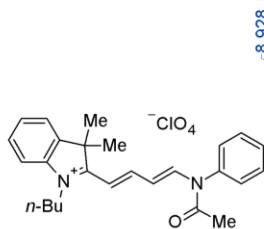

**10**  $^1\text{H}$  NMR (400 MHz,  $\text{DMSO-d}_6$ )

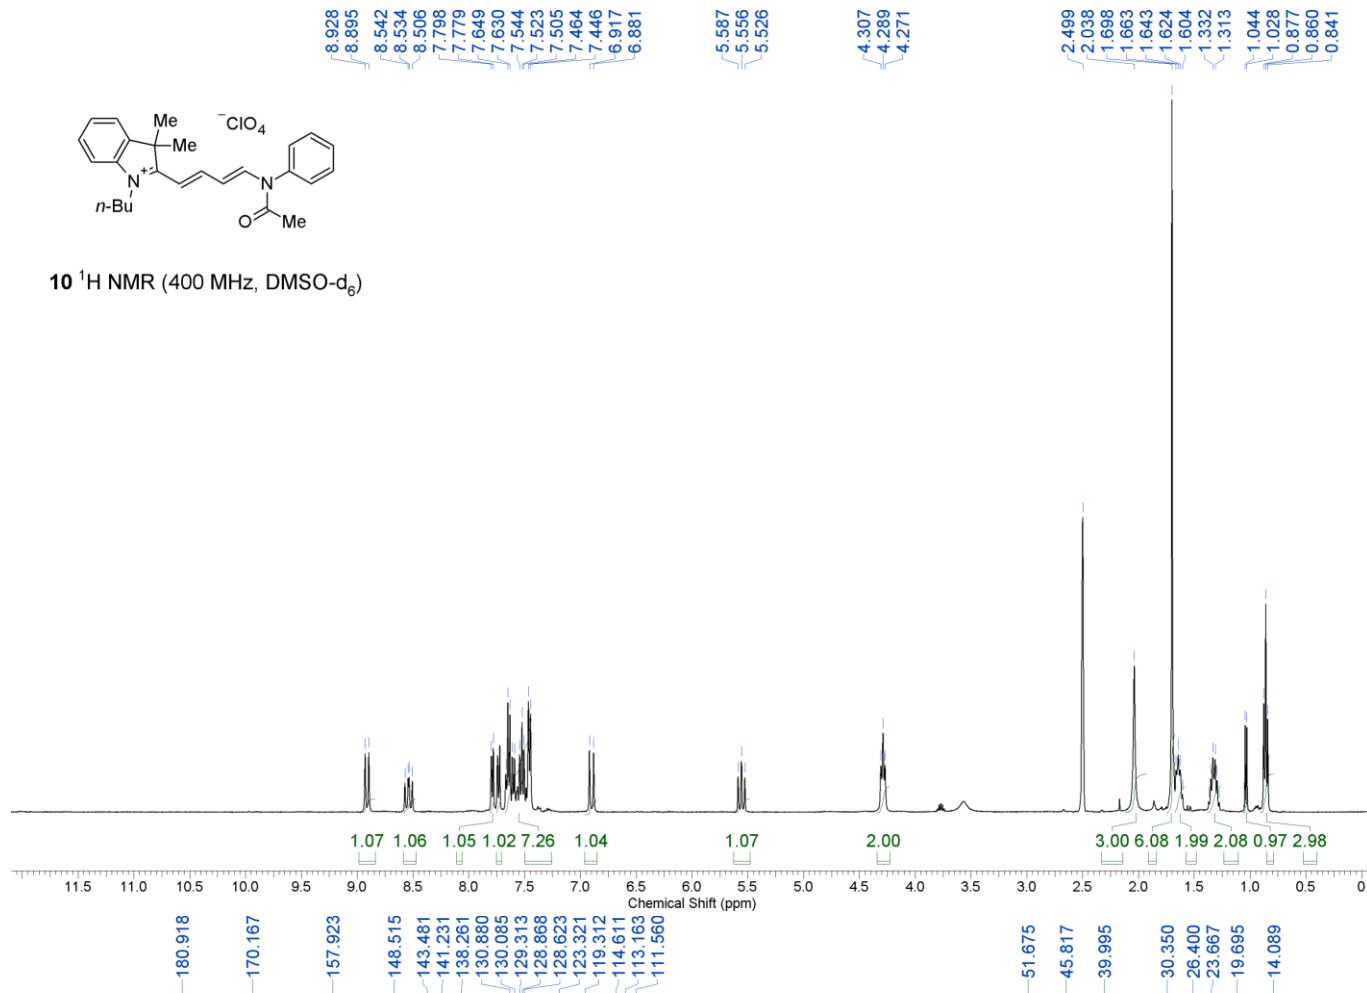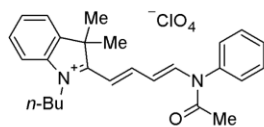

**10**  $^{13}\text{C}$  NMR (76 MHz,  $\text{DMSO-d}_6$ )

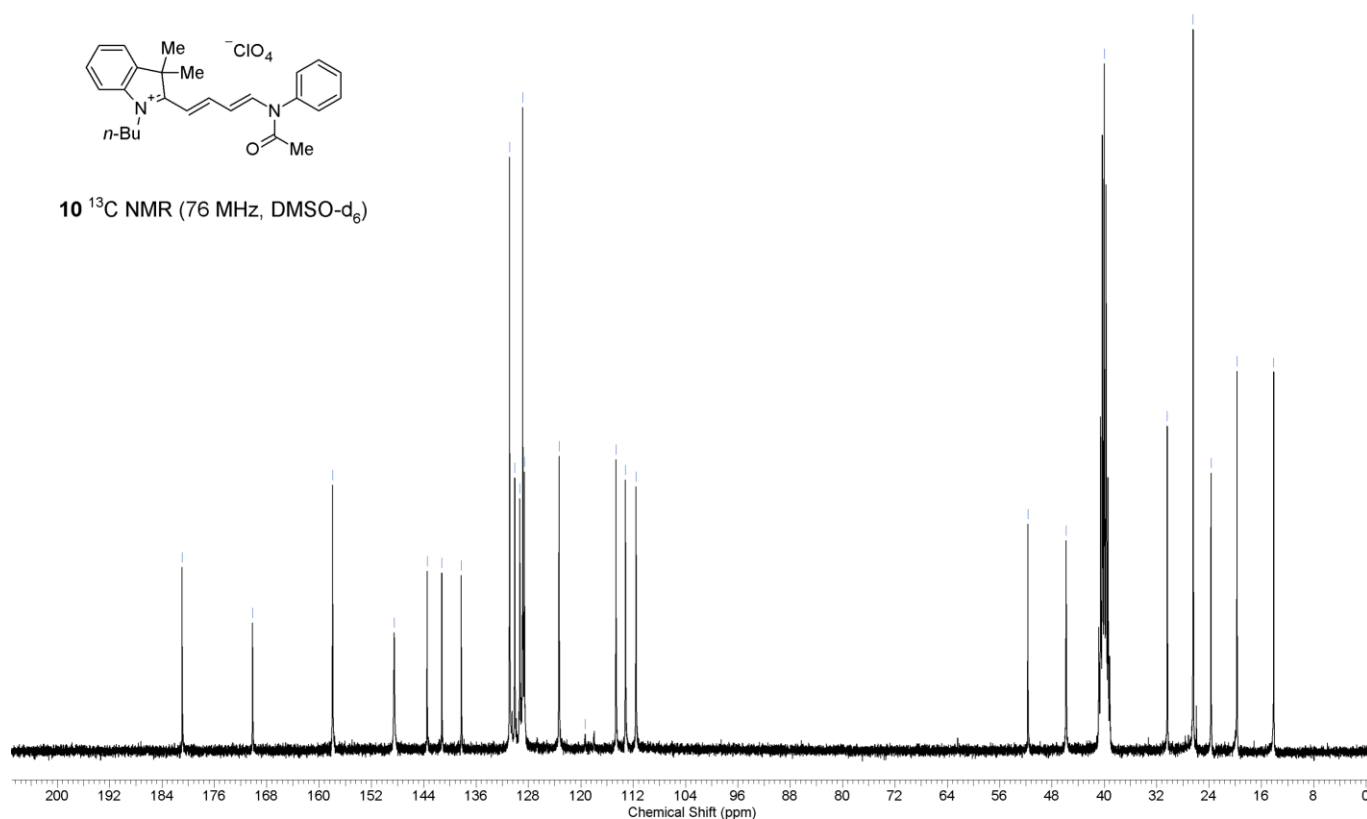

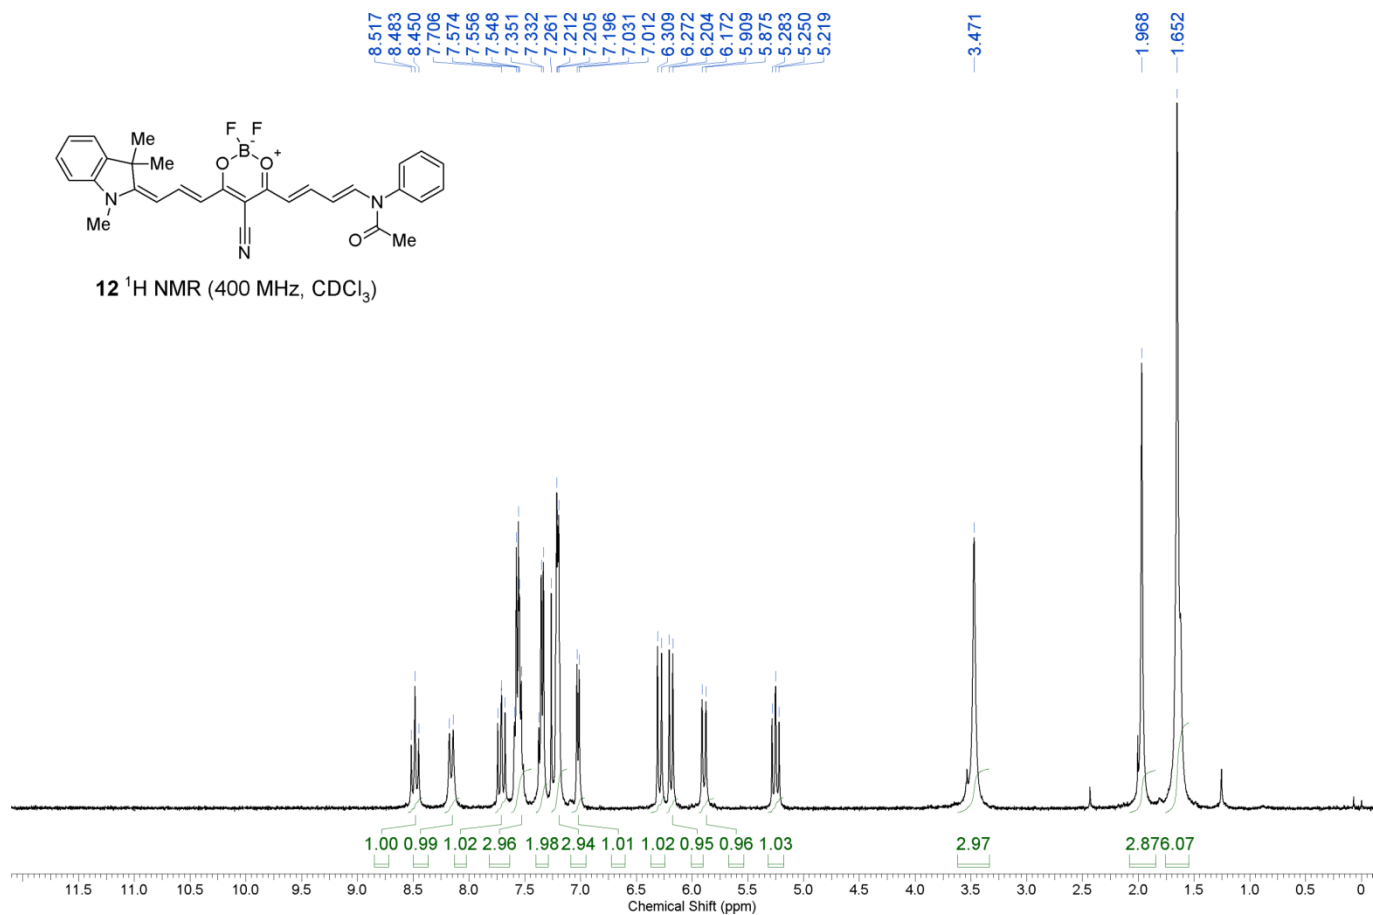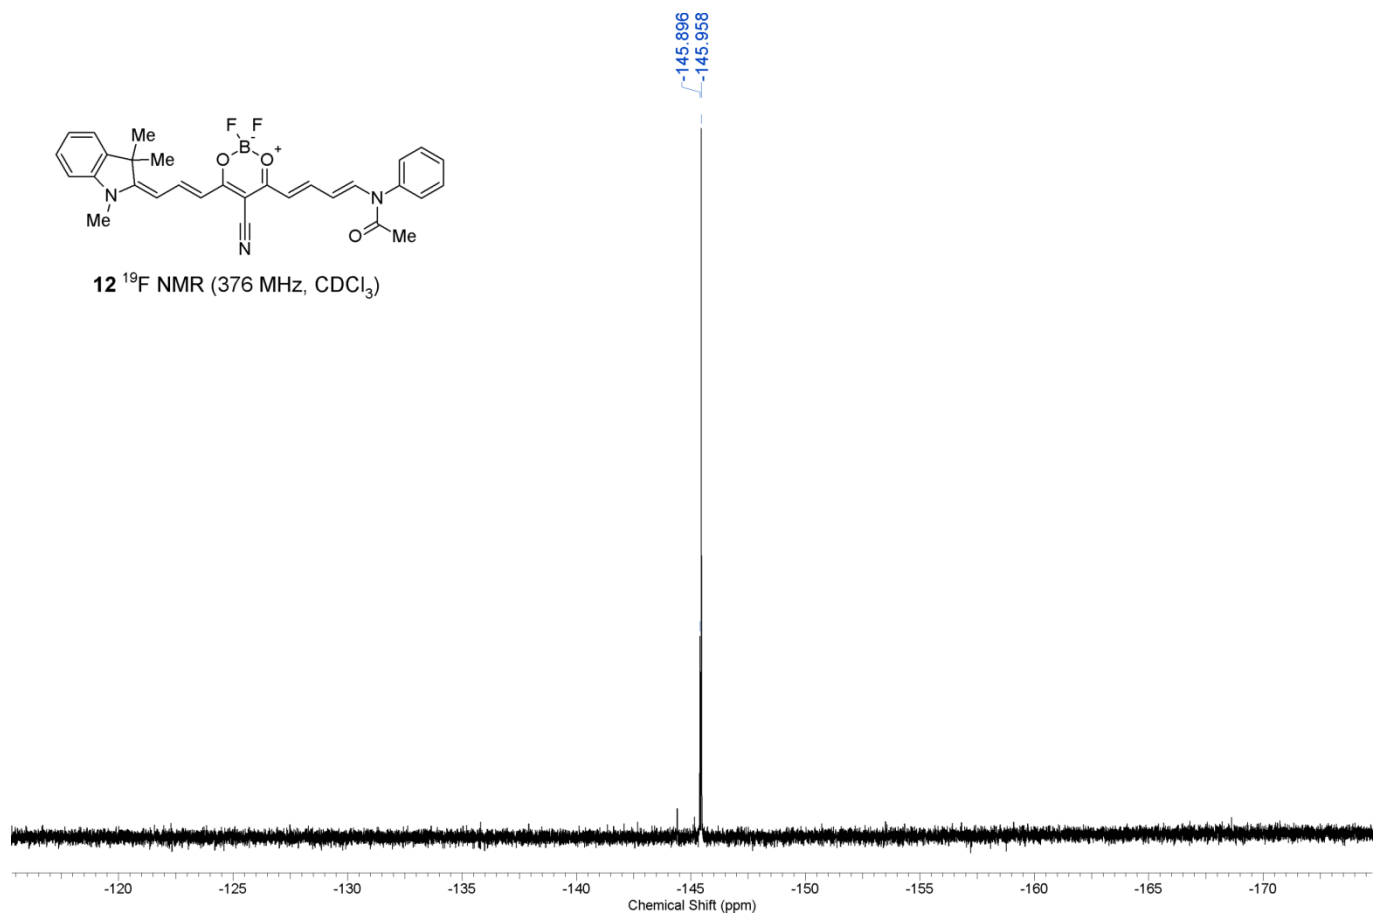

# Mero-Anionic Dyes 5a-d

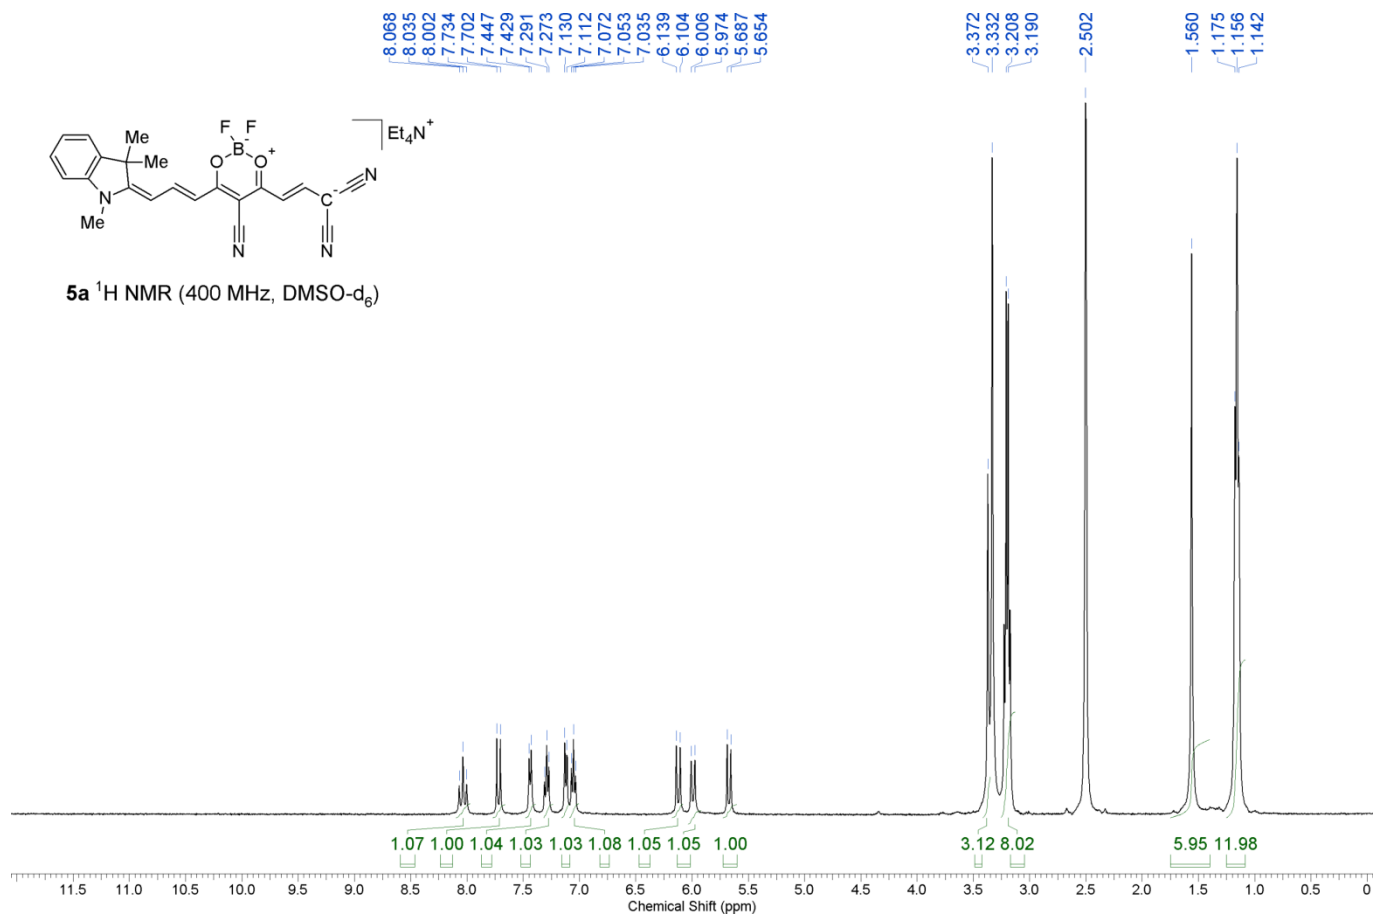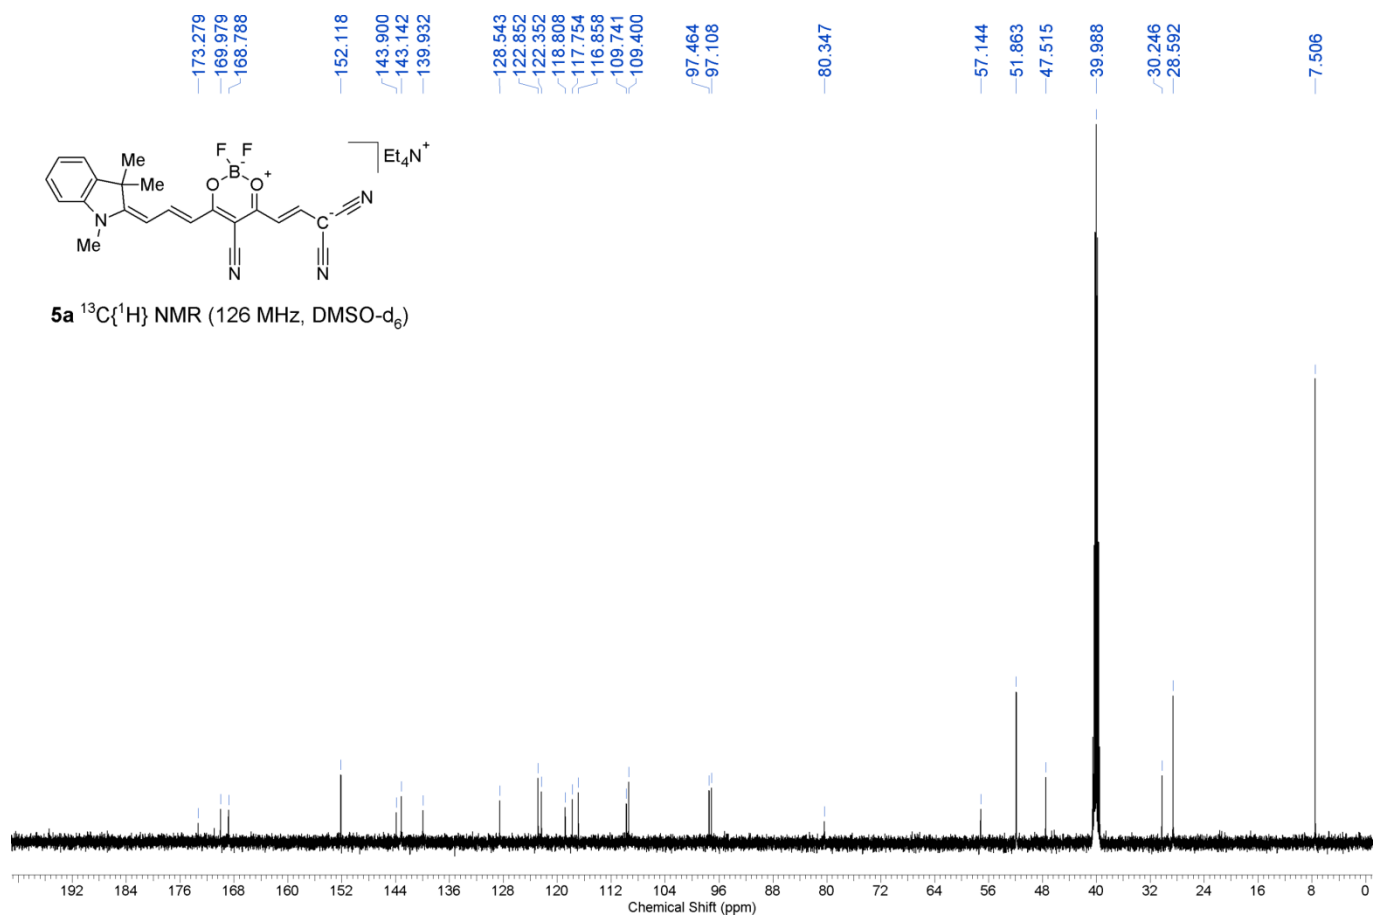

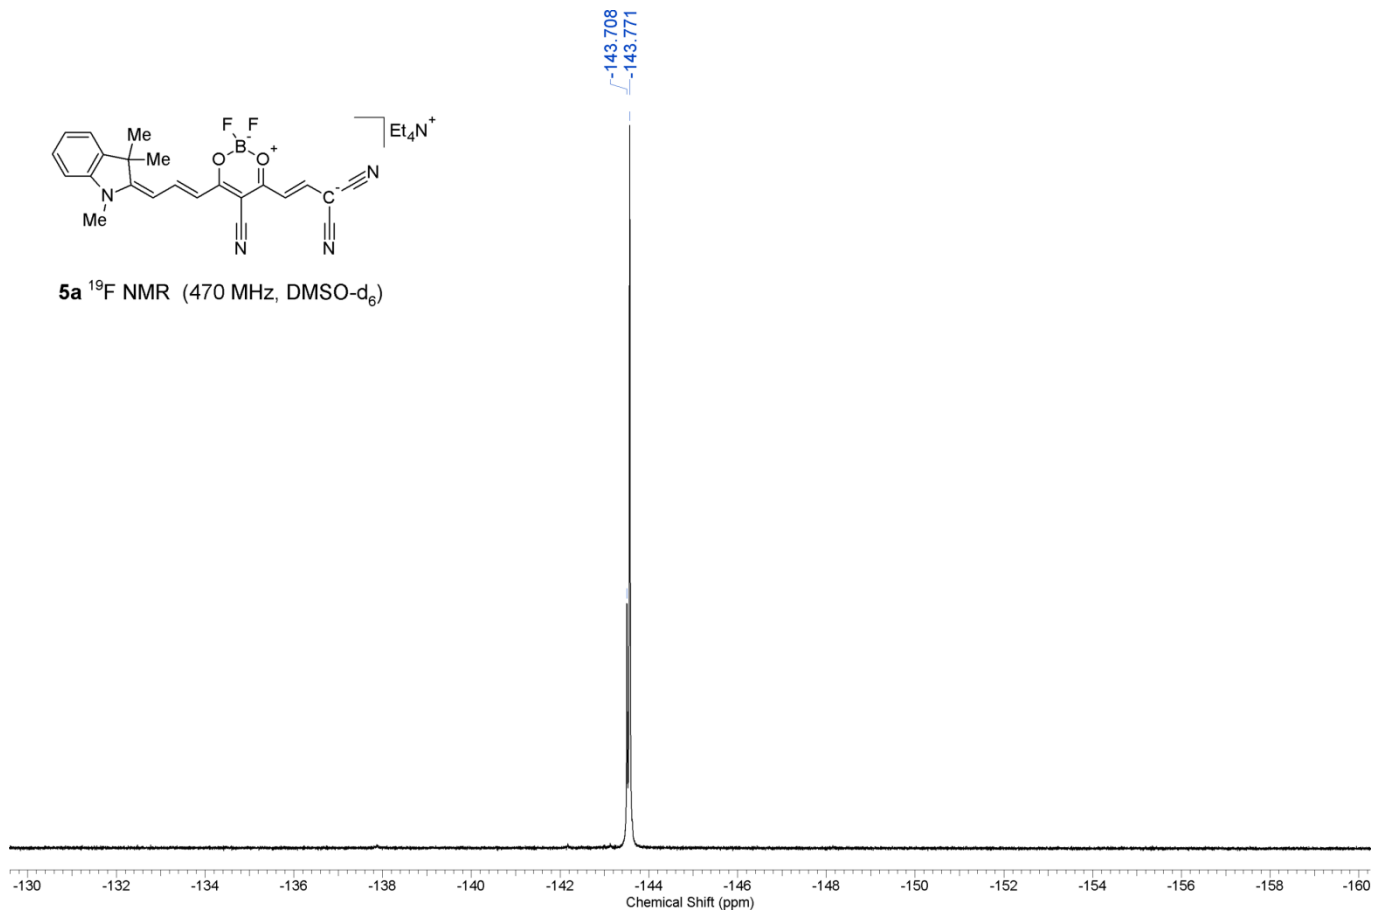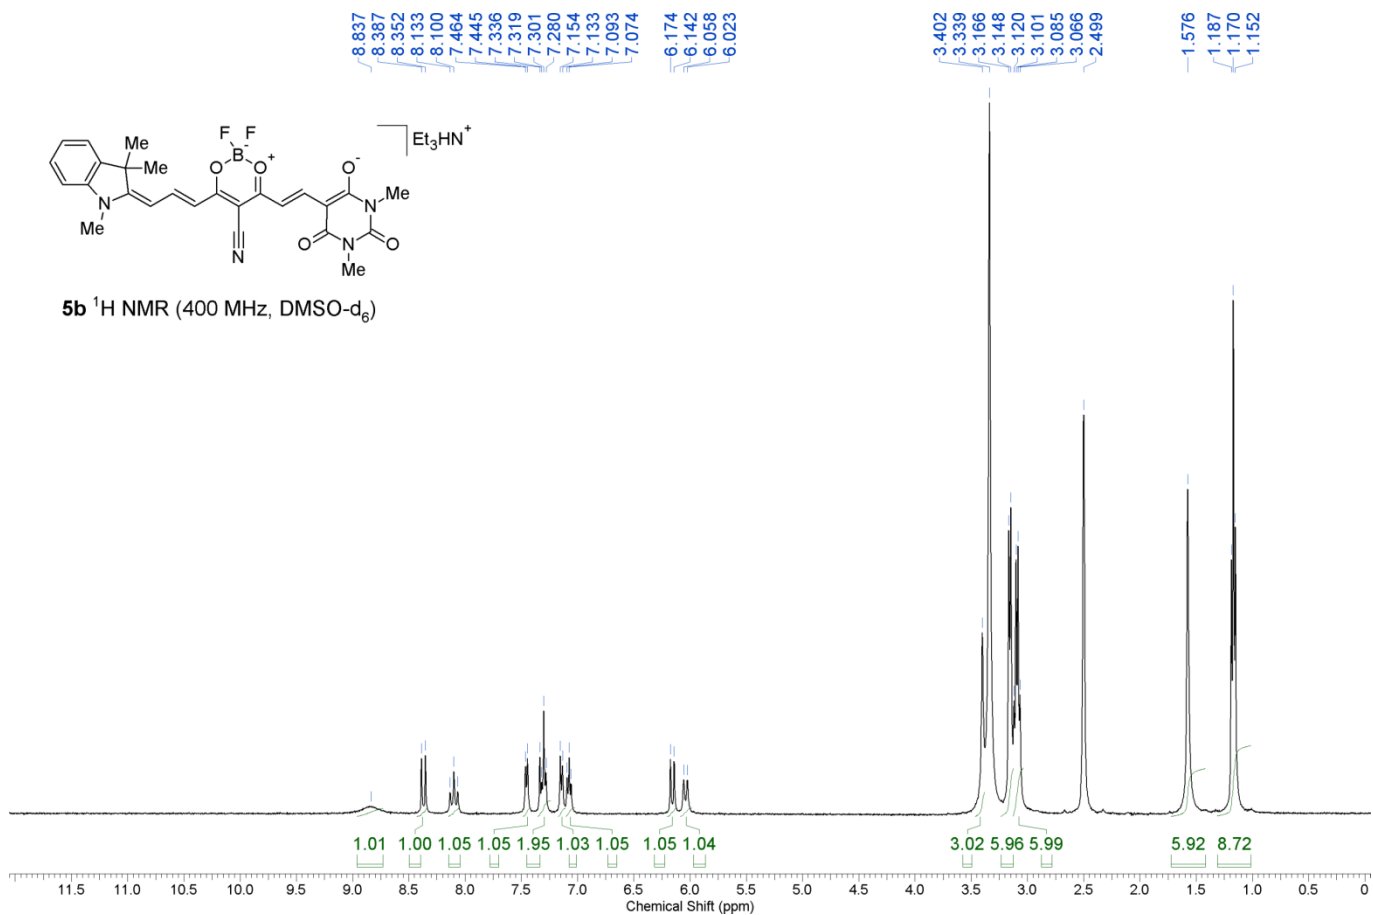

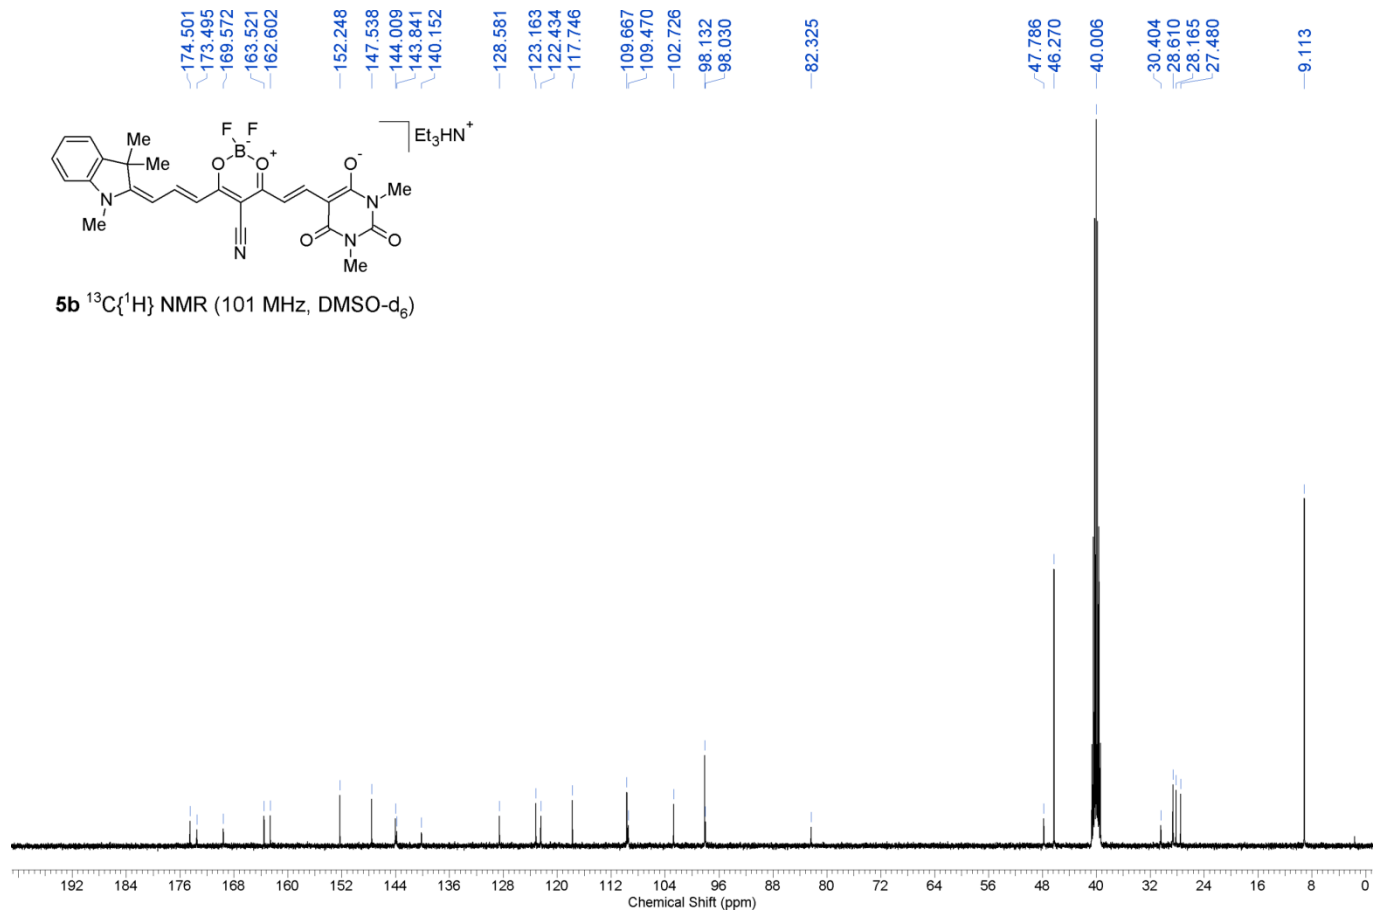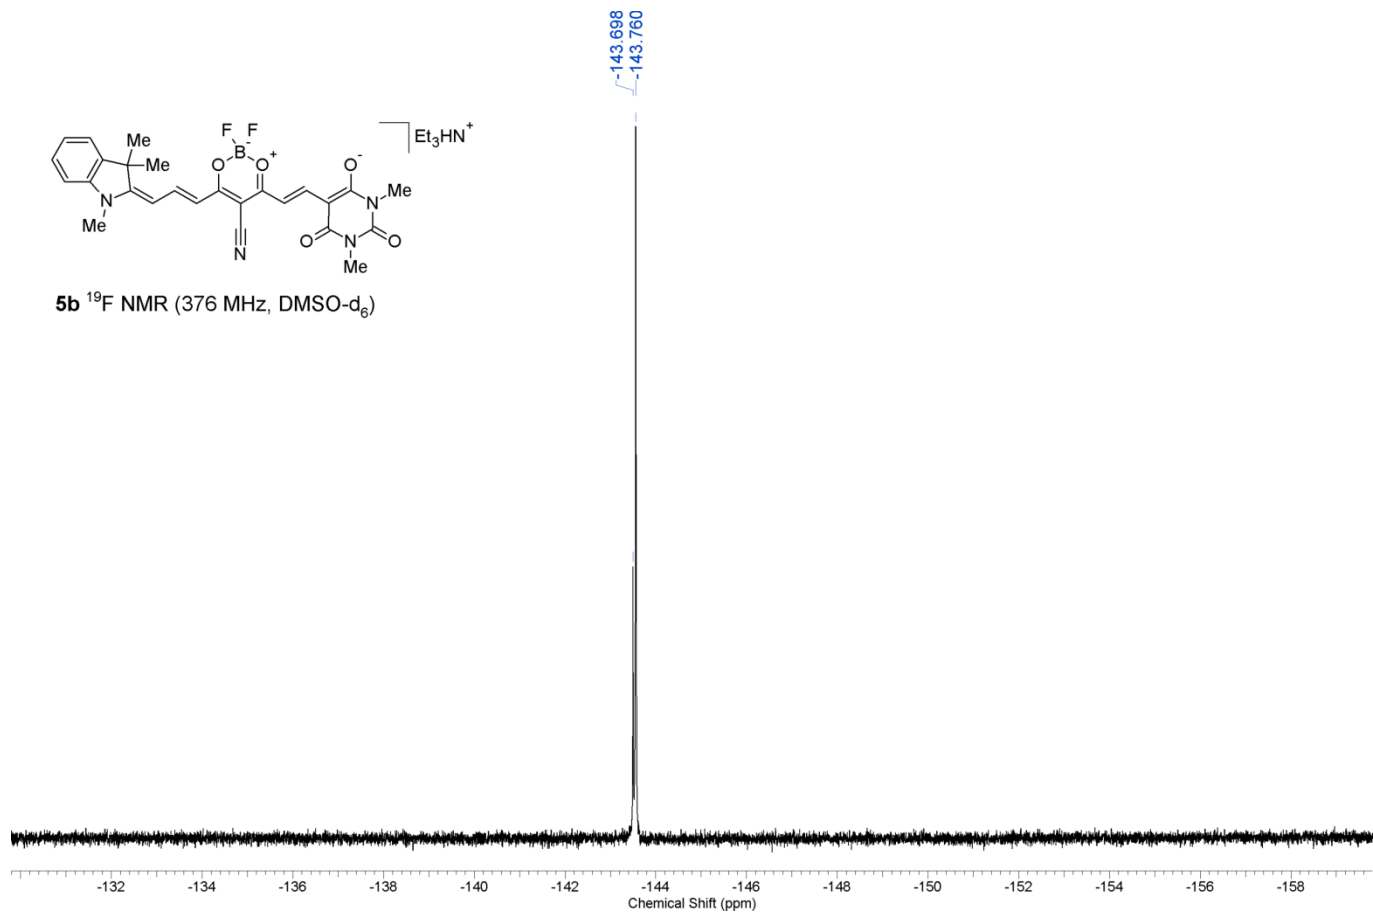



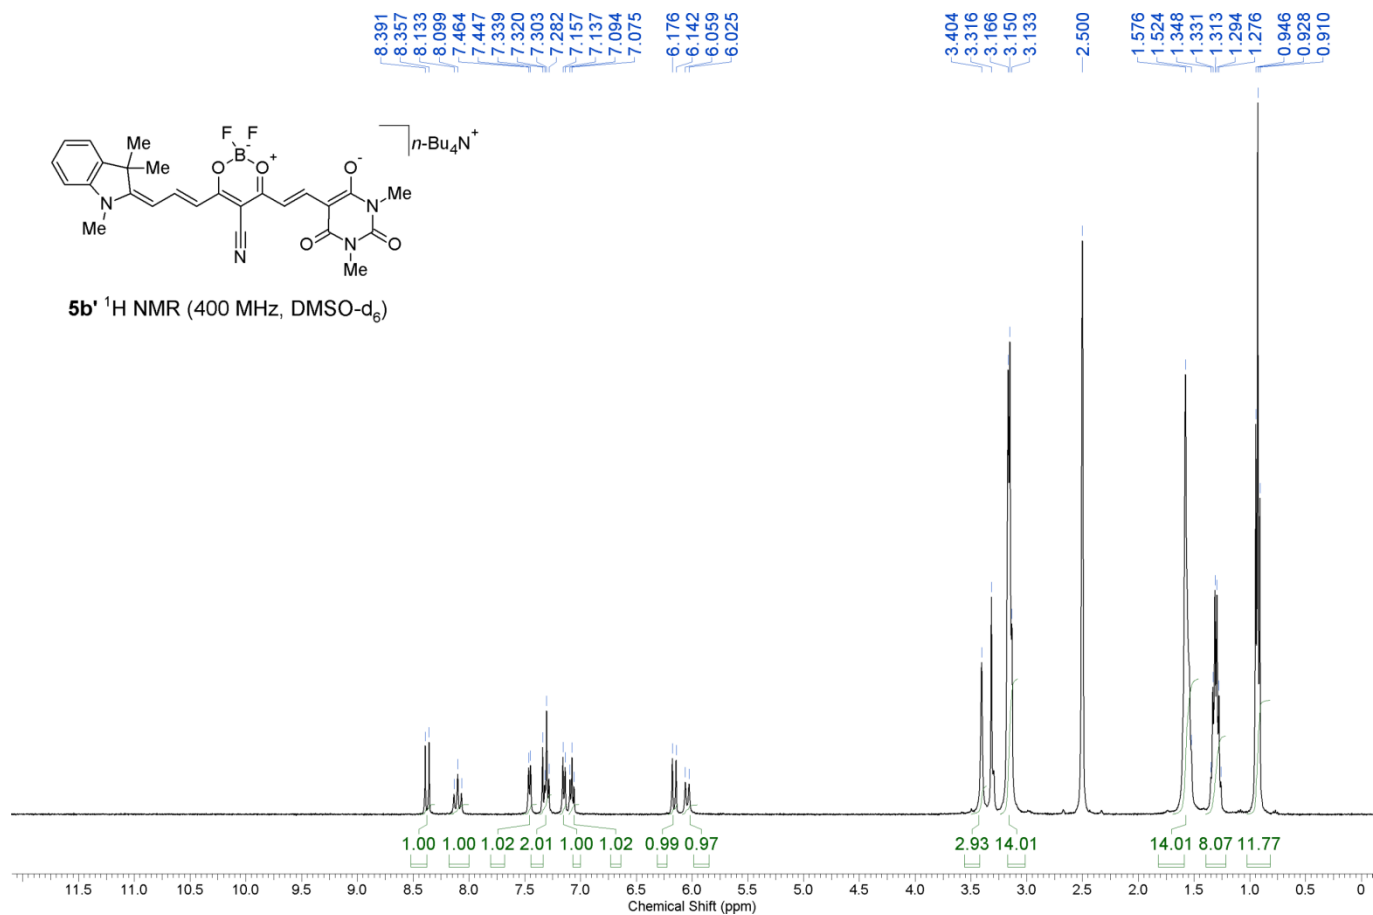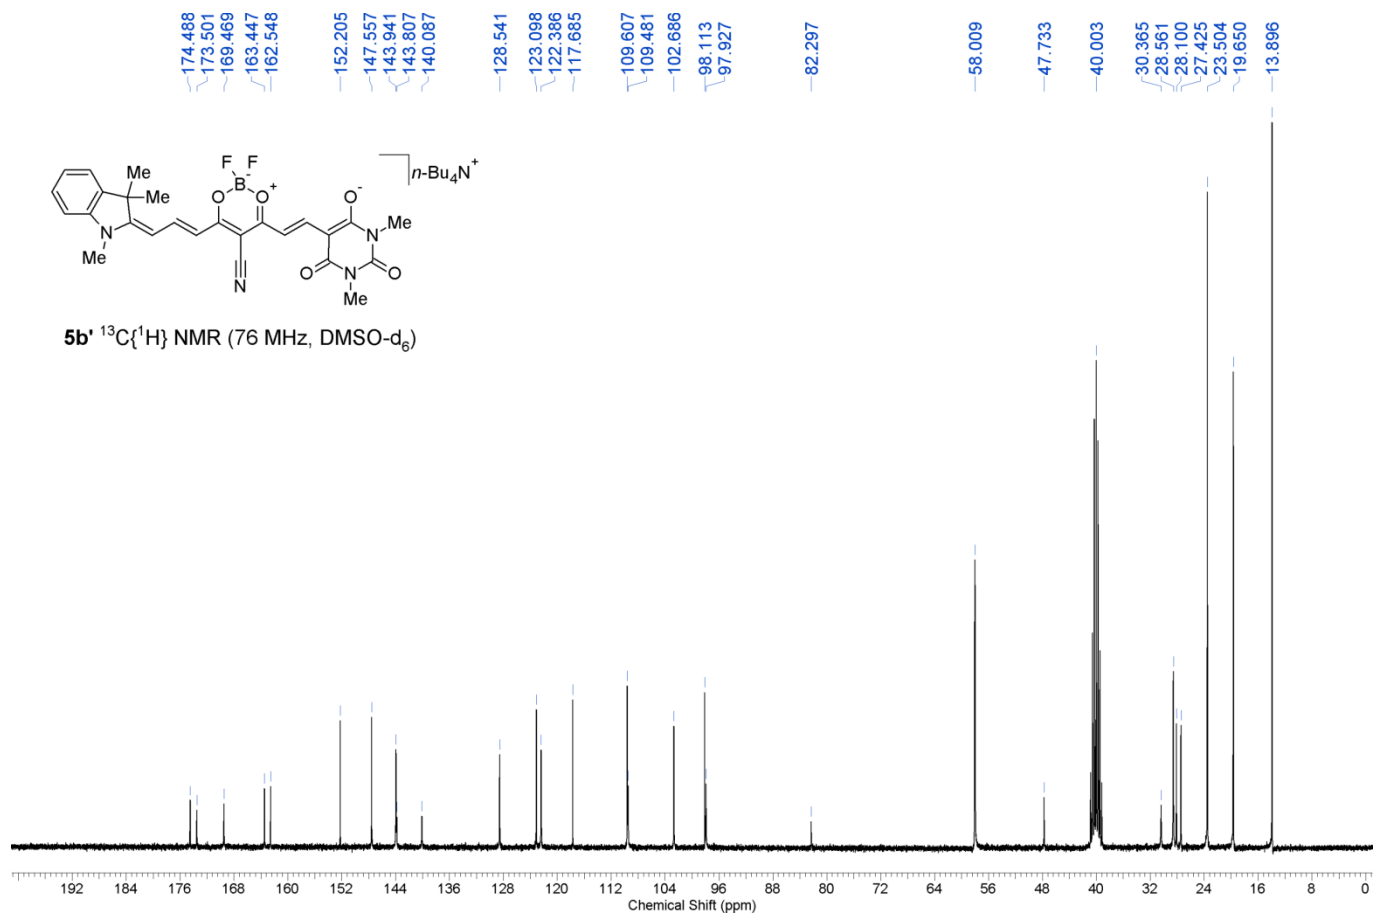

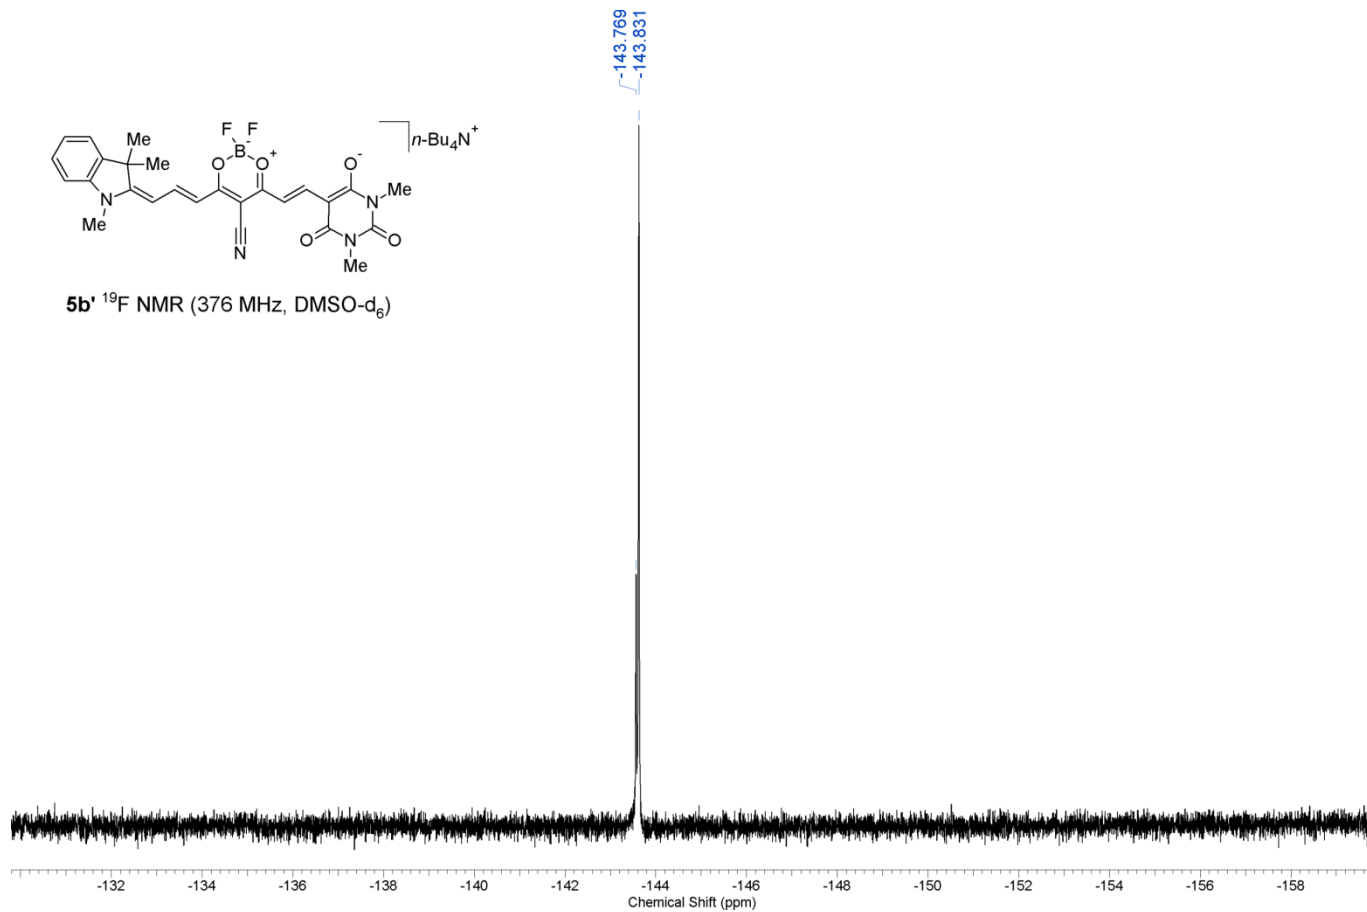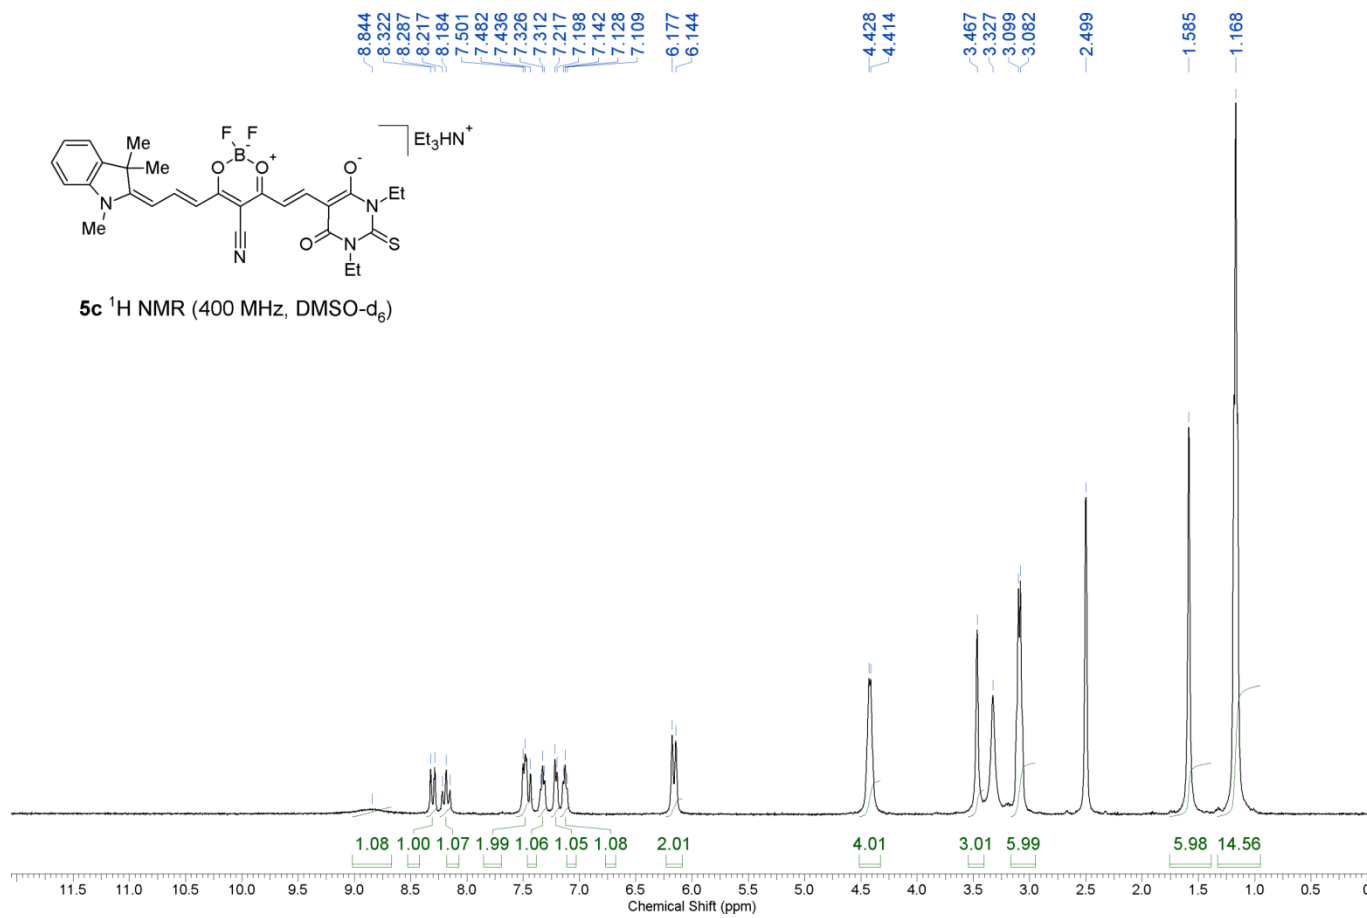

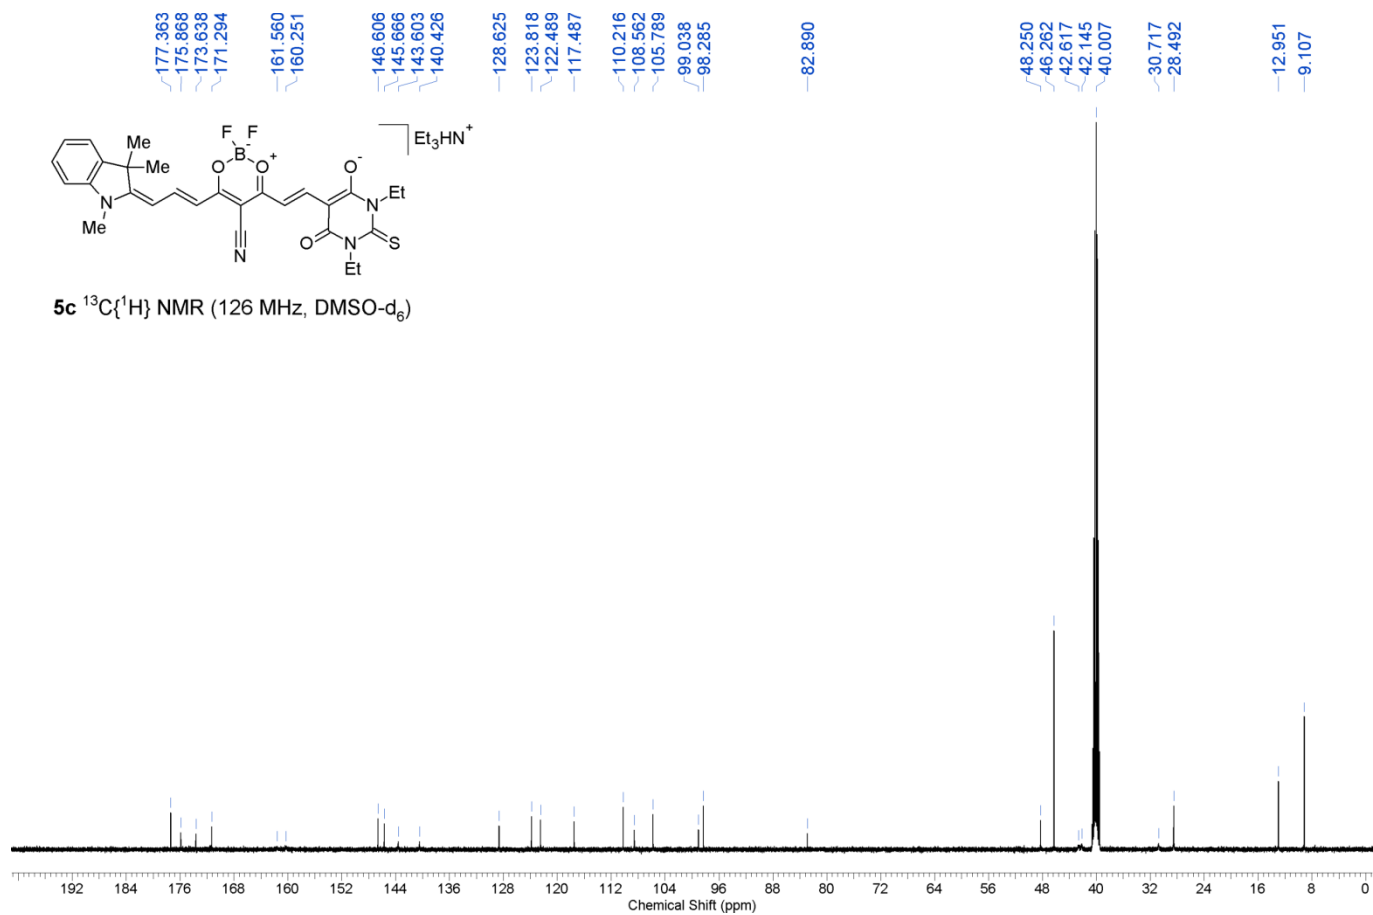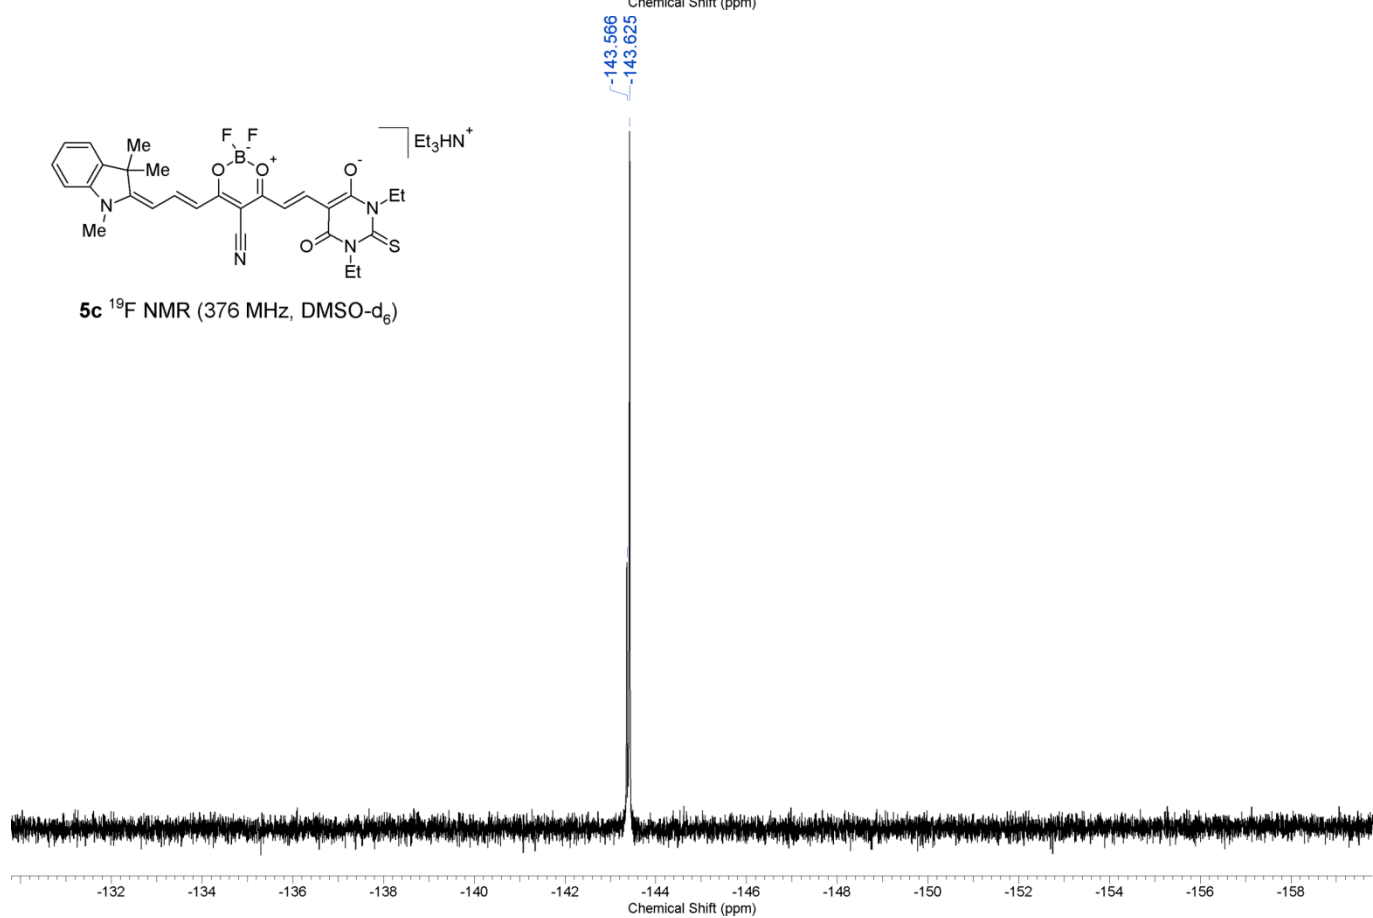

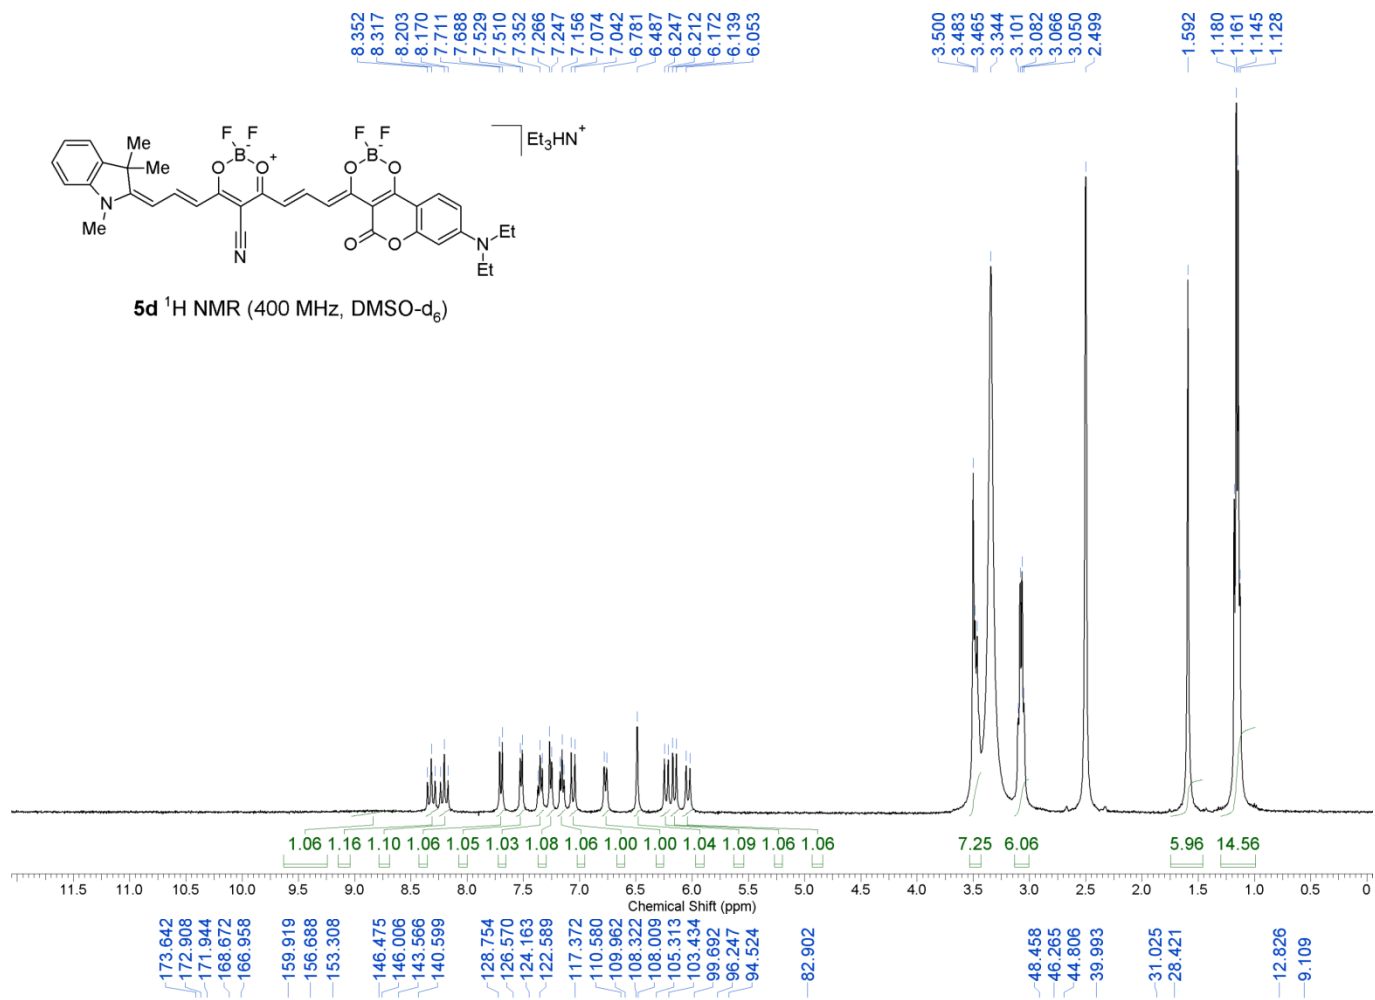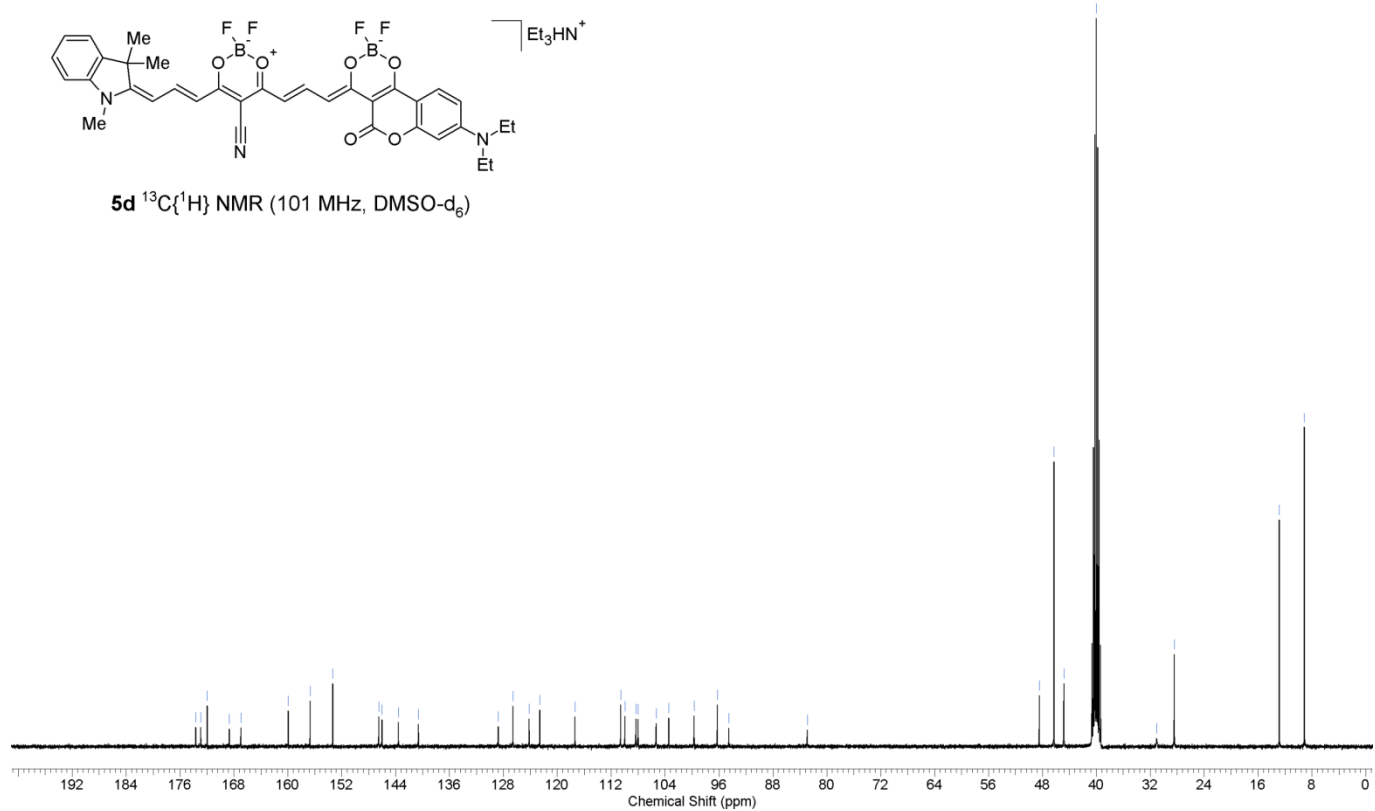

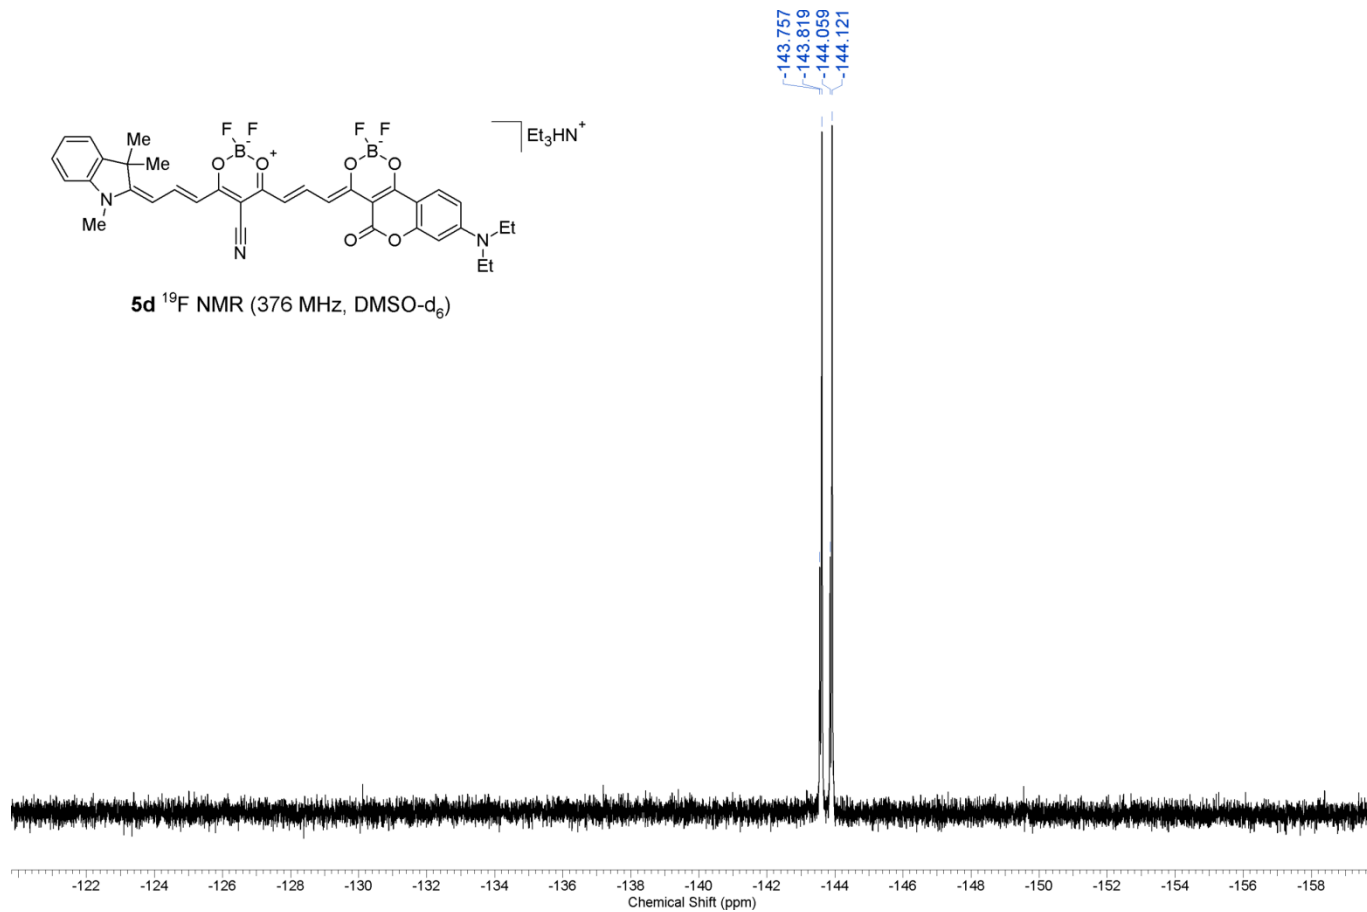

### Mero-Anionic Dyes 6a-d

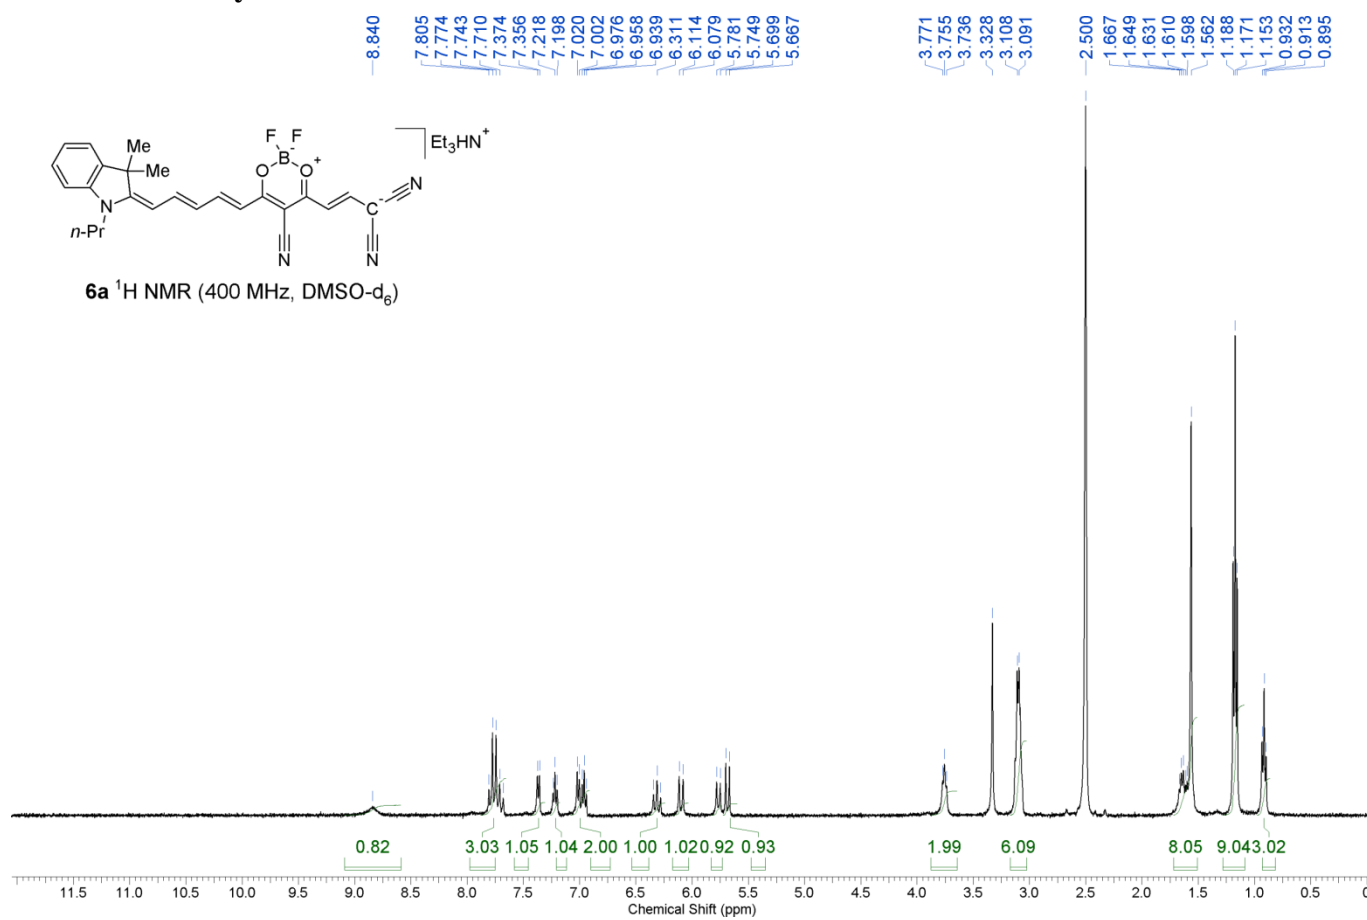

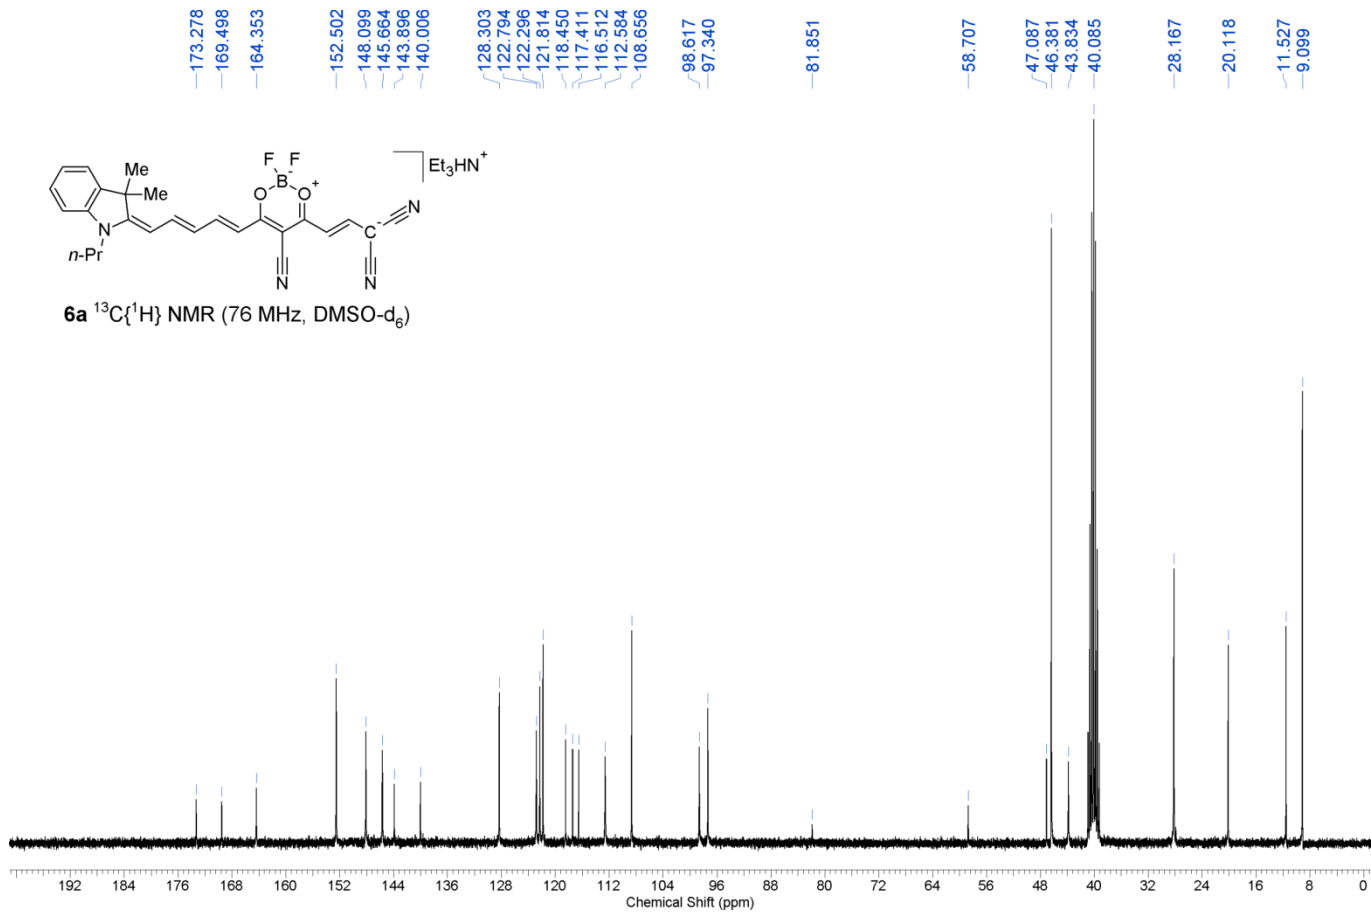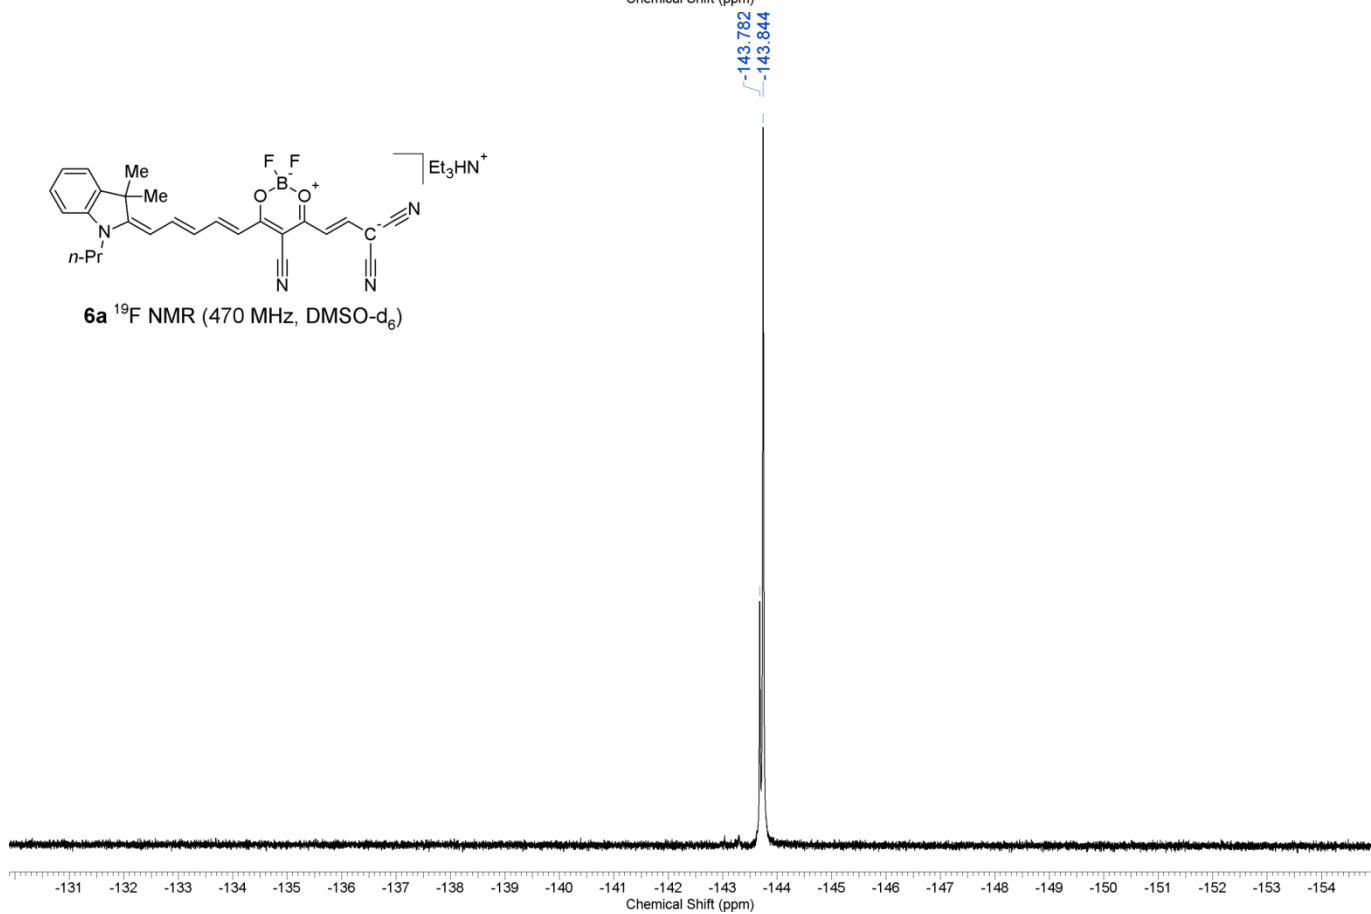

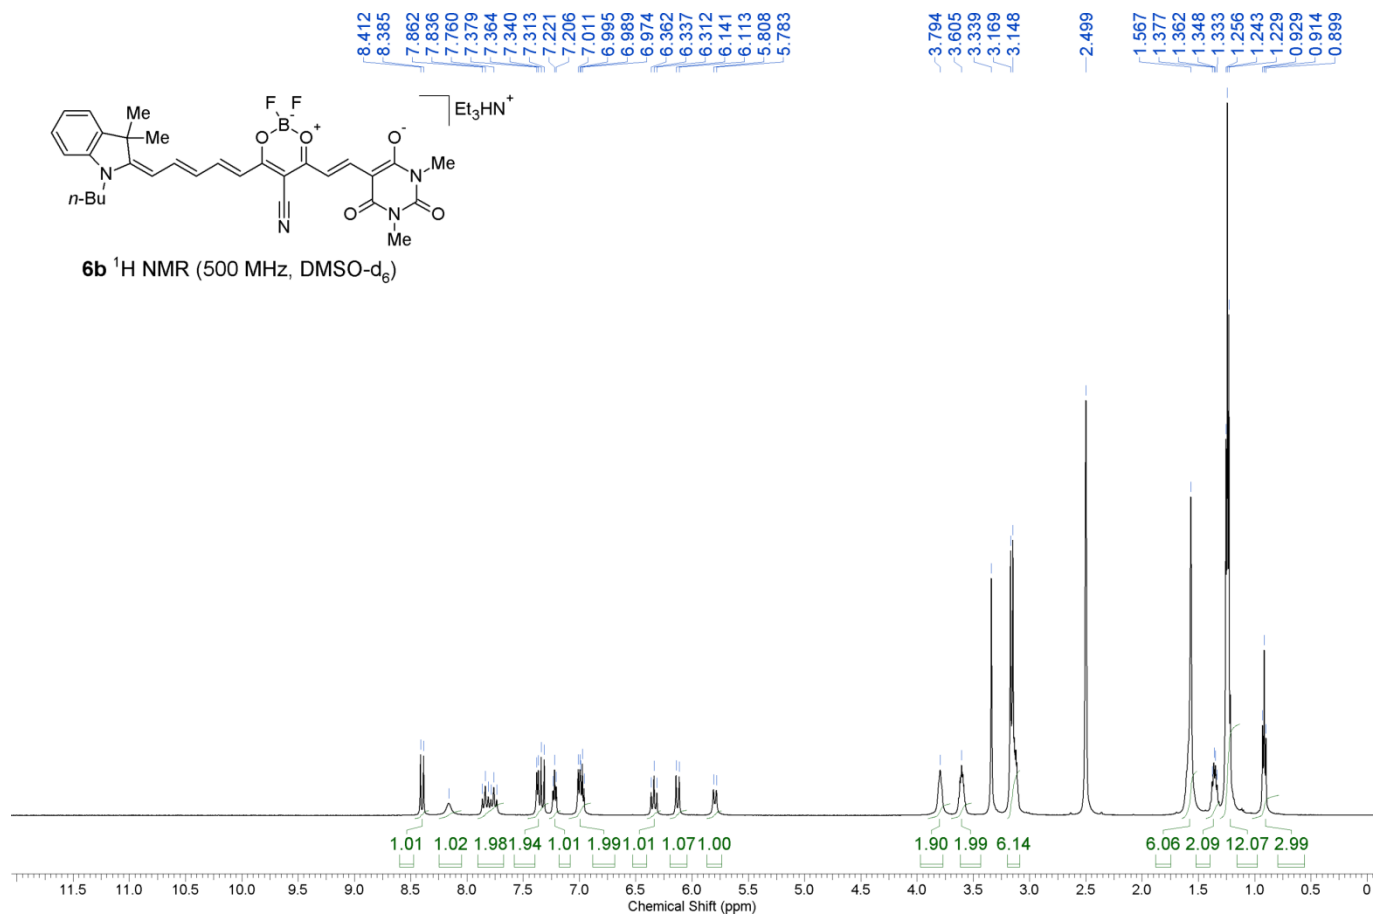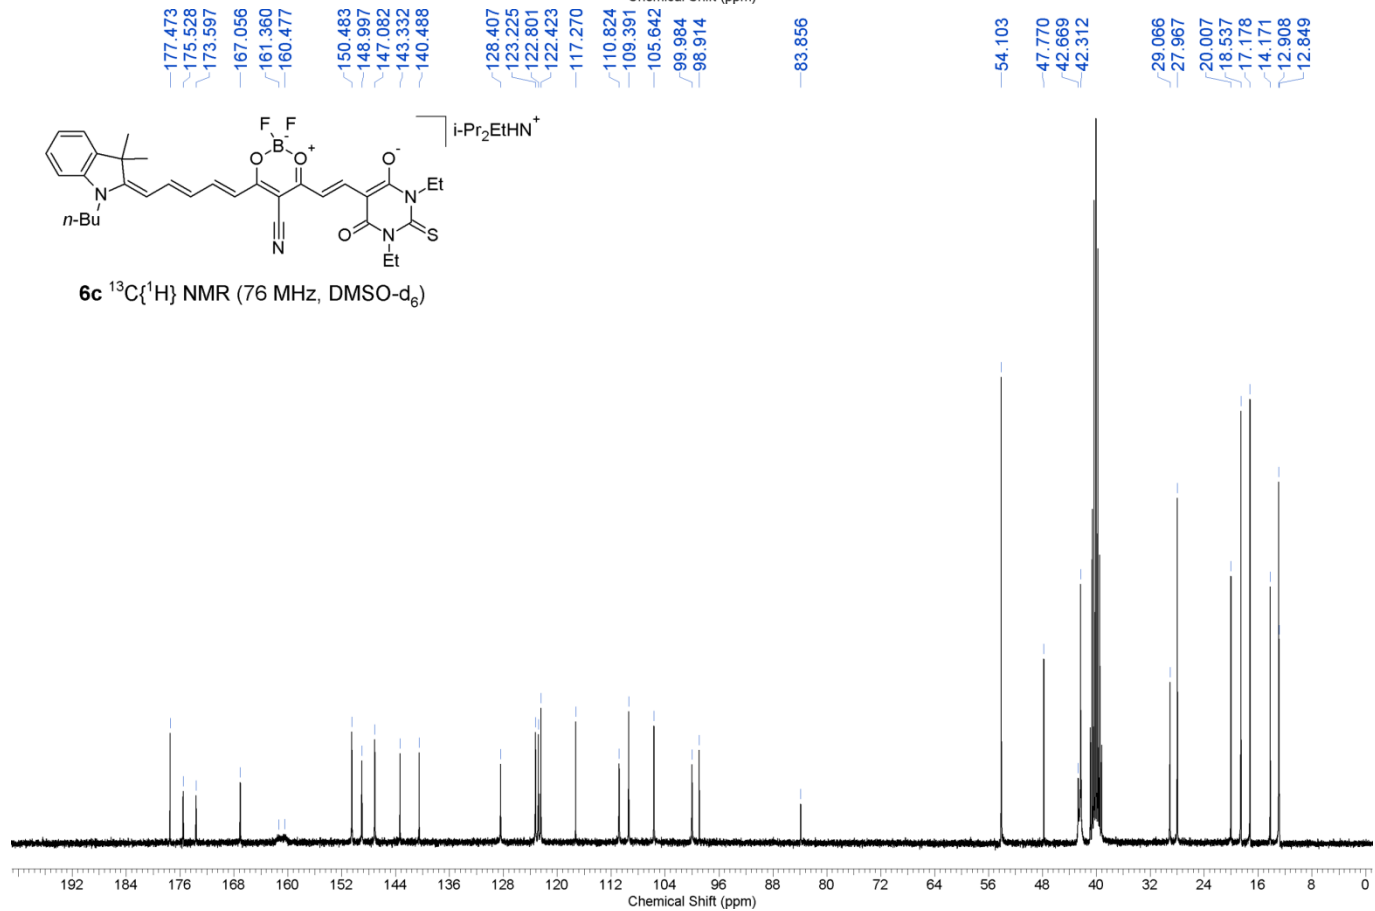



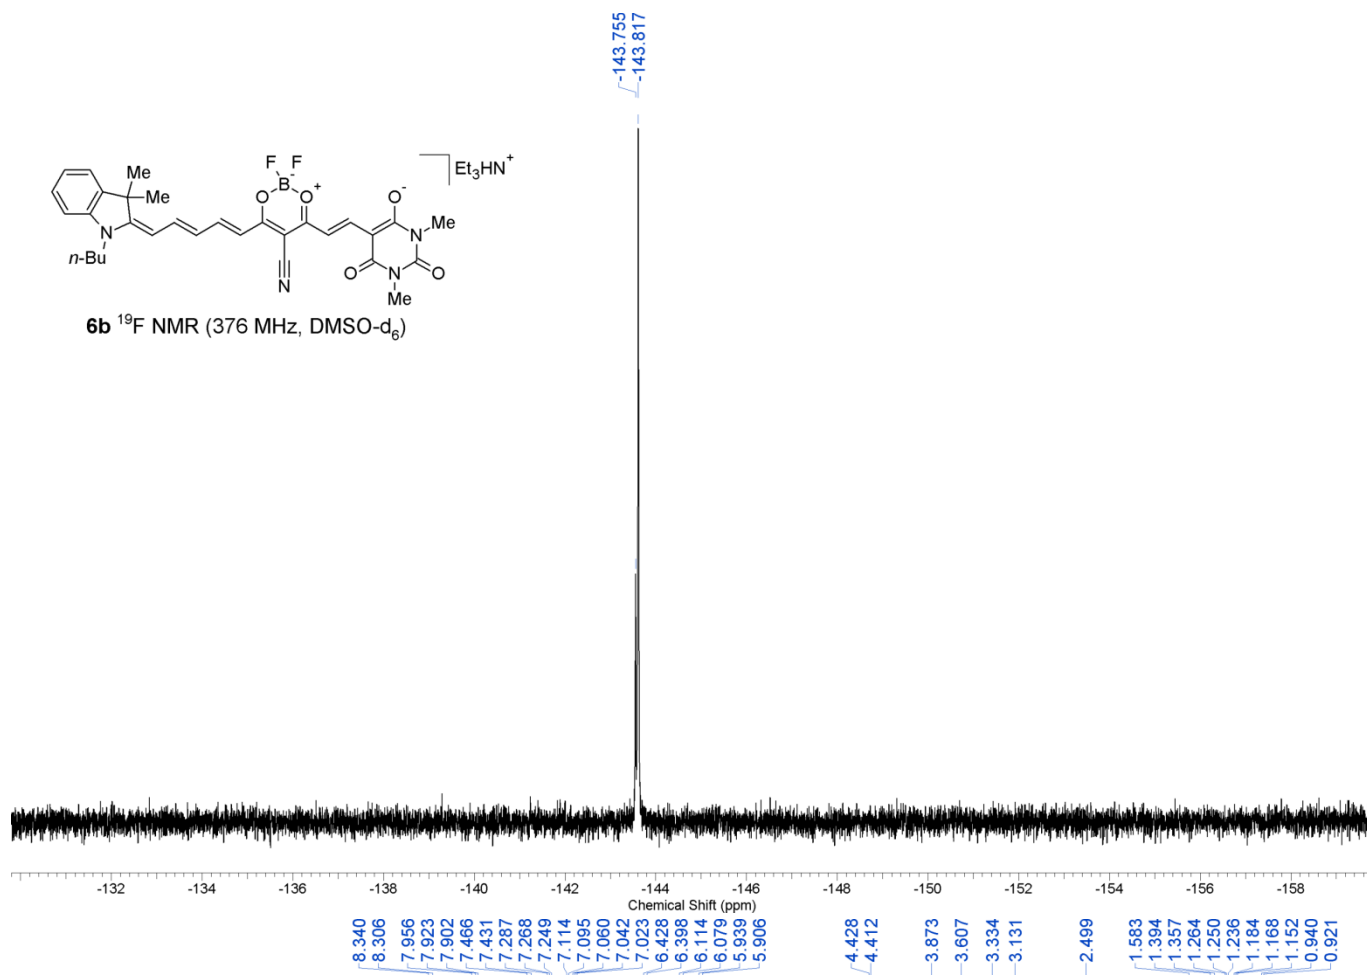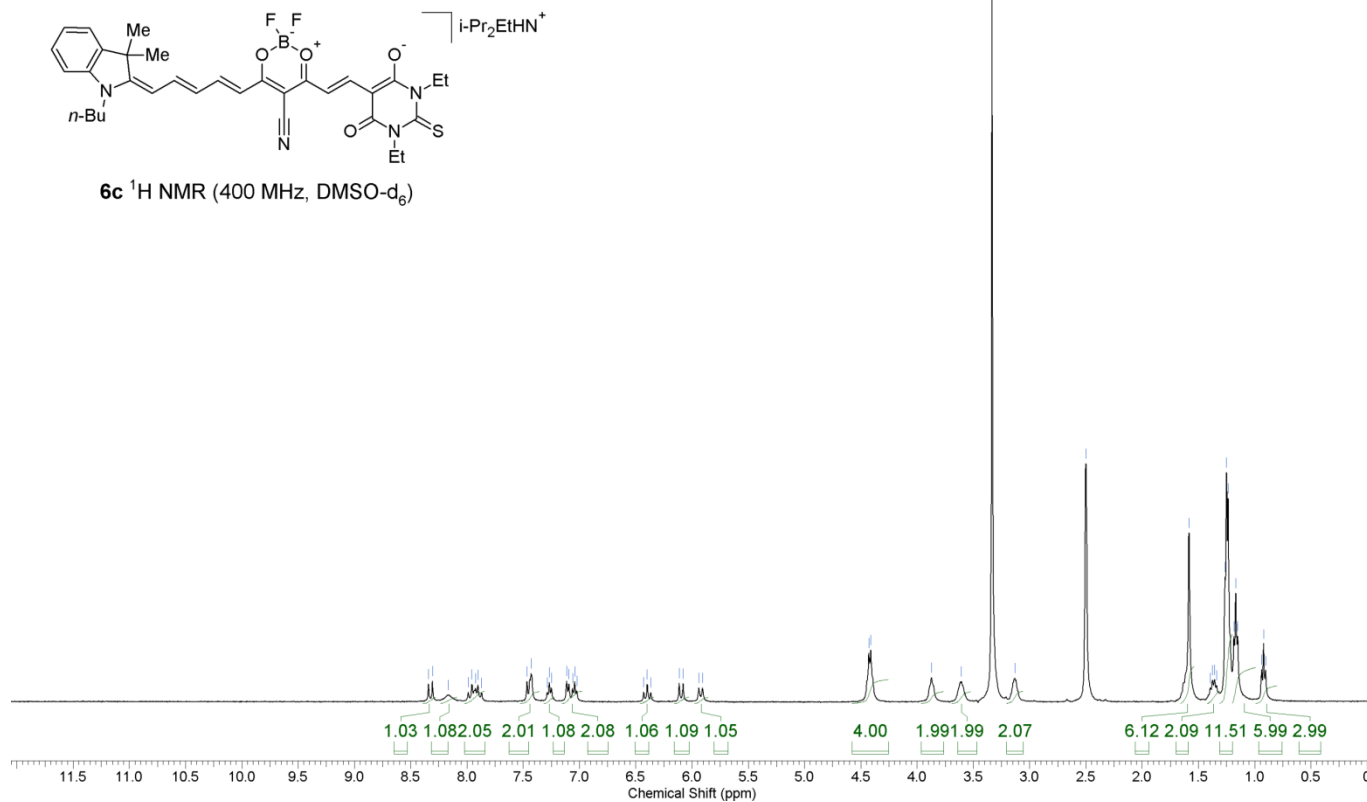

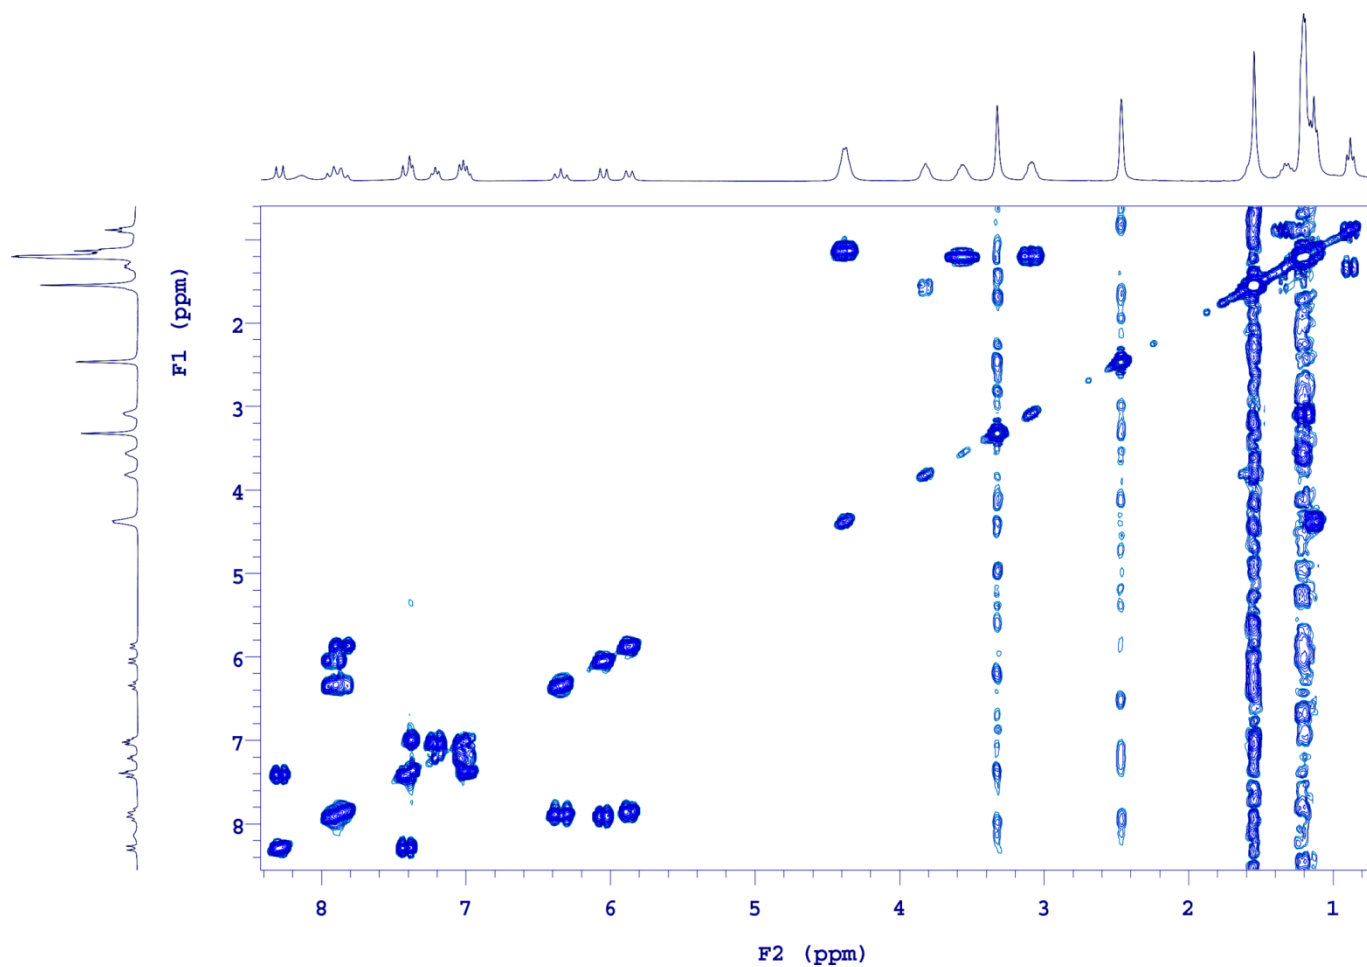

**Figure S9.** COSY NMR spectrum of **6c** (DMSO- $d_6$ , 300 MHz)

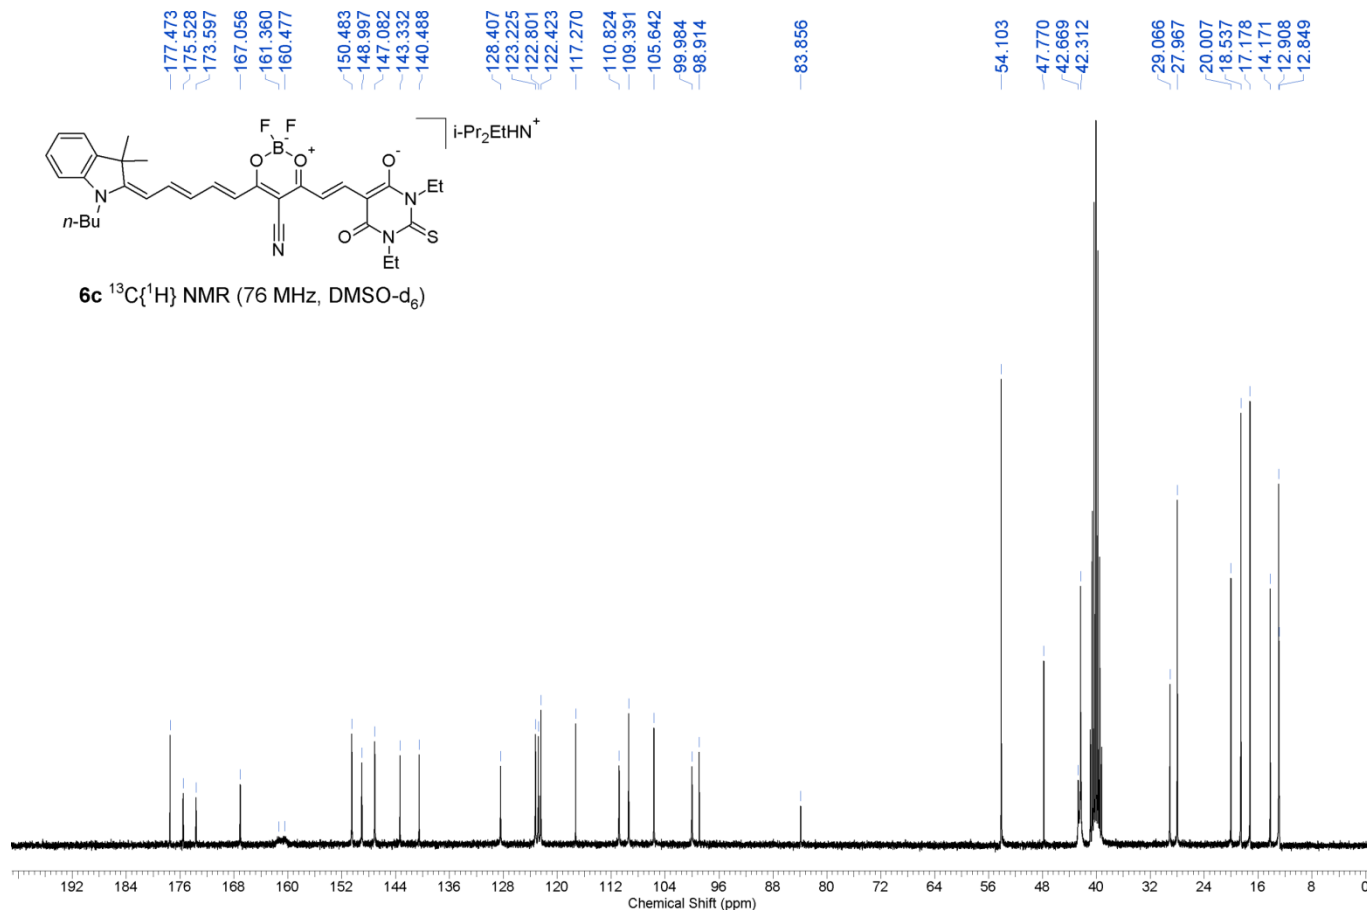

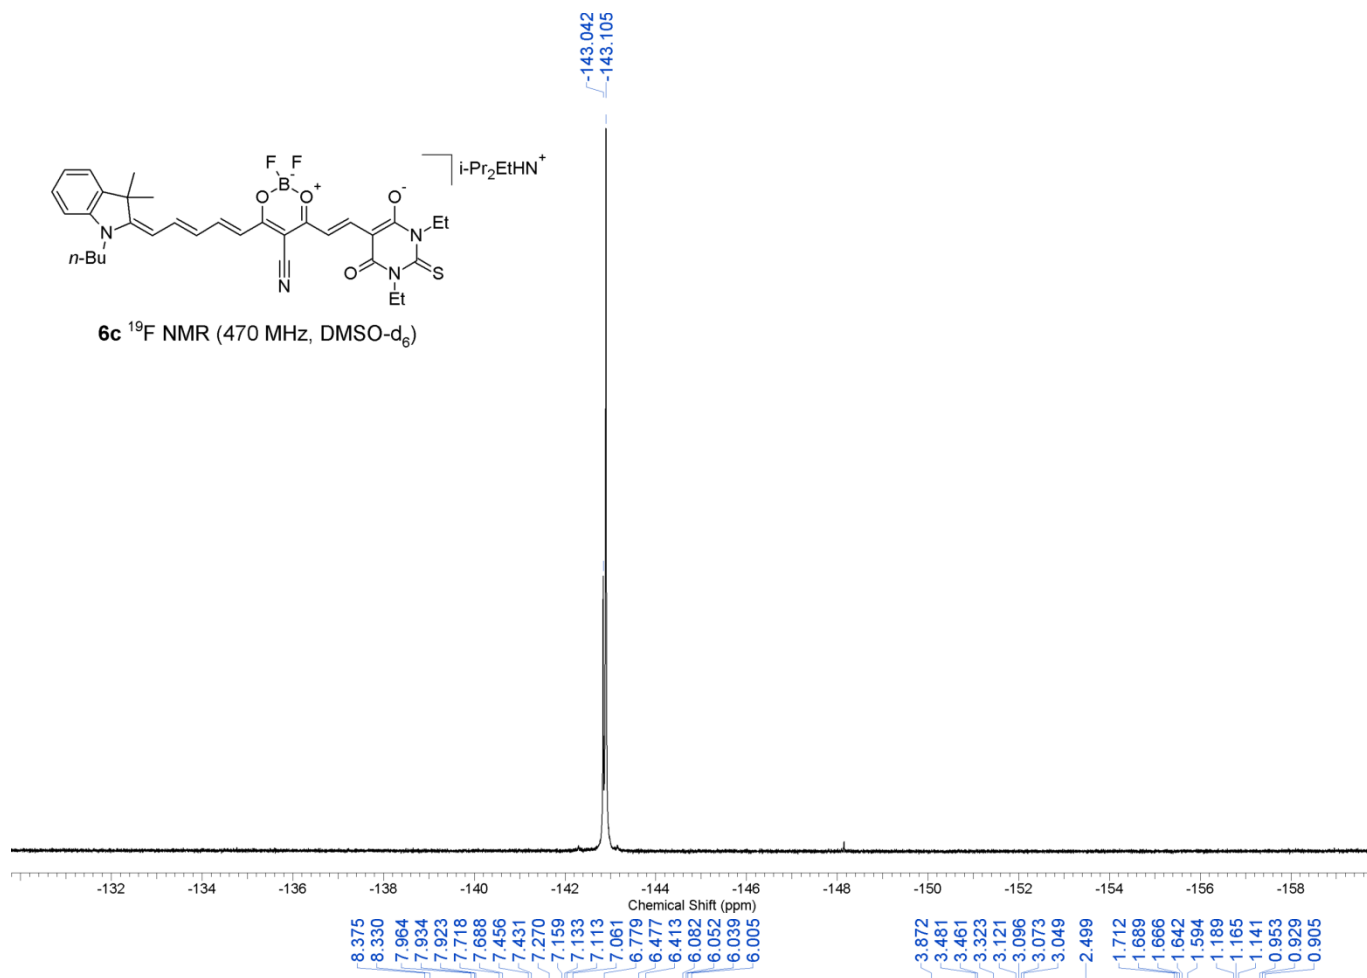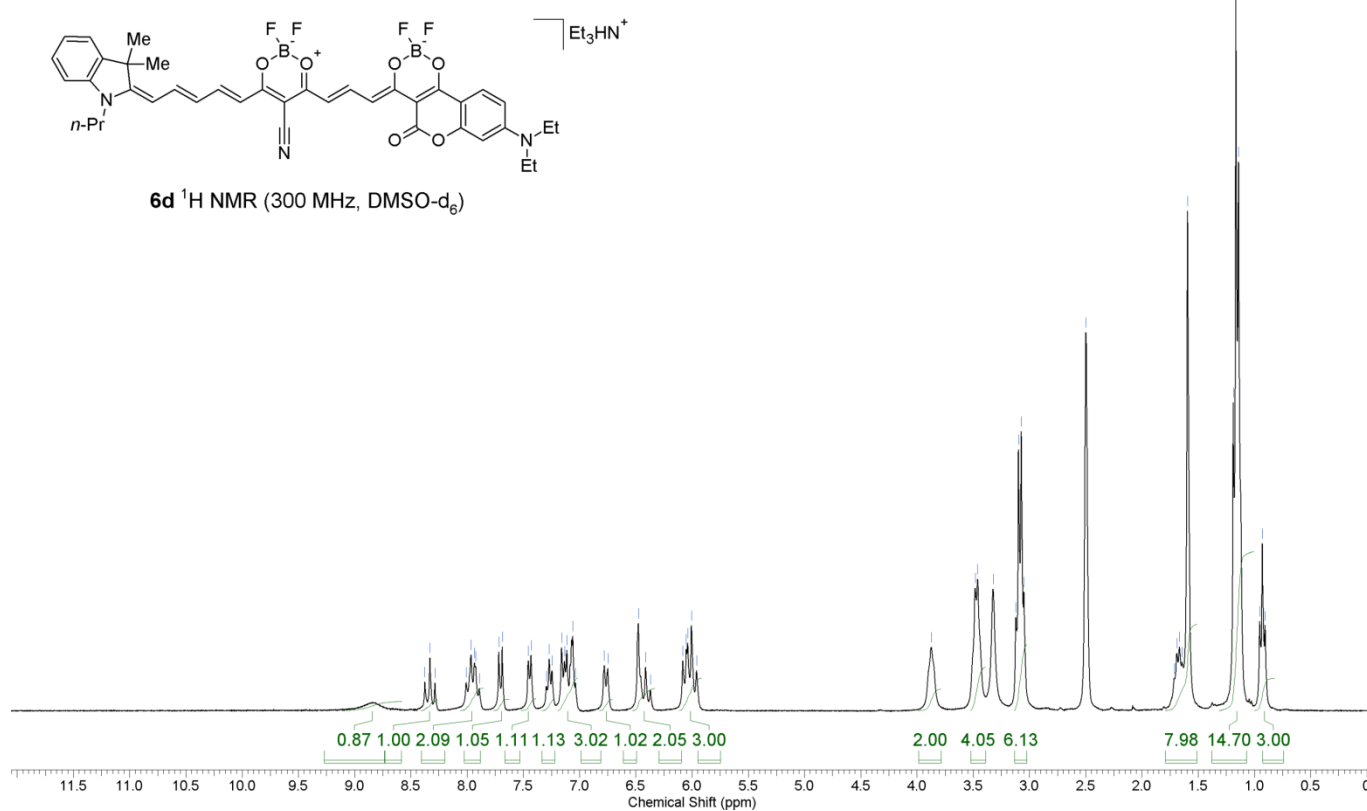

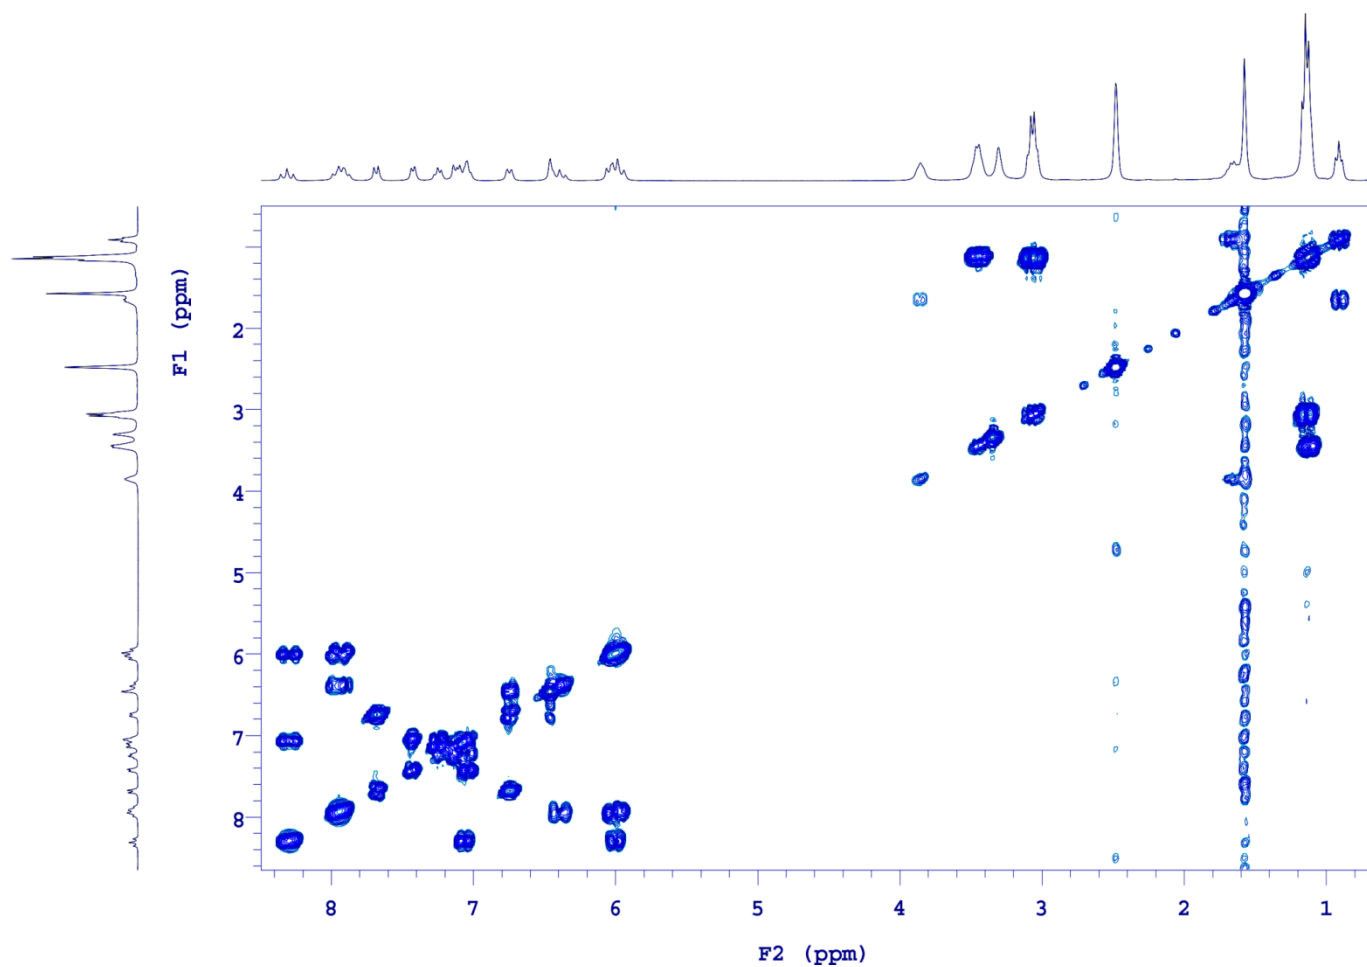

**Figure S10.** COSY NMR spectrum of **6d** (DMSO- $d_6$ , 300 MHz)

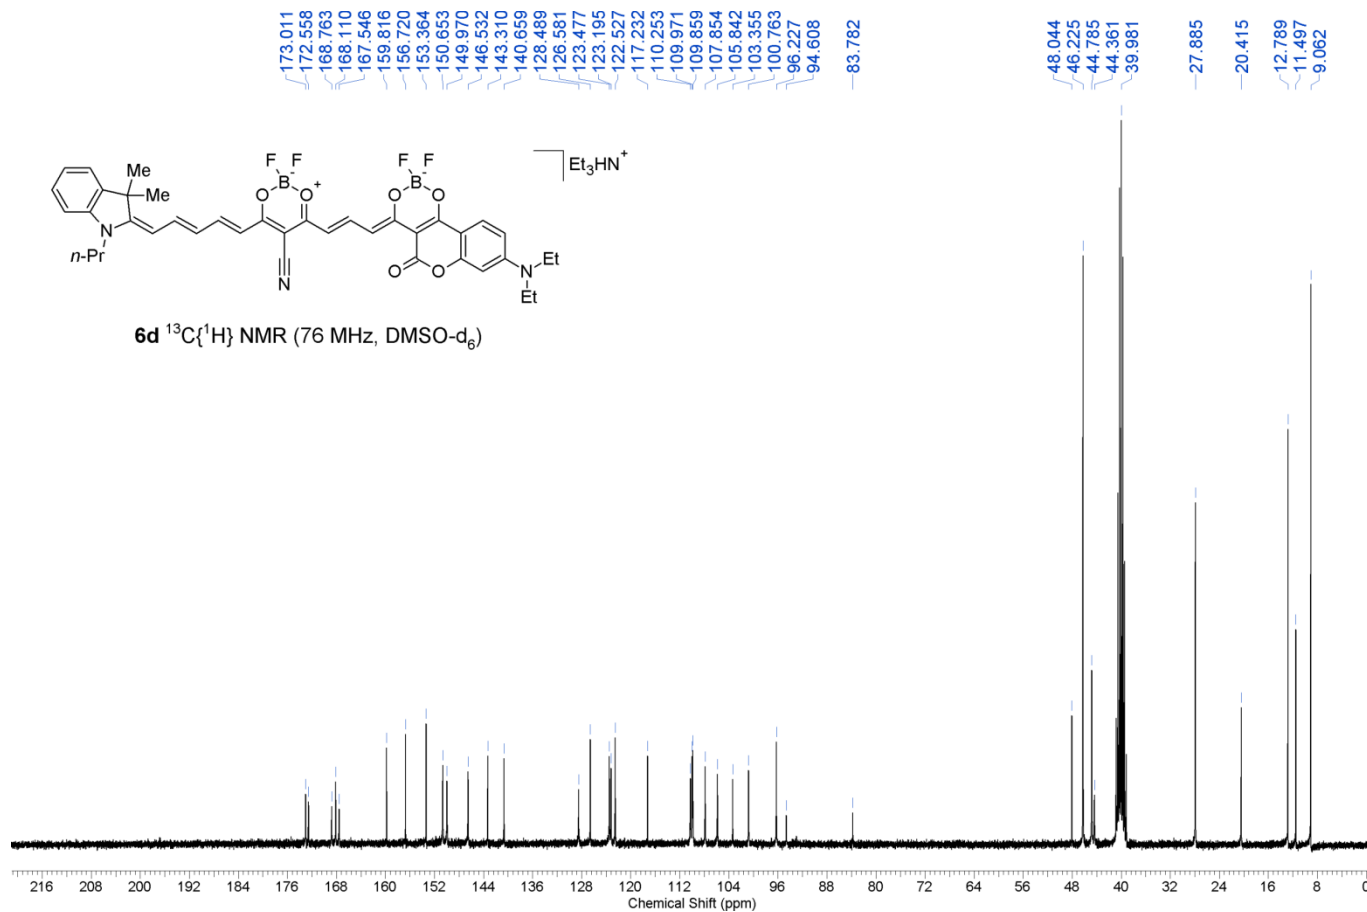

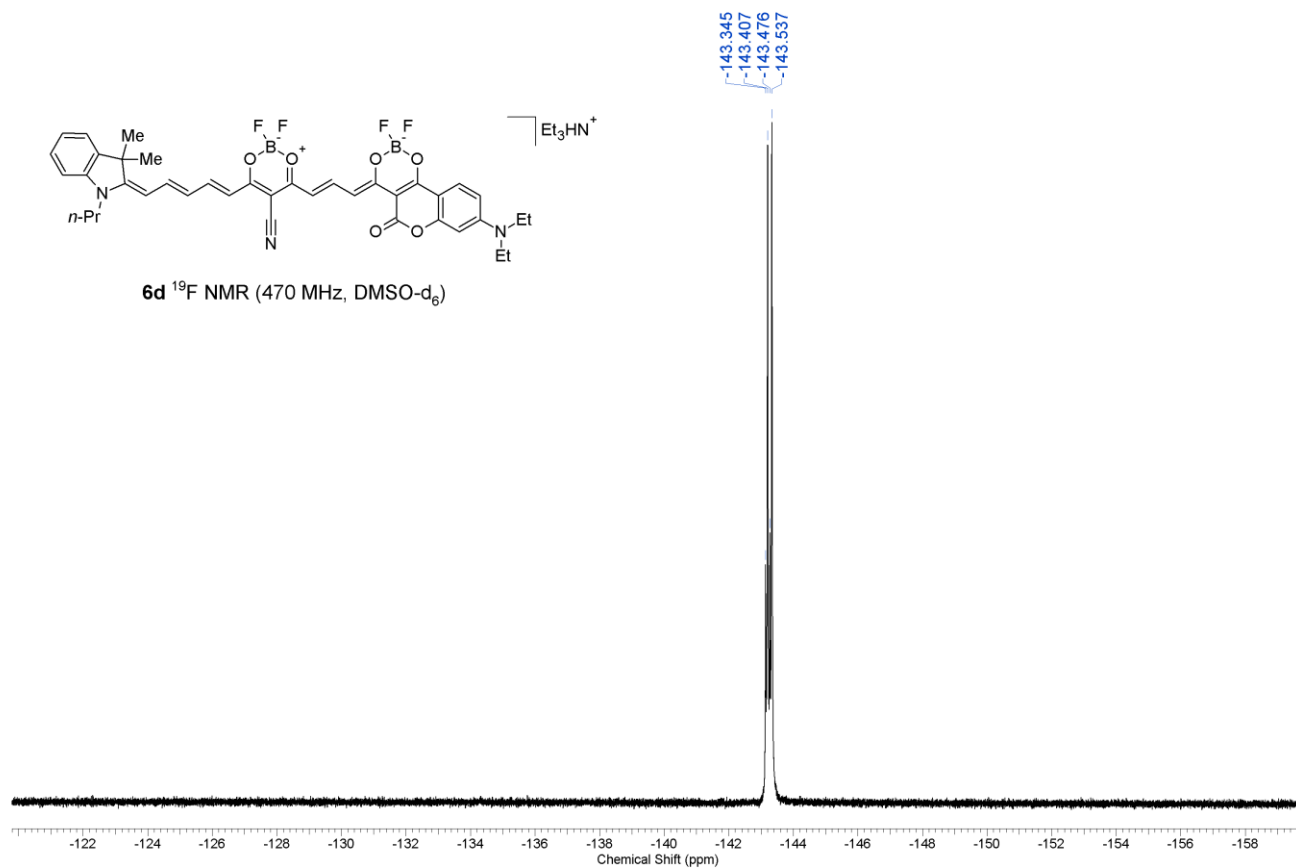

### Mero-Anionic Dyes 14a-c

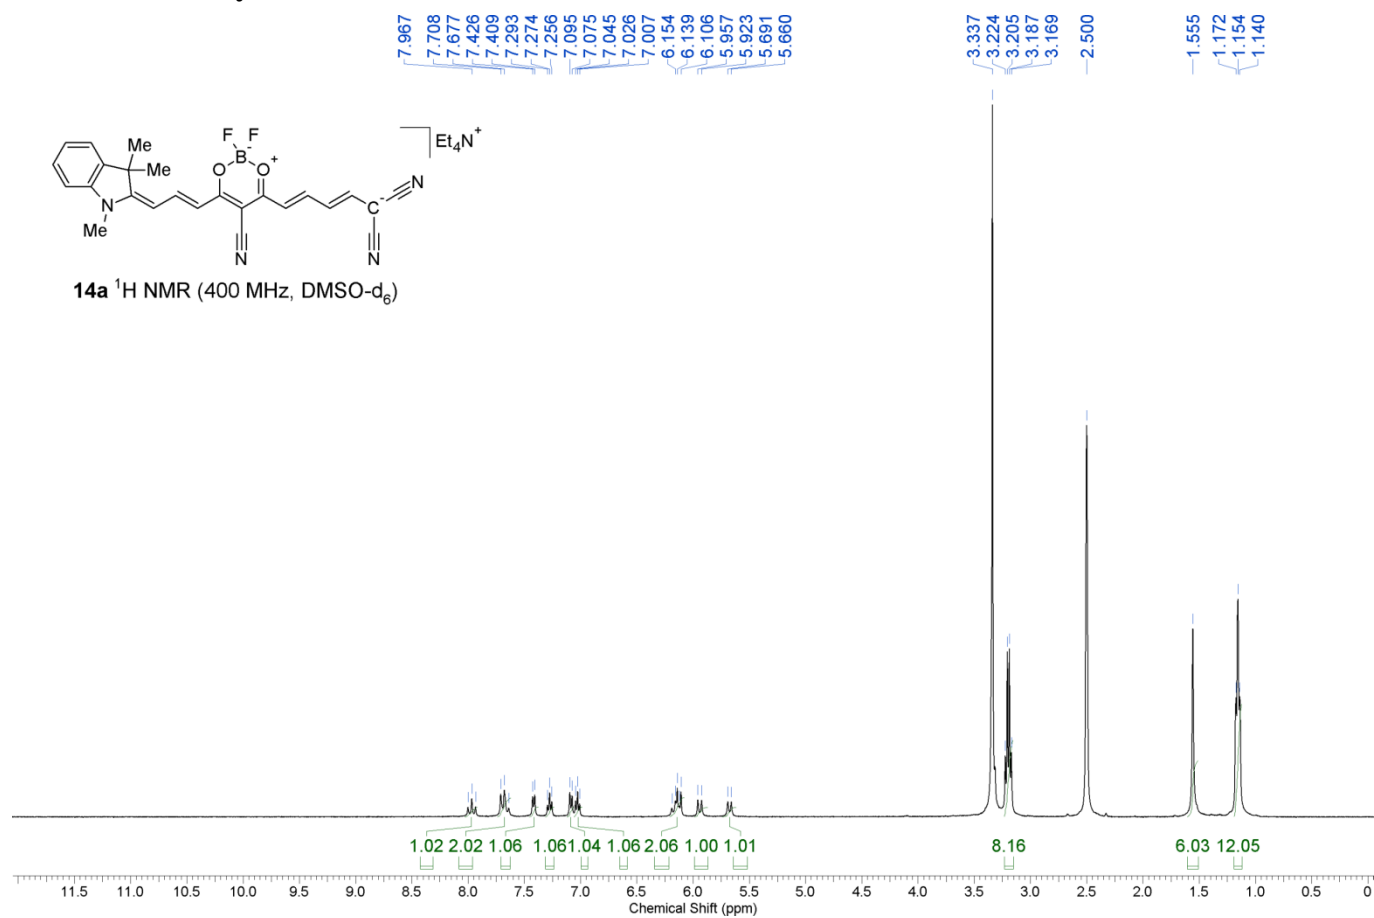

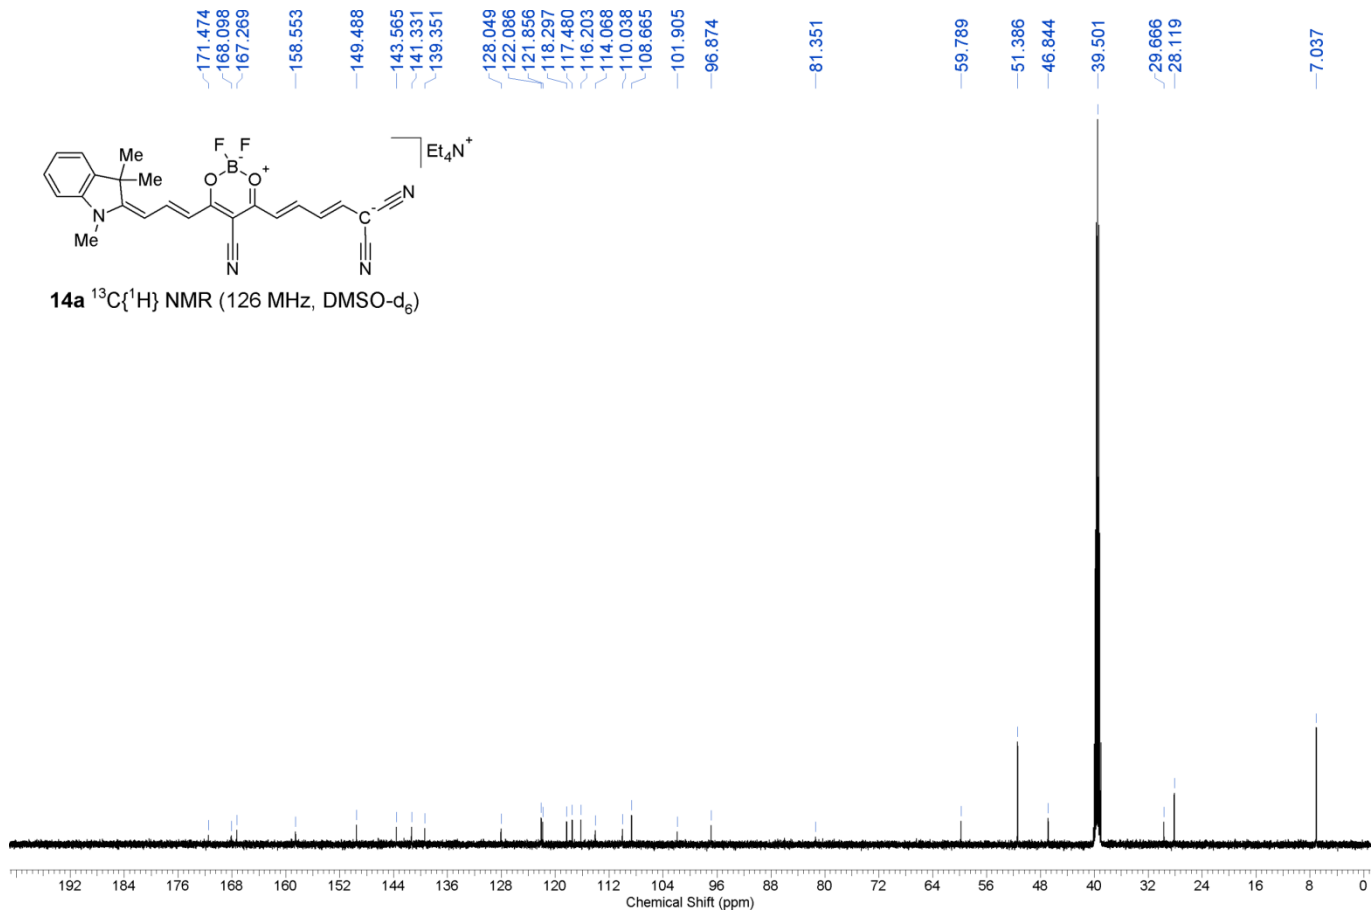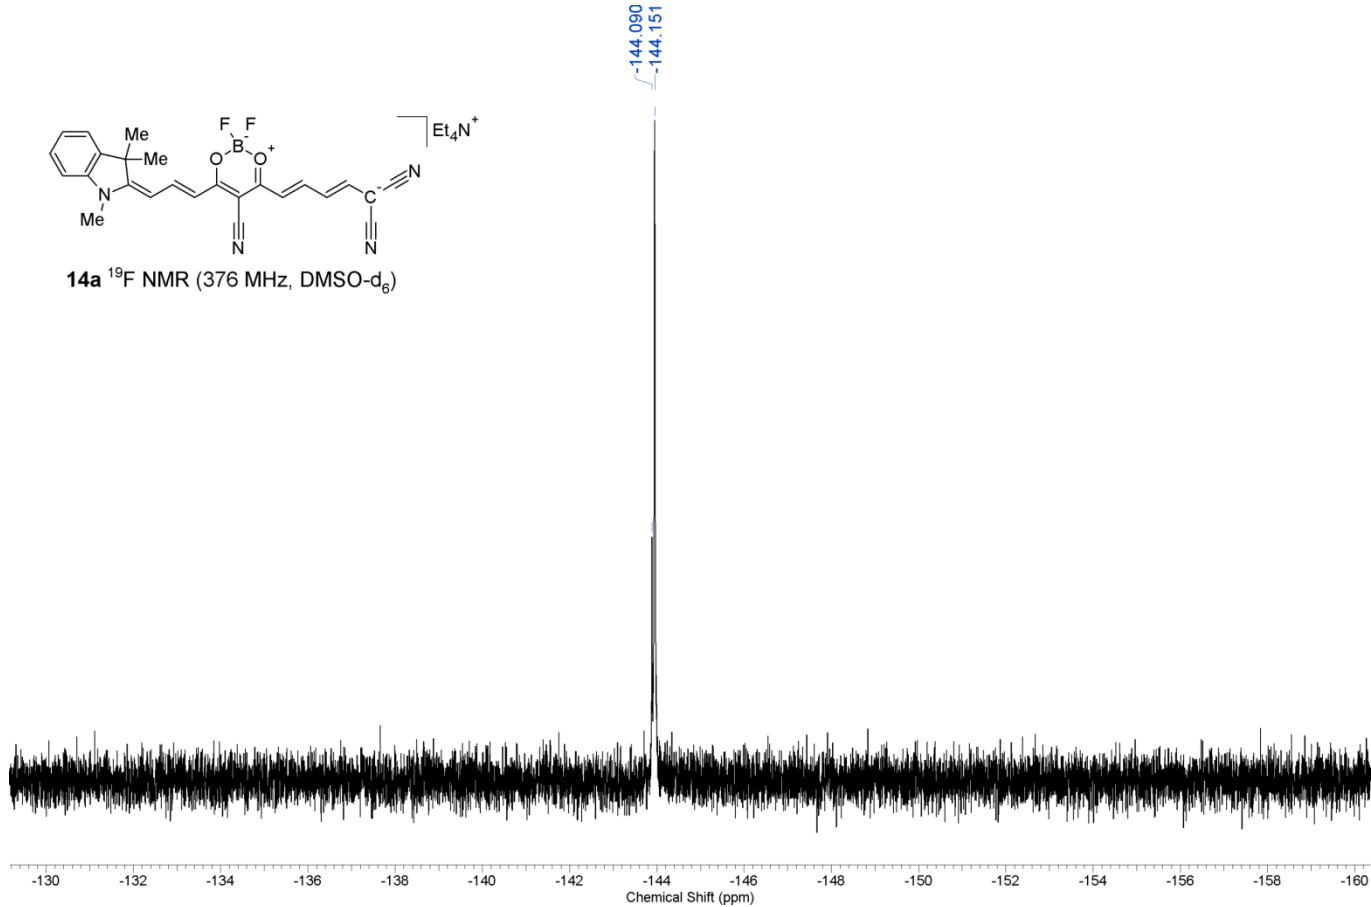

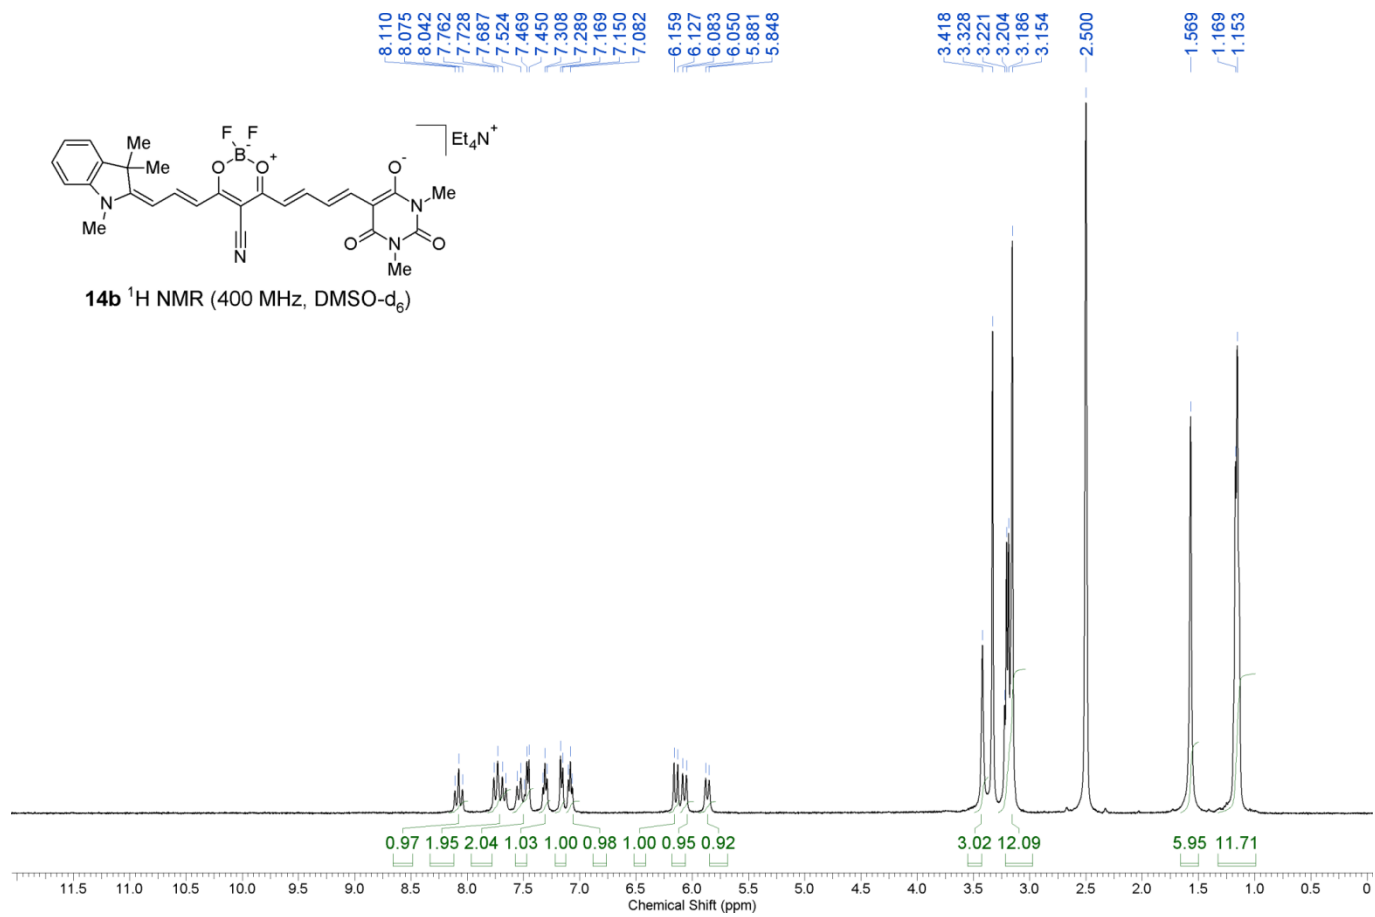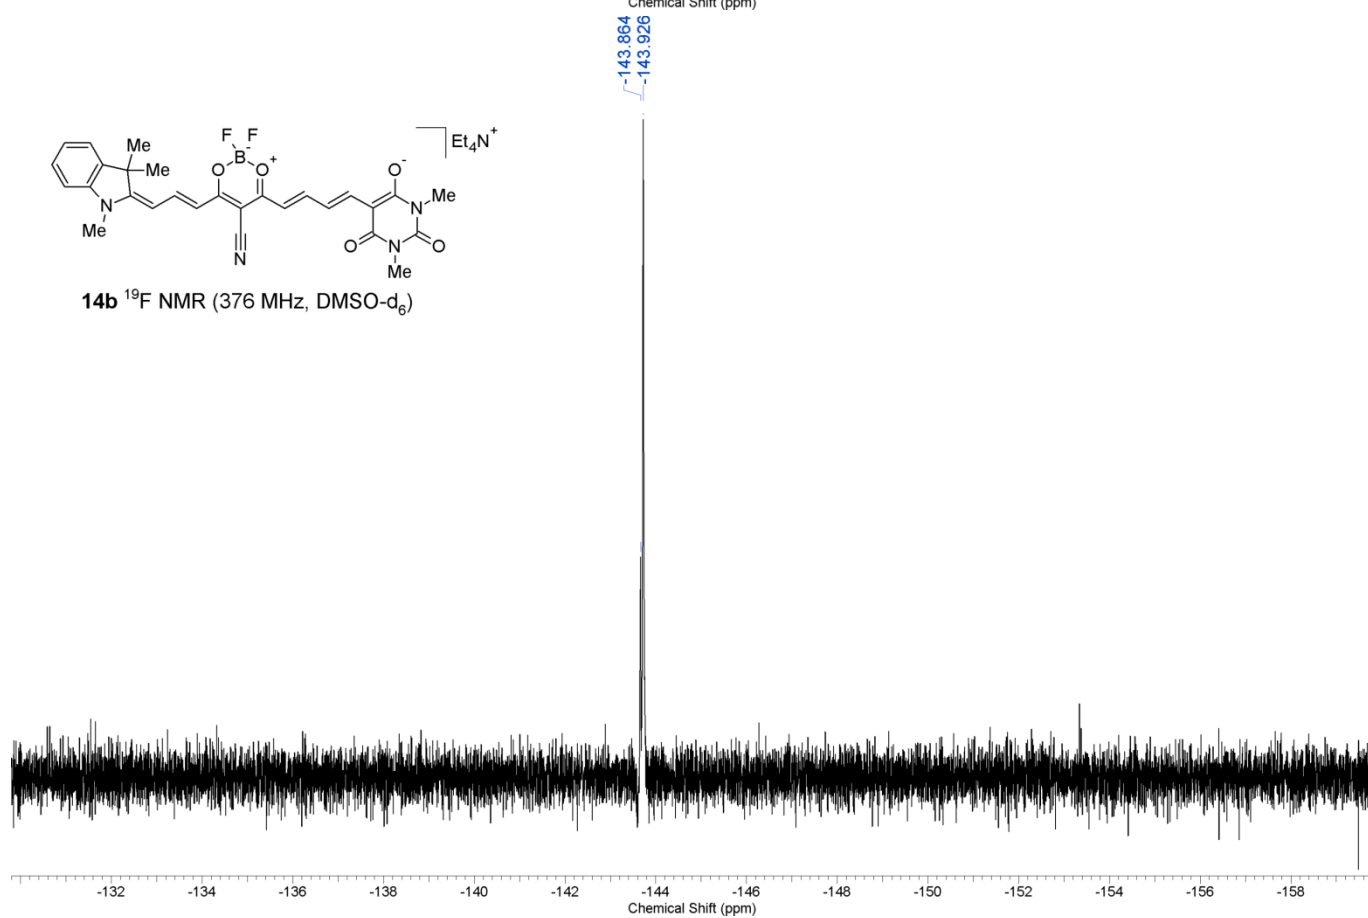



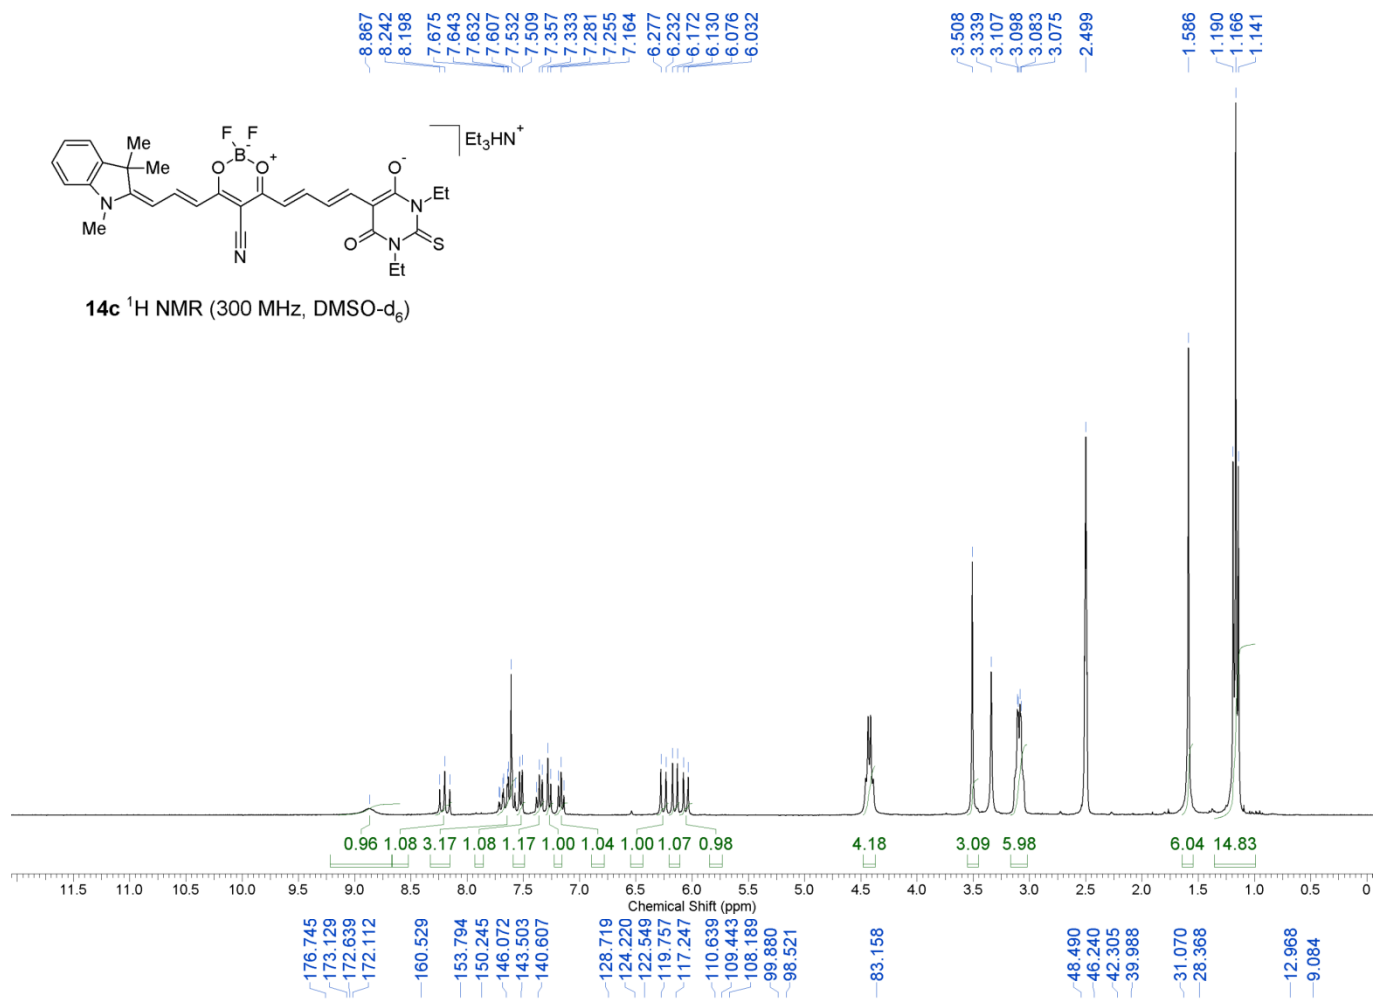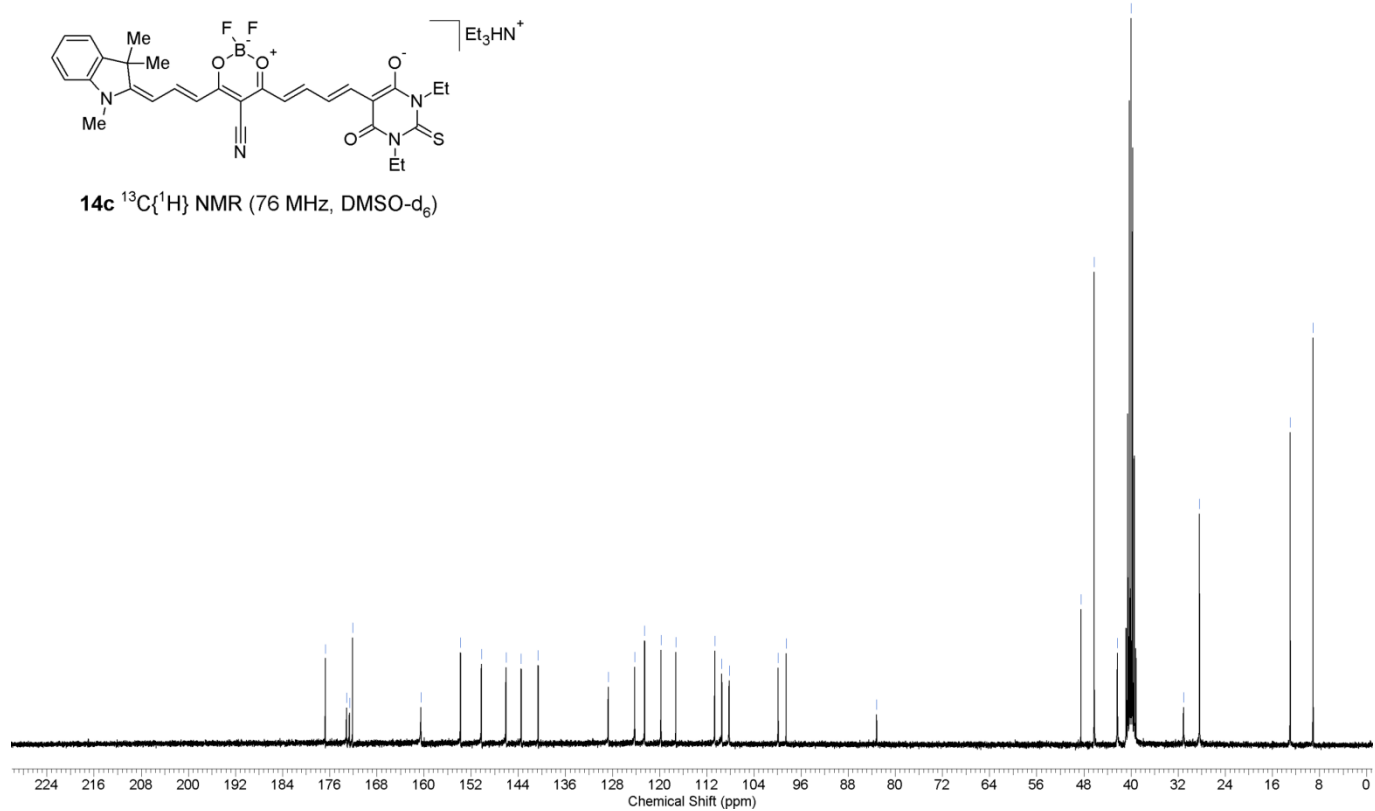

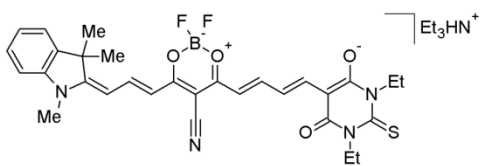

**14c**  $^{19}\text{F}$  NMR (376 MHz,  $\text{DMSO-d}_6$ )

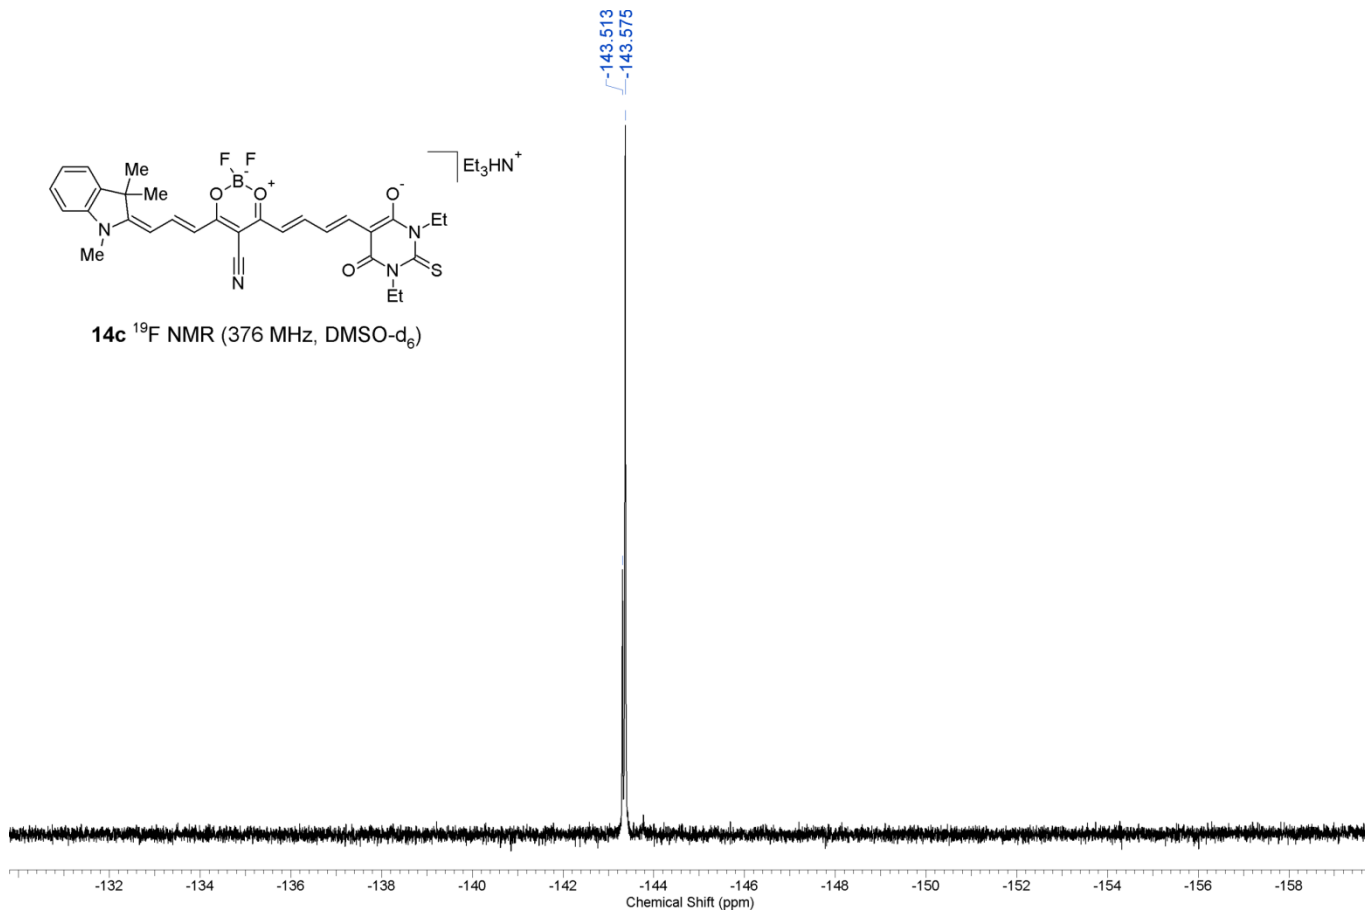

## References

- 1 G. M. Sheldrick, *Acta Crystallogr. Sect. C Struct. Chem.*, 2015, **71**, 3–8.
- 2 A. E. Reed, R. B. Weinstock and F. Weinhold, *J. Chem. Phys.*, 1985, **83**, 735–746.
